# Supplementary material
Source: publisher figshare collection journal article supplement (https://acs.figshare.com/ndownloader/files/4089802)
Supplement: Supplementary file 1 [file 4089802]

data_ki367_compound_12

_audit_creation_method            SHELXL-97
_chemical_name_systematic
;
 ?
;
_chemical_name_common             ?
_chemical_melting_point           ?
_chemical_formula_moiety          'C13 H28 B P Si2'
_chemical_formula_sum             'C13 H28 B P Si2'
_chemical_formula_weight          282.31

loop_
 _atom_type_symbol
 _atom_type_description
 _atom_type_scat_dispersion_real
 _atom_type_scat_dispersion_imag
 _atom_type_scat_source
 'C'  'C'   0.0033   0.0016
 'International Tables Vol C Tables 4.2.6.8 and 6.1.1.4'
 'H'  'H'   0.0000   0.0000
 'International Tables Vol C Tables 4.2.6.8 and 6.1.1.4'
 'B'  'B'   0.0013   0.0007
 'International Tables Vol C Tables 4.2.6.8 and 6.1.1.4'
 'Si'  'Si'   0.0817   0.0704
 'International Tables Vol C Tables 4.2.6.8 and 6.1.1.4'
 'P'  'P'   0.1023   0.0942
 'International Tables Vol C Tables 4.2.6.8 and 6.1.1.4'

_symmetry_cell_setting            triclinic
_symmetry_space_group_name_H-M    'P -1'

loop_
 _symmetry_equiv_pos_as_xyz
 'x, y, z'
 '-x, -y, -z'

_cell_length_a                    6.608(4)
_cell_length_b                    8.627(7)
_cell_length_c                    16.504(16)
_cell_angle_alpha                 97.67(8)
_cell_angle_beta                  93.65(7)
_cell_angle_gamma                 106.33(7)
_cell_volume                      889.7(12)
_cell_formula_units_Z             2
_cell_measurement_temperature     150(2)
_cell_measurement_reflns_used     125
_cell_measurement_theta_min       2.50
_cell_measurement_theta_max       27.5

_exptl_crystal_description        block
_exptl_crystal_colour             colourless
_exptl_crystal_size_max           0.45
_exptl_crystal_size_mid           0.20
_exptl_crystal_size_min           0.20
_exptl_crystal_density_meas       ?
_exptl_crystal_density_diffrn     1.054
_exptl_crystal_density_method     'not measured'
_exptl_crystal_F_000              308
_exptl_absorpt_coefficient_mu     0.271
_exptl_absorpt_correction_type    multi-scan
_exptl_absorpt_correction_T_min   0.888
_exptl_absorpt_correction_T_max   0.948
_exptl_absorpt_process_details    SADABS

_exptl_special_details
;
 ?
;

_diffrn_ambient_temperature       150(2)
_diffrn_radiation_wavelength      0.71073
_diffrn_radiation_type            MoK\a
_diffrn_radiation_source          'sealed tube'
_diffrn_radiation_monochromator   graphite
_diffrn_measurement_device_type   'Nonius KappaCCD diffractometer'
_diffrn_measurement_method        '\f and \w scans'
_diffrn_detector_area_resol_mean  ?
_diffrn_reflns_number             14598
_diffrn_reflns_av_R_equivalents   0.0984
_diffrn_reflns_av_sigmaI/netI     0.0943
_diffrn_reflns_limit_h_min        -8
_diffrn_reflns_limit_h_max        8
_diffrn_reflns_limit_k_min        -11
_diffrn_reflns_limit_k_max        11
_diffrn_reflns_limit_l_min        -21
_diffrn_reflns_limit_l_max        21
_diffrn_reflns_theta_min          4.17
_diffrn_reflns_theta_max          27.50
_reflns_number_total              4039
_reflns_number_gt                 2496
_reflns_threshold_expression      I>2\s(I)

_computing_data_collection        'Nonius COLLECT'
_computing_cell_refinement        EvalCCD
_computing_data_reduction         EvalCCD
_computing_structure_solution     'Bruker SHELXTL'
_computing_structure_refinement   'Bruker SHELXTL'
_computing_molecular_graphics     'Bruker SHELXTL'
_computing_publication_material   'Bruker SHELXTL and local programs'

_refine_special_details
;
 Refinement of F^2^ against ALL reflections.  The weighted R-factor wR and
 goodness of fit S are based on F^2^, conventional R-factors R are based
 on F, with F set to zero for negative F^2^. The threshold expression of
 F^2^ > 2sigma(F^2^) is used only for calculating R-factors(gt) etc. and is
 not relevant to the choice of reflections for refinement.  R-factors based
 on F^2^ are statistically about twice as large as those based on F, and R-
 factors based on ALL data will be even larger.

One SiMe3 group is disordered; each methyl group was refined as two components.
No restraints or additional constraints were required.
;

_refine_ls_structure_factor_coef  Fsqd
_refine_ls_matrix_type            full
_refine_ls_weighting_scheme       calc
_refine_ls_weighting_details
 'calc w=1/[\s^2^(Fo^2^)+(0.1062P)^2^+0.6941P] where P=(Fo^2^+2Fc^2^)/3'
_atom_sites_solution_primary      direct
_atom_sites_solution_secondary    difmap
_atom_sites_solution_hydrogens    mixed
_refine_ls_hydrogen_treatment     mixed
_refine_ls_extinction_method      none
_refine_ls_extinction_coef        ?
_refine_ls_number_reflns          4039
_refine_ls_number_parameters      198
_refine_ls_number_restraints      0
_refine_ls_R_factor_all           0.1315
_refine_ls_R_factor_gt            0.0770
_refine_ls_wR_factor_ref          0.2229
_refine_ls_wR_factor_gt           0.1854
_refine_ls_goodness_of_fit_ref    1.041
_refine_ls_restrained_S_all       1.041
_refine_ls_shift/su_max           0.000
_refine_ls_shift/su_mean          0.000

loop_
 _atom_site_label
 _atom_site_type_symbol
 _atom_site_fract_x
 _atom_site_fract_y
 _atom_site_fract_z
 _atom_site_U_iso_or_equiv
 _atom_site_adp_type
 _atom_site_occupancy
 _atom_site_symmetry_multiplicity
 _atom_site_calc_flag
 _atom_site_refinement_flags
 _atom_site_disorder_assembly
 _atom_site_disorder_group
P P 0.71894(18) 0.60433(12) 0.18721(6) 0.0489(3) Uani 1 1 d . . .
H1P H 0.532(5) 0.486(4) 0.179(2) 0.044(10) Uiso 1 1 d . . .
B B 0.9748(17) 0.5419(13) 0.1993(5) 0.102(3) Uani 1 1 d . . .
H1A H 1.112(10) 0.664(8) 0.211(4) 0.13(3) Uiso 1 1 d . . .
H1B H 0.976(9) 0.470(7) 0.144(4) 0.11(2) Uiso 1 1 d . . .
H1C H 0.927(8) 0.465(7) 0.242(3) 0.101(18) Uiso 1 1 d . . .
Si1 Si 0.84868(17) 0.96154(12) 0.28360(7) 0.0516(4) Uani 1 1 d . . .
Si2 Si 0.62598(15) 0.64466(13) 0.36790(6) 0.0422(3) Uani 1 1 d . . .
C1 C 0.6693(5) 0.7432(4) 0.27098(19) 0.0338(7) Uani 1 1 d . A .
H1 H 0.5263 0.7525 0.2530 0.041 Uiso 1 1 calc R . .
C2 C 0.846(2) 1.0871(12) 0.3770(6) 0.085(3) Uani 0.564(7) 1 d P A 1
H2A H 0.7234 1.1292 0.3733 0.127 Uiso 0.564(7) 1 calc PR A 1
H2B H 0.9768 1.1788 0.3874 0.127 Uiso 0.564(7) 1 calc PR A 1
H2C H 0.8372 1.0229 0.4220 0.127 Uiso 0.564(7) 1 calc PR A 1
C3 C 0.7319(15) 1.0647(9) 0.1977(5) 0.069(3) Uani 0.564(7) 1 d P A 1
H3A H 0.5973 0.9895 0.1707 0.103 Uiso 0.564(7) 1 calc PR A 1
H3B H 0.8330 1.0890 0.1569 0.103 Uiso 0.564(7) 1 calc PR A 1
H3C H 0.7082 1.1664 0.2235 0.103 Uiso 0.564(7) 1 calc PR A 1
C4 C 1.1167(12) 0.9705(11) 0.2569(7) 0.082(3) Uani 0.564(7) 1 d P A 1
H4A H 1.1178 0.9610 0.1971 0.122 Uiso 0.564(7) 1 calc PR A 1
H4B H 1.1590 0.8804 0.2761 0.122 Uiso 0.564(7) 1 calc PR A 1
H4C H 1.2163 1.0750 0.2832 0.122 Uiso 0.564(7) 1 calc PR A 1
C2A C 0.701(3) 1.0946(17) 0.3349(15) 0.129(8) Uani 0.436(7) 1 d P A 2
H2AA H 0.5779 1.0923 0.2976 0.194 Uiso 0.436(7) 1 calc PR A 2
H2AB H 0.7940 1.2070 0.3488 0.194 Uiso 0.436(7) 1 calc PR A 2
H2AC H 0.6520 1.0544 0.3852 0.194 Uiso 0.436(7) 1 calc PR A 2
C3A C 0.9693(18) 1.0358(12) 0.2022(6) 0.069(4) Uani 0.436(7) 1 d P A 2
H3AA H 0.8613 1.0268 0.1569 0.103 Uiso 0.436(7) 1 calc PR A 2
H3AB H 1.0646 0.9724 0.1841 0.103 Uiso 0.436(7) 1 calc PR A 2
H3AC H 1.0511 1.1509 0.2191 0.103 Uiso 0.436(7) 1 calc PR A 2
C4A C 1.0882(19) 0.9879(14) 0.3718(7) 0.086(4) Uani 0.436(7) 1 d P A 2
H4AA H 1.0615 0.8891 0.3975 0.129 Uiso 0.436(7) 1 calc PR A 2
H4AB H 1.0972 1.0824 0.4135 0.129 Uiso 0.436(7) 1 calc PR A 2
H4AC H 1.2222 1.0051 0.3470 0.129 Uiso 0.436(7) 1 calc PR A 2
C5 C 0.8725(8) 0.6307(8) 0.4224(3) 0.0910(19) Uani 1 1 d . A .
H5A H 0.8386 0.5792 0.4713 0.136 Uiso 1 1 calc R . .
H5B H 0.9710 0.7408 0.4391 0.136 Uiso 1 1 calc R . .
H5C H 0.9385 0.5648 0.3857 0.136 Uiso 1 1 calc R . .
C6 C 0.4391(8) 0.4363(6) 0.3396(3) 0.0814(16) Uani 1 1 d . A .
H6A H 0.4159 0.3847 0.3890 0.122 Uiso 1 1 calc R . .
H6B H 0.4988 0.3708 0.3001 0.122 Uiso 1 1 calc R . .
H6C H 0.3037 0.4431 0.3149 0.122 Uiso 1 1 calc R . .
C7 C 0.4974(7) 0.7638(7) 0.4396(3) 0.0706(13) Uani 1 1 d . A .
H7A H 0.4748 0.7137 0.4895 0.106 Uiso 1 1 calc R . .
H7B H 0.3606 0.7636 0.4129 0.106 Uiso 1 1 calc R . .
H7C H 0.5891 0.8766 0.4543 0.106 Uiso 1 1 calc R . .
C8 C 0.6804(6) 0.6802(4) 0.0924(2) 0.0418(8) Uani 1 1 d . . .
C9 C 0.8418(6) 0.7137(5) 0.0423(2) 0.0543(10) Uani 1 1 d . . .
H9 H 0.9723 0.6936 0.0571 0.065 Uiso 1 1 calc R . .
C10 C 0.8155(7) 0.7759(6) -0.0289(3) 0.0626(11) Uani 1 1 d . . .
H10 H 0.9280 0.7986 -0.0627 0.075 Uiso 1 1 calc R . .
C11 C 0.6286(7) 0.8051(5) -0.0512(2) 0.0580(11) Uani 1 1 d . . .
H11 H 0.6117 0.8493 -0.1001 0.070 Uiso 1 1 calc R . .
C12 C 0.4640(7) 0.7701(6) -0.0025(3) 0.0636(12) Uani 1 1 d . . .
H12 H 0.3341 0.7909 -0.0177 0.076 Uiso 1 1 calc R . .
C13 C 0.4885(6) 0.7053(5) 0.0679(3) 0.0567(10) Uani 1 1 d . . .
H13 H 0.3733 0.6774 0.1001 0.068 Uiso 1 1 calc R . .

loop_
 _atom_site_aniso_label
 _atom_site_aniso_U_11
 _atom_site_aniso_U_22
 _atom_site_aniso_U_33
 _atom_site_aniso_U_23
 _atom_site_aniso_U_13
 _atom_site_aniso_U_12
P 0.0714(7) 0.0326(5) 0.0472(6) 0.0070(4) 0.0174(5) 0.0198(5)
B 0.165(8) 0.130(7) 0.074(4) 0.039(4) 0.044(5) 0.126(7)
Si1 0.0501(7) 0.0288(5) 0.0734(8) 0.0042(5) 0.0197(5) 0.0065(4)
Si2 0.0333(5) 0.0508(6) 0.0432(6) 0.0166(4) 0.0035(4) 0.0090(4)
C1 0.0309(16) 0.0322(17) 0.0375(17) 0.0051(13) 0.0085(13) 0.0072(13)
C2 0.128(10) 0.048(5) 0.061(6) -0.017(4) 0.017(6) 0.007(6)
C3 0.101(7) 0.041(4) 0.062(5) 0.020(4) -0.003(4) 0.015(4)
C4 0.040(4) 0.062(6) 0.123(8) 0.003(5) 0.010(5) -0.011(4)
C2A 0.156(17) 0.042(7) 0.22(2) 0.033(11) 0.107(15) 0.057(10)
C3A 0.087(8) 0.045(6) 0.054(6) 0.013(4) 0.010(5) -0.018(5)
C4A 0.094(9) 0.057(7) 0.080(8) 0.026(6) -0.036(6) -0.017(6)
C5 0.068(3) 0.164(6) 0.056(3) 0.014(3) -0.007(2) 0.064(4)
C6 0.089(4) 0.068(3) 0.070(3) 0.033(3) 0.006(3) -0.013(3)
C7 0.064(3) 0.108(4) 0.052(2) 0.027(2) 0.029(2) 0.033(3)
C8 0.048(2) 0.0353(19) 0.0403(19) -0.0026(14) 0.0109(15) 0.0119(16)
C9 0.050(2) 0.064(3) 0.054(2) 0.0079(19) 0.0137(18) 0.022(2)
C10 0.065(3) 0.076(3) 0.053(2) 0.013(2) 0.021(2) 0.026(2)
C11 0.076(3) 0.056(3) 0.039(2) 0.0053(18) 0.0049(19) 0.017(2)
C12 0.056(3) 0.075(3) 0.063(3) 0.012(2) 0.005(2) 0.025(2)
C13 0.045(2) 0.063(3) 0.061(3) 0.010(2) 0.0130(18) 0.0121(19)

_geom_special_details
;
 All esds (except the esd in the dihedral angle between two l.s. planes)
 are estimated using the full covariance matrix.  The cell esds are taken
 into account individually in the estimation of esds in distances, angles
 and torsion angles; correlations between esds in cell parameters are only
 used when they are defined by crystal symmetry.  An approximate (isotropic)
 treatment of cell esds is used for estimating esds involving l.s. planes.
;

loop_
 _geom_bond_atom_site_label_1
 _geom_bond_atom_site_label_2
 _geom_bond_distance
 _geom_bond_site_symmetry_2
 _geom_bond_publ_flag
P H1P 1.35(4) . ?
P B 1.920(7) . ?
P C1 1.814(4) . ?
P C8 1.805(4) . ?
B H1A 1.17(6) . ?
B H1B 1.04(6) . ?
B H1C 1.04(5) . ?
Si1 C1 1.898(4) . ?
Si1 C2 1.765(9) . ?
Si1 C3 1.995(7) . ?
Si1 C4 1.835(8) . ?
Si1 C2A 1.862(12) . ?
Si1 C3A 1.712(9) . ?
Si1 C4A 2.023(10) . ?
Si2 C1 1.910(4) . ?
Si2 C5 1.852(4) . ?
Si2 C6 1.852(5) . ?
Si2 C7 1.864(5) . ?
C1 H1 1.000 . ?
C2 H2A 0.980 . ?
C2 H2B 0.980 . ?
C2 H2C 0.980 . ?
C3 H3A 0.980 . ?
C3 H3B 0.980 . ?
C3 H3C 0.980 . ?
C4 H4A 0.980 . ?
C4 H4B 0.980 . ?
C4 H4C 0.980 . ?
C2A H2AA 0.980 . ?
C2A H2AB 0.980 . ?
C2A H2AC 0.980 . ?
C3A H3AA 0.980 . ?
C3A H3AB 0.980 . ?
C3A H3AC 0.980 . ?
C4A H4AA 0.980 . ?
C4A H4AB 0.980 . ?
C4A H4AC 0.980 . ?
C5 H5A 0.980 . ?
C5 H5B 0.980 . ?
C5 H5C 0.980 . ?
C6 H6A 0.980 . ?
C6 H6B 0.980 . ?
C6 H6C 0.980 . ?
C7 H7A 0.980 . ?
C7 H7B 0.980 . ?
C7 H7C 0.980 . ?
C8 C9 1.381(5) . ?
C8 C13 1.390(5) . ?
C9 H9 0.950 . ?
C9 C10 1.375(6) . ?
C10 H10 0.950 . ?
C10 C11 1.366(6) . ?
C11 H11 0.950 . ?
C11 C12 1.382(6) . ?
C12 H12 0.950 . ?
C12 C13 1.375(6) . ?
C13 H13 0.950 . ?

loop_
 _geom_angle_atom_site_label_1
 _geom_angle_atom_site_label_2
 _geom_angle_atom_site_label_3
 _geom_angle
 _geom_angle_site_symmetry_1
 _geom_angle_site_symmetry_3
 _geom_angle_publ_flag
H1P P B 118.1(15) . . ?
H1P P C1 98.8(15) . . ?
H1P P C8 97.2(14) . . ?
B P C1 117.7(3) . . ?
B P C8 113.9(3) . . ?
C1 P C8 108.34(17) . . ?
P B H1A 106(3) . . ?
P B H1B 105(3) . . ?
P B H1C 96(3) . . ?
H1A B H1B 113(5) . . ?
H1A B H1C 126(5) . . ?
H1B B H1C 108(4) . . ?
C1 Si1 C2 115.7(4) . . ?
C1 Si1 C3 105.7(3) . . ?
C1 Si1 C4 112.1(3) . . ?
C1 Si1 C2A 106.7(6) . . ?
C1 Si1 C3A 120.5(4) . . ?
C1 Si1 C4A 108.1(3) . . ?
C2 Si1 C3 104.4(5) . . ?
C2 Si1 C4 113.4(5) . . ?
C3 Si1 C4 104.1(4) . . ?
C2A Si1 C3A 113.2(7) . . ?
C2A Si1 C4A 101.4(10) . . ?
C3A Si1 C4A 105.2(5) . . ?
C1 Si2 C5 113.9(2) . . ?
C1 Si2 C6 108.9(2) . . ?
C1 Si2 C7 109.11(19) . . ?
C5 Si2 C6 108.8(3) . . ?
C5 Si2 C7 108.9(2) . . ?
C6 Si2 C7 107.0(3) . . ?
P C1 Si1 114.88(18) . . ?
P C1 Si2 111.39(18) . . ?
P C1 H1 103.7 . . ?
Si1 C1 Si2 117.38(18) . . ?
Si1 C1 H1 103.7 . . ?
Si2 C1 H1 103.7 . . ?
Si1 C2 H2A 109.5 . . ?
Si1 C2 H2B 109.5 . . ?
Si1 C2 H2C 109.5 . . ?
H2A C2 H2B 109.5 . . ?
H2A C2 H2C 109.5 . . ?
H2B C2 H2C 109.5 . . ?
Si1 C3 H3A 109.5 . . ?
Si1 C3 H3B 109.5 . . ?
Si1 C3 H3C 109.5 . . ?
H3A C3 H3B 109.5 . . ?
H3A C3 H3C 109.5 . . ?
H3B C3 H3C 109.5 . . ?
Si1 C4 H4A 109.5 . . ?
Si1 C4 H4B 109.5 . . ?
Si1 C4 H4C 109.5 . . ?
H4A C4 H4B 109.5 . . ?
H4A C4 H4C 109.5 . . ?
H4B C4 H4C 109.5 . . ?
Si1 C2A H2AA 109.5 . . ?
Si1 C2A H2AB 109.5 . . ?
Si1 C2A H2AC 109.5 . . ?
H2AA C2A H2AB 109.5 . . ?
H2AA C2A H2AC 109.5 . . ?
H2AB C2A H2AC 109.5 . . ?
Si1 C3A H3AA 109.5 . . ?
Si1 C3A H3AB 109.5 . . ?
Si1 C3A H3AC 109.5 . . ?
H3AA C3A H3AB 109.5 . . ?
H3AA C3A H3AC 109.5 . . ?
H3AB C3A H3AC 109.5 . . ?
Si1 C4A H4AA 109.5 . . ?
Si1 C4A H4AB 109.5 . . ?
Si1 C4A H4AC 109.5 . . ?
H4AA C4A H4AB 109.5 . . ?
H4AA C4A H4AC 109.5 . . ?
H4AB C4A H4AC 109.5 . . ?
Si2 C5 H5A 109.5 . . ?
Si2 C5 H5B 109.5 . . ?
Si2 C5 H5C 109.5 . . ?
H5A C5 H5B 109.5 . . ?
H5A C5 H5C 109.5 . . ?
H5B C5 H5C 109.5 . . ?
Si2 C6 H6A 109.5 . . ?
Si2 C6 H6B 109.5 . . ?
Si2 C6 H6C 109.5 . . ?
H6A C6 H6B 109.5 . . ?
H6A C6 H6C 109.5 . . ?
H6B C6 H6C 109.5 . . ?
Si2 C7 H7A 109.5 . . ?
Si2 C7 H7B 109.5 . . ?
Si2 C7 H7C 109.5 . . ?
H7A C7 H7B 109.5 . . ?
H7A C7 H7C 109.5 . . ?
H7B C7 H7C 109.5 . . ?
P C8 C9 120.4(3) . . ?
P C8 C13 121.0(3) . . ?
C9 C8 C13 118.6(4) . . ?
C8 C9 H9 119.7 . . ?
C8 C9 C10 120.7(4) . . ?
H9 C9 C10 119.7 . . ?
C9 C10 H10 119.8 . . ?
C9 C10 C11 120.4(4) . . ?
H10 C10 C11 119.8 . . ?
C10 C11 H11 120.1 . . ?
C10 C11 C12 119.8(4) . . ?
H11 C11 C12 120.1 . . ?
C11 C12 H12 120.0 . . ?
C11 C12 C13 120.0(4) . . ?
H12 C12 C13 120.0 . . ?
C8 C13 C12 120.5(4) . . ?
C8 C13 H13 119.7 . . ?
C12 C13 H13 119.7 . . ?

loop_
 _geom_torsion_atom_site_label_1
 _geom_torsion_atom_site_label_2
 _geom_torsion_atom_site_label_3
 _geom_torsion_atom_site_label_4
 _geom_torsion
 _geom_torsion_site_symmetry_1
 _geom_torsion_site_symmetry_2
 _geom_torsion_site_symmetry_3
 _geom_torsion_site_symmetry_4
 _geom_torsion_publ_flag
B P C1 Si1 70.9(4) . . . . ?
B P C1 Si2 -65.7(4) . . . . ?
C8 P C1 Si1 -60.1(2) . . . . ?
C8 P C1 Si2 163.35(17) . . . . ?
C2 Si1 C1 P -166.2(5) . . . . ?
C2 Si1 C1 Si2 -32.3(6) . . . . ?
C3 Si1 C1 P 78.9(3) . . . . ?
C3 Si1 C1 Si2 -147.2(3) . . . . ?
C4 Si1 C1 P -34.0(4) . . . . ?
C4 Si1 C1 Si2 99.9(4) . . . . ?
C2A Si1 C1 P 154.5(9) . . . . ?
C2A Si1 C1 Si2 -71.6(9) . . . . ?
C3A Si1 C1 P 23.7(6) . . . . ?
C3A Si1 C1 Si2 157.5(5) . . . . ?
C4A Si1 C1 P -97.1(5) . . . . ?
C4A Si1 C1 Si2 36.8(5) . . . . ?
C5 Si2 C1 P 75.1(3) . . . . ?
C5 Si2 C1 Si1 -60.3(3) . . . . ?
C6 Si2 C1 P -46.6(3) . . . . ?
C6 Si2 C1 Si1 178.0(2) . . . . ?
C7 Si2 C1 P -163.0(2) . . . . ?
C7 Si2 C1 Si1 61.6(3) . . . . ?
B P C8 C9 -10.2(5) . . . . ?
B P C8 C13 169.4(5) . . . . ?
C1 P C8 C9 122.8(3) . . . . ?
C1 P C8 C13 -57.5(4) . . . . ?
P C8 C9 C10 -178.2(3) . . . . ?
C13 C8 C9 C10 2.2(6) . . . . ?
C8 C9 C10 C11 -0.2(7) . . . . ?
C9 C10 C11 C12 -0.8(7) . . . . ?
C10 C11 C12 C13 -0.4(7) . . . . ?
C11 C12 C13 C8 2.4(7) . . . . ?
P C8 C13 C12 177.0(3) . . . . ?
C9 C8 C13 C12 -3.3(6) . . . . ?

_diffrn_measured_fraction_theta_max    0.988
_diffrn_reflns_theta_full              27.50
_diffrn_measured_fraction_theta_full   0.988
_refine_diff_density_max    0.576
_refine_diff_density_min   -0.308
_refine_diff_density_rms    0.078

#===END


data_ki319_compound_13

_audit_creation_method            SHELXL-97
_chemical_name_systematic
;
 ?
;
_chemical_name_common             ?
_chemical_melting_point           ?
_chemical_formula_moiety          'C21 H43 B Li O2 P Si2'
_chemical_formula_sum             'C21 H43 B Li O2 P Si2'
_chemical_formula_weight          432.45

loop_
 _atom_type_symbol
 _atom_type_description
 _atom_type_scat_dispersion_real
 _atom_type_scat_dispersion_imag
 _atom_type_scat_source
 'C'  'C'   0.0033   0.0016
 'International Tables Vol C Tables 4.2.6.8 and 6.1.1.4'
 'H'  'H'   0.0000   0.0000
 'International Tables Vol C Tables 4.2.6.8 and 6.1.1.4'
 'Li'  'Li'  -0.0003   0.0001
 'International Tables Vol C Tables 4.2.6.8 and 6.1.1.4'
 'B'  'B'   0.0013   0.0007
 'International Tables Vol C Tables 4.2.6.8 and 6.1.1.4'
 'Si'  'Si'   0.0817   0.0704
 'International Tables Vol C Tables 4.2.6.8 and 6.1.1.4'
 'P'  'P'   0.1023   0.0942
 'International Tables Vol C Tables 4.2.6.8 and 6.1.1.4'
 'O'  'O'   0.0106   0.0060
 'International Tables Vol C Tables 4.2.6.8 and 6.1.1.4'

_symmetry_cell_setting            triclinic
_symmetry_space_group_name_H-M    'P -1'

loop_
 _symmetry_equiv_pos_as_xyz
 'x, y, z'
 '-x, -y, -z'

_cell_length_a                    6.2819(4)
_cell_length_b                    10.6424(7)
_cell_length_c                    19.6382(14)
_cell_angle_alpha                 96.9636(7)
_cell_angle_beta                  93.8785(8)
_cell_angle_gamma                 101.6636(8)
_cell_volume                      1270.56(15)
_cell_formula_units_Z             2
_cell_measurement_temperature     120(2)
_cell_measurement_reflns_used     4924
_cell_measurement_theta_min       3.25
_cell_measurement_theta_max       29.50

_exptl_crystal_description        block
_exptl_crystal_colour             colourless
_exptl_crystal_size_max           0.04
_exptl_crystal_size_mid           0.02
_exptl_crystal_size_min           0.02
_exptl_crystal_density_meas       ?
_exptl_crystal_density_diffrn     1.130
_exptl_crystal_density_method     'not measured'
_exptl_crystal_F_000              472
_exptl_absorpt_coefficient_mu     0.216
_exptl_absorpt_correction_type    multi-scan
_exptl_absorpt_correction_T_min   0.991
_exptl_absorpt_correction_T_max   0.996
_exptl_absorpt_process_details    SADABS

_exptl_special_details
;
 ?
;

_diffrn_ambient_temperature       120(2)
_diffrn_radiation_wavelength      0.6941
_diffrn_radiation_type            synchrotron
_diffrn_radiation_source          'Daresbury SRS station 9.8'
_diffrn_radiation_monochromator   'silicon 111'
_diffrn_measurement_device_type   'Bruker APEX2 CCD diffractometer'
_diffrn_measurement_method        'thin-slice \w scans'
_diffrn_detector_area_resol_mean  ?
_diffrn_reflns_number             13027
_diffrn_reflns_av_R_equivalents   0.0219
_diffrn_reflns_av_sigmaI/netI     0.0382
_diffrn_reflns_limit_h_min        -8
_diffrn_reflns_limit_h_max        8
_diffrn_reflns_limit_k_min        -14
_diffrn_reflns_limit_k_max        15
_diffrn_reflns_limit_l_min        -28
_diffrn_reflns_limit_l_max        27
_diffrn_reflns_theta_min          2.61
_diffrn_reflns_theta_max          29.74
_reflns_number_total              7013
_reflns_number_gt                 5706
_reflns_threshold_expression      I>2\s(I)

_computing_data_collection        'Bruker APEX2'
_computing_cell_refinement        'Bruker APEX2'
_computing_data_reduction         'Bruker APEX2'
_computing_structure_solution     'Bruker SHELXTL'
_computing_structure_refinement   'Bruker SHELXTL'
_computing_molecular_graphics     'Bruker SHELXTL'
_computing_publication_material   'Bruker SHELXTL and local programs'

_refine_special_details
;
 Refinement of F^2^ against ALL reflections.  The weighted R-factor wR and
 goodness of fit S are based on F^2^, conventional R-factors R are based
 on F, with F set to zero for negative F^2^. The threshold expression of
 F^2^ > 2sigma(F^2^) is used only for calculating R-factors(gt) etc. and is
 not relevant to the choice of reflections for refinement.  R-factors based
 on F^2^ are statistically about twice as large as those based on F, and R-
 factors based on ALL data will be even larger.
;

_refine_ls_structure_factor_coef  Fsqd
_refine_ls_matrix_type            full
_refine_ls_weighting_scheme       calc
_refine_ls_weighting_details
 'calc w=1/[\s^2^(Fo^2^)+(0.0750P)^2^+0.1528P] where P=(Fo^2^+2Fc^2^)/3'
_atom_sites_solution_primary      direct
_atom_sites_solution_secondary    difmap
_atom_sites_solution_hydrogens    mixed
_refine_ls_hydrogen_treatment     mixed
_refine_ls_extinction_method      none
_refine_ls_extinction_coef        ?
_refine_ls_number_reflns          7013
_refine_ls_number_parameters      271
_refine_ls_number_restraints      0
_refine_ls_R_factor_all           0.0550
_refine_ls_R_factor_gt            0.0434
_refine_ls_wR_factor_ref          0.1231
_refine_ls_wR_factor_gt           0.1157
_refine_ls_goodness_of_fit_ref    1.031
_refine_ls_restrained_S_all       1.031
_refine_ls_shift/su_max           0.001
_refine_ls_shift/su_mean          0.000

loop_
 _atom_site_label
 _atom_site_type_symbol
 _atom_site_fract_x
 _atom_site_fract_y
 _atom_site_fract_z
 _atom_site_U_iso_or_equiv
 _atom_site_adp_type
 _atom_site_occupancy
 _atom_site_symmetry_multiplicity
 _atom_site_calc_flag
 _atom_site_refinement_flags
 _atom_site_disorder_assembly
 _atom_site_disorder_group
Li Li 0.1934(5) 0.1138(3) 0.23700(13) 0.0253(5) Uani 1 1 d . . .
P P 0.60756(6) 0.26423(3) 0.253786(18) 0.01842(9) Uani 1 1 d . . .
B B 0.8630(3) 0.19962(17) 0.22480(9) 0.0241(3) Uani 1 1 d . . .
H1A H 1.030(3) 0.2666(17) 0.2443(9) 0.024(4) Uiso 1 1 d . . .
H1B H 0.846(3) 0.1028(18) 0.2457(9) 0.028(5) Uiso 1 1 d . . .
H1C H 0.838(3) 0.177(2) 0.1657(11) 0.036(5) Uiso 1 1 d . . .
Si1 Si 0.80895(7) 0.57531(4) 0.27634(2) 0.02094(10) Uani 1 1 d . . .
Si2 Si 0.59449(7) 0.41841(4) 0.13042(2) 0.02124(10) Uani 1 1 d . . .
O1 O 0.22307(18) 0.01843(11) 0.31678(5) 0.0265(2) Uani 1 1 d . . .
O2 O 0.17627(18) -0.01854(11) 0.15782(6) 0.0264(2) Uani 1 1 d . . .
C1 C 0.6122(2) 0.42931(13) 0.22755(7) 0.0191(3) Uani 1 1 d . . .
H1 H 0.4665 0.4458 0.2387 0.023 Uiso 1 1 calc R . .
C2 C 0.7272(3) 0.62079(15) 0.36459(8) 0.0297(3) Uani 1 1 d . . .
H2A H 0.8026 0.7098 0.3825 0.044 Uiso 1 1 calc R . .
H2B H 0.7672 0.5617 0.3954 0.044 Uiso 1 1 calc R . .
H2C H 0.5690 0.6147 0.3620 0.044 Uiso 1 1 calc R . .
C3 C 1.0966(3) 0.55393(16) 0.28507(9) 0.0310(3) Uani 1 1 d . . .
H3A H 1.1922 0.6351 0.3073 0.046 Uiso 1 1 calc R . .
H3B H 1.1420 0.5306 0.2393 0.046 Uiso 1 1 calc R . .
H3C H 1.1066 0.4849 0.3132 0.046 Uiso 1 1 calc R . .
C4 C 0.8117(3) 0.72242(15) 0.23227(9) 0.0325(4) Uani 1 1 d . . .
H4A H 0.9152 0.7965 0.2586 0.049 Uiso 1 1 calc R . .
H4B H 0.6652 0.7413 0.2296 0.049 Uiso 1 1 calc R . .
H4C H 0.8560 0.7063 0.1857 0.049 Uiso 1 1 calc R . .
C5 C 0.8672(3) 0.43373(17) 0.09606(8) 0.0299(3) Uani 1 1 d . . .
H5A H 0.8477 0.4169 0.0456 0.045 Uiso 1 1 calc R . .
H5B H 0.9432 0.3708 0.1138 0.045 Uiso 1 1 calc R . .
H5C H 0.9538 0.5215 0.1108 0.045 Uiso 1 1 calc R . .
C6 C 0.4128(3) 0.26198(16) 0.08991(8) 0.0297(3) Uani 1 1 d . . .
H6A H 0.3868 0.2631 0.0402 0.045 Uiso 1 1 calc R . .
H6B H 0.2734 0.2507 0.1104 0.045 Uiso 1 1 calc R . .
H6C H 0.4831 0.1901 0.0979 0.045 Uiso 1 1 calc R . .
C7 C 0.4678(3) 0.55063(16) 0.10100(8) 0.0291(3) Uani 1 1 d . . .
H7A H 0.3862 0.5198 0.0557 0.044 Uiso 1 1 calc R . .
H7B H 0.5829 0.6264 0.0977 0.044 Uiso 1 1 calc R . .
H7C H 0.3684 0.5746 0.1342 0.044 Uiso 1 1 calc R . .
C8 C 0.6472(2) 0.29803(13) 0.34841(7) 0.0196(3) Uani 1 1 d . . .
C9 C 0.4736(2) 0.32430(14) 0.38472(8) 0.0231(3) Uani 1 1 d . . .
H9 H 0.3394 0.3264 0.3599 0.028 Uiso 1 1 calc R . .
C10 C 0.4932(3) 0.34725(15) 0.45607(8) 0.0278(3) Uani 1 1 d . . .
H10 H 0.3737 0.3661 0.4796 0.033 Uiso 1 1 calc R . .
C11 C 0.6860(3) 0.34282(16) 0.49318(8) 0.0299(3) Uani 1 1 d . . .
H11 H 0.6997 0.3589 0.5421 0.036 Uiso 1 1 calc R . .
C12 C 0.8583(3) 0.31478(16) 0.45852(8) 0.0293(3) Uani 1 1 d . . .
H12 H 0.9907 0.3107 0.4837 0.035 Uiso 1 1 calc R . .
C13 C 0.8391(2) 0.29246(15) 0.38685(8) 0.0242(3) Uani 1 1 d . . .
H13 H 0.9590 0.2731 0.3637 0.029 Uiso 1 1 calc R . .
C14 C 0.1007(3) 0.01300(17) 0.37611(8) 0.0309(3) Uani 1 1 d . . .
H14A H -0.0528 -0.0324 0.3625 0.037 Uiso 1 1 calc R . .
H14B H 0.1023 0.1015 0.3989 0.037 Uiso 1 1 calc R . .
C15 C 0.2110(3) -0.0604(2) 0.42402(10) 0.0416(4) Uani 1 1 d . . .
H15A H 0.1431 -0.1540 0.4160 0.050 Uiso 1 1 calc R . .
H15B H 0.2040 -0.0264 0.4728 0.050 Uiso 1 1 calc R . .
C16 C 0.4440(3) -0.03624(18) 0.40523(9) 0.0356(4) Uani 1 1 d . . .
H16A H 0.5290 0.0490 0.4279 0.043 Uiso 1 1 calc R . .
H16B H 0.5185 -0.1052 0.4173 0.043 Uiso 1 1 calc R . .
C17 C 0.4089(3) -0.03945(16) 0.32817(9) 0.0299(3) Uani 1 1 d . . .
H17A H 0.5394 0.0106 0.3106 0.036 Uiso 1 1 calc R . .
H17B H 0.3790 -0.1297 0.3046 0.036 Uiso 1 1 calc R . .
C18 C 0.3561(3) -0.07956(18) 0.14386(9) 0.0354(4) Uani 1 1 d . . .
H18A H 0.3539 -0.1532 0.1703 0.043 Uiso 1 1 calc R . .
H18B H 0.4970 -0.0169 0.1562 0.043 Uiso 1 1 calc R . .
C19 C 0.3240(3) -0.12625(18) 0.06721(9) 0.0378(4) Uani 1 1 d . . .
H19A H 0.3931 -0.2008 0.0554 0.045 Uiso 1 1 calc R . .
H19B H 0.3831 -0.0561 0.0404 0.045 Uiso 1 1 calc R . .
C20 C 0.0775(3) -0.16550(17) 0.05500(9) 0.0356(4) Uani 1 1 d . . .
H20A H 0.0230 -0.2525 0.0680 0.043 Uiso 1 1 calc R . .
H20B H 0.0265 -0.1652 0.0062 0.043 Uiso 1 1 calc R . .
C21 C 0.0049(3) -0.06106(16) 0.10216(8) 0.0300(3) Uani 1 1 d . . .
H21A H -0.0138 0.0119 0.0771 0.036 Uiso 1 1 calc R . .
H21B H -0.1352 -0.0966 0.1200 0.036 Uiso 1 1 calc R . .

loop_
 _atom_site_aniso_label
 _atom_site_aniso_U_11
 _atom_site_aniso_U_22
 _atom_site_aniso_U_33
 _atom_site_aniso_U_23
 _atom_site_aniso_U_13
 _atom_site_aniso_U_12
Li 0.0302(13) 0.0265(13) 0.0207(12) 0.0022(9) 0.0034(10) 0.0100(10)
P 0.01831(17) 0.01983(17) 0.01765(17) 0.00138(12) 0.00136(12) 0.00611(13)
B 0.0235(8) 0.0269(8) 0.0236(8) 0.0023(6) 0.0039(6) 0.0098(6)
Si1 0.02069(19) 0.02065(19) 0.02138(19) 0.00157(14) 0.00187(14) 0.00499(15)
Si2 0.0209(2) 0.0256(2) 0.01810(19) 0.00310(14) 0.00194(14) 0.00707(15)
O1 0.0269(5) 0.0313(6) 0.0231(5) 0.0075(4) 0.0012(4) 0.0083(4)
O2 0.0265(5) 0.0294(5) 0.0232(5) -0.0037(4) -0.0004(4) 0.0106(4)
C1 0.0177(6) 0.0213(6) 0.0195(6) 0.0029(5) 0.0020(5) 0.0072(5)
C2 0.0349(8) 0.0258(7) 0.0245(7) -0.0038(6) 0.0043(6) 0.0016(6)
C3 0.0235(7) 0.0301(8) 0.0375(9) 0.0016(6) -0.0005(6) 0.0042(6)
C4 0.0393(9) 0.0243(7) 0.0335(8) 0.0052(6) 0.0007(7) 0.0056(7)
C5 0.0291(8) 0.0368(9) 0.0268(8) 0.0065(6) 0.0077(6) 0.0110(7)
C6 0.0318(8) 0.0324(8) 0.0218(7) 0.0000(6) -0.0020(6) 0.0035(7)
C7 0.0299(8) 0.0335(8) 0.0269(8) 0.0095(6) 0.0011(6) 0.0113(7)
C8 0.0205(6) 0.0174(6) 0.0209(6) 0.0025(5) 0.0020(5) 0.0043(5)
C9 0.0202(6) 0.0247(7) 0.0248(7) 0.0021(5) 0.0034(5) 0.0062(5)
C10 0.0287(8) 0.0279(7) 0.0269(7) 0.0008(6) 0.0097(6) 0.0056(6)
C11 0.0381(9) 0.0308(8) 0.0193(7) 0.0023(6) 0.0027(6) 0.0046(7)
C12 0.0290(8) 0.0362(8) 0.0221(7) 0.0047(6) -0.0025(6) 0.0068(6)
C13 0.0213(7) 0.0295(7) 0.0231(7) 0.0044(6) 0.0025(5) 0.0078(6)
C14 0.0355(9) 0.0333(8) 0.0273(8) 0.0079(6) 0.0072(6) 0.0119(7)
C15 0.0381(10) 0.0543(12) 0.0335(9) 0.0194(8) 0.0011(7) 0.0057(9)
C16 0.0319(9) 0.0397(9) 0.0356(9) 0.0145(7) -0.0041(7) 0.0060(7)
C17 0.0307(8) 0.0281(8) 0.0324(8) 0.0063(6) -0.0004(6) 0.0096(6)
C18 0.0311(8) 0.0373(9) 0.0382(9) -0.0071(7) 0.0003(7) 0.0161(7)
C19 0.0474(11) 0.0331(9) 0.0348(9) -0.0007(7) 0.0152(8) 0.0128(8)
C20 0.0497(11) 0.0302(8) 0.0246(8) -0.0023(6) -0.0015(7) 0.0088(8)
C21 0.0321(8) 0.0292(8) 0.0269(8) -0.0013(6) -0.0052(6) 0.0078(6)

_geom_special_details
;
 All esds (except the esd in the dihedral angle between two l.s. planes)
 are estimated using the full covariance matrix.  The cell esds are taken
 into account individually in the estimation of esds in distances, angles
 and torsion angles; correlations between esds in cell parameters are only
 used when they are defined by crystal symmetry.  An approximate (isotropic)
 treatment of cell esds is used for estimating esds involving l.s. planes.
;

loop_
 _geom_bond_atom_site_label_1
 _geom_bond_atom_site_label_2
 _geom_bond_distance
 _geom_bond_site_symmetry_2
 _geom_bond_publ_flag
Li P 2.741(3) . ?
Li H1A 2.086(18) 1_455 ?
Li H1B 2.183(19) 1_455 ?
Li O1 1.985(3) . ?
Li O2 1.949(3) . ?
P B 1.9611(17) . ?
P C1 1.8851(14) . ?
P C8 1.8395(14) . ?
B H1A 1.156(18) . ?
B H1B 1.143(18) . ?
B H1C 1.15(2) . ?
Si1 C1 1.8873(14) . ?
Si1 C2 1.8761(16) . ?
Si1 C3 1.8654(17) . ?
Si1 C4 1.8762(17) . ?
Si2 C1 1.8911(14) . ?
Si2 C5 1.8674(17) . ?
Si2 C6 1.8694(16) . ?
Si2 C7 1.8801(16) . ?
O1 C14 1.4391(19) . ?
O1 C17 1.4425(19) . ?
O2 C18 1.4381(19) . ?
O2 C21 1.4429(18) . ?
C1 H1 1.000 . ?
C2 H2A 0.980 . ?
C2 H2B 0.980 . ?
C2 H2C 0.980 . ?
C3 H3A 0.980 . ?
C3 H3B 0.980 . ?
C3 H3C 0.980 . ?
C4 H4A 0.980 . ?
C4 H4B 0.980 . ?
C4 H4C 0.980 . ?
C5 H5A 0.980 . ?
C5 H5B 0.980 . ?
C5 H5C 0.980 . ?
C6 H6A 0.980 . ?
C6 H6B 0.980 . ?
C6 H6C 0.980 . ?
C7 H7A 0.980 . ?
C7 H7B 0.980 . ?
C7 H7C 0.980 . ?
C8 C9 1.399(2) . ?
C8 C13 1.394(2) . ?
C9 H9 0.950 . ?
C9 C10 1.386(2) . ?
C10 H10 0.950 . ?
C10 C11 1.383(2) . ?
C11 H11 0.950 . ?
C11 C12 1.380(2) . ?
C12 H12 0.950 . ?
C12 C13 1.392(2) . ?
C13 H13 0.950 . ?
C14 H14A 0.990 . ?
C14 H14B 0.990 . ?
C14 C15 1.511(2) . ?
C15 H15A 0.990 . ?
C15 H15B 0.990 . ?
C15 C16 1.512(3) . ?
C16 H16A 0.990 . ?
C16 H16B 0.990 . ?
C16 C17 1.510(2) . ?
C17 H17A 0.990 . ?
C17 H17B 0.990 . ?
C18 H18A 0.990 . ?
C18 H18B 0.990 . ?
C18 C19 1.513(2) . ?
C19 H19A 0.990 . ?
C19 H19B 0.990 . ?
C19 C20 1.515(3) . ?
C20 H20A 0.990 . ?
C20 H20B 0.990 . ?
C20 C21 1.521(2) . ?
C21 H21A 0.990 . ?
C21 H21B 0.990 . ?

loop_
 _geom_angle_atom_site_label_1
 _geom_angle_atom_site_label_2
 _geom_angle_atom_site_label_3
 _geom_angle
 _geom_angle_site_symmetry_1
 _geom_angle_site_symmetry_3
 _geom_angle_publ_flag
P Li H1A 96.4(5) . 1_455 ?
P Li H1B 147.6(5) . 1_455 ?
P Li O1 97.32(11) . . ?
P Li O2 107.86(12) . . ?
H1A Li H1B 52.6(7) 1_455 1_455 ?
H1A Li O1 120.0(5) 1_455 . ?
H1A Li O2 126.8(5) 1_455 . ?
H1B Li O1 92.5(5) 1_455 . ?
H1B Li O2 99.7(5) 1_455 . ?
O1 Li O2 103.29(13) . . ?
Li P B 123.04(8) . . ?
Li P C1 111.65(7) . . ?
Li P C8 99.81(7) . . ?
B P C1 110.55(7) . . ?
B P C8 106.09(7) . . ?
C1 P C8 102.95(6) . . ?
P B H1A 115.4(9) . . ?
P B H1B 103.8(9) . . ?
P B H1C 106.6(10) . . ?
H1A B H1B 110.8(13) . . ?
H1A B H1C 112.5(14) . . ?
H1B B H1C 107.0(14) . . ?
C1 Si1 C2 111.96(7) . . ?
C1 Si1 C3 113.35(7) . . ?
C1 Si1 C4 111.20(7) . . ?
C2 Si1 C3 108.49(8) . . ?
C2 Si1 C4 104.82(8) . . ?
C3 Si1 C4 106.53(8) . . ?
C1 Si2 C5 112.74(7) . . ?
C1 Si2 C6 110.26(7) . . ?
C1 Si2 C7 110.60(7) . . ?
C5 Si2 C6 109.33(8) . . ?
C5 Si2 C7 107.37(8) . . ?
C6 Si2 C7 106.30(8) . . ?
Li O1 C14 129.22(12) . . ?
Li O1 C17 120.96(12) . . ?
C14 O1 C17 108.98(12) . . ?
Li O2 C18 121.74(12) . . ?
Li O2 C21 128.32(12) . . ?
C18 O2 C21 109.65(12) . . ?
P C1 Si1 119.62(7) . . ?
P C1 Si2 109.93(7) . . ?
P C1 H1 103.0 . . ?
Si1 C1 Si2 115.60(7) . . ?
Si1 C1 H1 103.0 . . ?
Si2 C1 H1 103.0 . . ?
Si1 C2 H2A 109.5 . . ?
Si1 C2 H2B 109.5 . . ?
Si1 C2 H2C 109.5 . . ?
H2A C2 H2B 109.5 . . ?
H2A C2 H2C 109.5 . . ?
H2B C2 H2C 109.5 . . ?
Si1 C3 H3A 109.5 . . ?
Si1 C3 H3B 109.5 . . ?
Si1 C3 H3C 109.5 . . ?
H3A C3 H3B 109.5 . . ?
H3A C3 H3C 109.5 . . ?
H3B C3 H3C 109.5 . . ?
Si1 C4 H4A 109.5 . . ?
Si1 C4 H4B 109.5 . . ?
Si1 C4 H4C 109.5 . . ?
H4A C4 H4B 109.5 . . ?
H4A C4 H4C 109.5 . . ?
H4B C4 H4C 109.5 . . ?
Si2 C5 H5A 109.5 . . ?
Si2 C5 H5B 109.5 . . ?
Si2 C5 H5C 109.5 . . ?
H5A C5 H5B 109.5 . . ?
H5A C5 H5C 109.5 . . ?
H5B C5 H5C 109.5 . . ?
Si2 C6 H6A 109.5 . . ?
Si2 C6 H6B 109.5 . . ?
Si2 C6 H6C 109.5 . . ?
H6A C6 H6B 109.5 . . ?
H6A C6 H6C 109.5 . . ?
H6B C6 H6C 109.5 . . ?
Si2 C7 H7A 109.5 . . ?
Si2 C7 H7B 109.5 . . ?
Si2 C7 H7C 109.5 . . ?
H7A C7 H7B 109.5 . . ?
H7A C7 H7C 109.5 . . ?
H7B C7 H7C 109.5 . . ?
P C8 C9 119.07(11) . . ?
P C8 C13 123.45(11) . . ?
C9 C8 C13 117.40(13) . . ?
C8 C9 H9 119.3 . . ?
C8 C9 C10 121.36(14) . . ?
H9 C9 C10 119.3 . . ?
C9 C10 H10 119.9 . . ?
C9 C10 C11 120.28(15) . . ?
H10 C10 C11 119.9 . . ?
C10 C11 H11 120.3 . . ?
C10 C11 C12 119.41(14) . . ?
H11 C11 C12 120.3 . . ?
C11 C12 H12 119.8 . . ?
C11 C12 C13 120.34(15) . . ?
H12 C12 C13 119.8 . . ?
C8 C13 C12 121.20(14) . . ?
C8 C13 H13 119.4 . . ?
C12 C13 H13 119.4 . . ?
O1 C14 H14A 110.5 . . ?
O1 C14 H14B 110.5 . . ?
O1 C14 C15 106.19(14) . . ?
H14A C14 H14B 108.7 . . ?
H14A C14 C15 110.5 . . ?
H14B C14 C15 110.5 . . ?
C14 C15 H15A 111.1 . . ?
C14 C15 H15B 111.1 . . ?
C14 C15 C16 103.18(14) . . ?
H15A C15 H15B 109.1 . . ?
H15A C15 C16 111.1 . . ?
H15B C15 C16 111.1 . . ?
C15 C16 H16A 111.6 . . ?
C15 C16 H16B 111.6 . . ?
C15 C16 C17 101.08(14) . . ?
H16A C16 H16B 109.4 . . ?
H16A C16 C17 111.6 . . ?
H16B C16 C17 111.6 . . ?
O1 C17 C16 105.53(14) . . ?
O1 C17 H17A 110.6 . . ?
O1 C17 H17B 110.6 . . ?
C16 C17 H17A 110.6 . . ?
C16 C17 H17B 110.6 . . ?
H17A C17 H17B 108.8 . . ?
O2 C18 H18A 110.7 . . ?
O2 C18 H18B 110.7 . . ?
O2 C18 C19 105.22(14) . . ?
H18A C18 H18B 108.8 . . ?
H18A C18 C19 110.7 . . ?
H18B C18 C19 110.7 . . ?
C18 C19 H19A 111.5 . . ?
C18 C19 H19B 111.5 . . ?
C18 C19 C20 101.48(14) . . ?
H19A C19 H19B 109.3 . . ?
H19A C19 C20 111.5 . . ?
H19B C19 C20 111.5 . . ?
C19 C20 H20A 111.3 . . ?
C19 C20 H20B 111.3 . . ?
C19 C20 C21 102.47(13) . . ?
H20A C20 H20B 109.2 . . ?
H20A C20 C21 111.3 . . ?
H20B C20 C21 111.3 . . ?
O2 C21 C20 105.68(13) . . ?
O2 C21 H21A 110.6 . . ?
O2 C21 H21B 110.6 . . ?
C20 C21 H21A 110.6 . . ?
C20 C21 H21B 110.6 . . ?
H21A C21 H21B 108.7 . . ?

_diffrn_measured_fraction_theta_max    0.906 
_diffrn_reflns_theta_full              25.00 
_diffrn_measured_fraction_theta_full   0.986 
_refine_diff_density_max    0.601 
_refine_diff_density_min   -0.289 
_refine_diff_density_rms    0.060 

#===END


data_ki334_compound_14

_audit_creation_method            SHELXL-97
_chemical_name_systematic
;
 ?
;
_chemical_name_common             ?
_chemical_melting_point           ?
_chemical_formula_moiety          'C16 H32 Na O8 +,C13 H27 B P Si2 -'
_chemical_formula_sum             'C29 H59 B Na O8 P Si2'
_chemical_formula_weight          656.71

loop_
 _atom_type_symbol
 _atom_type_description
 _atom_type_scat_dispersion_real
 _atom_type_scat_dispersion_imag
 _atom_type_scat_source
 'C'  'C'   0.0033   0.0016
 'International Tables Vol C Tables 4.2.6.8 and 6.1.1.4'
 'H'  'H'   0.0000   0.0000
 'International Tables Vol C Tables 4.2.6.8 and 6.1.1.4'
 'B'  'B'   0.0013   0.0007
 'International Tables Vol C Tables 4.2.6.8 and 6.1.1.4'
 'O'  'O'   0.0106   0.0060
 'International Tables Vol C Tables 4.2.6.8 and 6.1.1.4'
 'Na'  'Na'   0.0362   0.0249
 'International Tables Vol C Tables 4.2.6.8 and 6.1.1.4'
 'Si'  'Si'   0.0817   0.0704
 'International Tables Vol C Tables 4.2.6.8 and 6.1.1.4'
 'P'  'P'   0.1023   0.0942
 'International Tables Vol C Tables 4.2.6.8 and 6.1.1.4'

_symmetry_cell_setting            monoclinic
_symmetry_space_group_name_H-M    'C 2/c'

loop_
 _symmetry_equiv_pos_as_xyz
 'x, y, z'
 '-x, y, -z+1/2'
 'x+1/2, y+1/2, z'
 '-x+1/2, y+1/2, -z+1/2'
 '-x, -y, -z'
 'x, -y, z-1/2'
 '-x+1/2, -y+1/2, -z'
 'x+1/2, -y+1/2, z-1/2'

_cell_length_a                    30.851(8)
_cell_length_b                    11.927(3)
_cell_length_c                    22.254(6)
_cell_angle_alpha                 90.00
_cell_angle_beta                  114.293(3)
_cell_angle_gamma                 90.00
_cell_volume                      7464(4)
_cell_formula_units_Z             8
_cell_measurement_temperature     120(2)
_cell_measurement_reflns_used     956
_cell_measurement_theta_min       3.3
_cell_measurement_theta_max       27.0

_exptl_crystal_description        slab
_exptl_crystal_colour             colourless
_exptl_crystal_size_max           0.10
_exptl_crystal_size_mid           0.08
_exptl_crystal_size_min           0.04
_exptl_crystal_density_meas       ?
_exptl_crystal_density_diffrn     1.169
_exptl_crystal_density_method     'not measured'
_exptl_crystal_F_000              2848
_exptl_absorpt_coefficient_mu     0.191
_exptl_absorpt_correction_type    multi-scan
_exptl_absorpt_correction_T_min   0.981
_exptl_absorpt_correction_T_max   0.992
_exptl_absorpt_process_details    SADABS

_exptl_special_details
;
 ?
;

_diffrn_ambient_temperature       120(2)
_diffrn_radiation_wavelength      0.6946
_diffrn_radiation_type            synchrotron
_diffrn_radiation_source          'Daresbury SRS station 9.8'
_diffrn_radiation_monochromator   'silicon 111'
_diffrn_measurement_device_type   'Bruker APEX2 CCD diffractometer'
_diffrn_measurement_method        'thin-slice \w scans'
_diffrn_detector_area_resol_mean  ?
_diffrn_reflns_number             37659
_diffrn_reflns_av_R_equivalents   0.0420
_diffrn_reflns_av_sigmaI/netI     0.0419
_diffrn_reflns_limit_h_min        -43
_diffrn_reflns_limit_h_max        43
_diffrn_reflns_limit_k_min        -17
_diffrn_reflns_limit_k_max        17
_diffrn_reflns_limit_l_min        -31
_diffrn_reflns_limit_l_max        31
_diffrn_reflns_theta_min          2.70
_diffrn_reflns_theta_max          29.74
_reflns_number_total              10809
_reflns_number_gt                 8422
_reflns_threshold_expression      I>2\s(I)

_computing_data_collection        'Bruker APEX2'
_computing_cell_refinement        'Bruker APEX2'
_computing_data_reduction         'Bruker APEX2'
_computing_structure_solution     'Bruker SHELXTL'
_computing_structure_refinement   'Bruker SHELXTL'
_computing_molecular_graphics     'Bruker SHELXTL'
_computing_publication_material   'Bruker SHELXTL and local programs'

_refine_special_details
;
 Refinement of F^2^ against ALL reflections.  The weighted R-factor wR and
 goodness of fit S are based on F^2^, conventional R-factors R are based
 on F, with F set to zero for negative F^2^. The threshold expression of
 F^2^ > 2sigma(F^2^) is used only for calculating R-factors(gt) etc. and is
 not relevant to the choice of reflections for refinement.  R-factors based
 on F^2^ are statistically about twice as large as those based on F, and R-
 factors based on ALL data will be even larger.
;

_refine_ls_structure_factor_coef  Fsqd
_refine_ls_matrix_type            full
_refine_ls_weighting_scheme       calc
_refine_ls_weighting_details
 'calc w=1/[\s^2^(Fo^2^)+(0.0472P)^2^+2.4766P] where P=(Fo^2^+2Fc^2^)/3'
_atom_sites_solution_primary      direct
_atom_sites_solution_secondary    difmap
_atom_sites_solution_hydrogens    mixed
_refine_ls_hydrogen_treatment     mixed
_refine_ls_extinction_method      none
_refine_ls_extinction_coef        ?
_refine_ls_number_reflns          10809
_refine_ls_number_parameters      397
_refine_ls_number_restraints      0
_refine_ls_R_factor_all           0.0548
_refine_ls_R_factor_gt            0.0396
_refine_ls_wR_factor_ref          0.1020
_refine_ls_wR_factor_gt           0.0949
_refine_ls_goodness_of_fit_ref    1.025
_refine_ls_restrained_S_all       1.025
_refine_ls_shift/su_max           0.001
_refine_ls_shift/su_mean          0.000

loop_
 _atom_site_label
 _atom_site_type_symbol
 _atom_site_fract_x
 _atom_site_fract_y
 _atom_site_fract_z
 _atom_site_U_iso_or_equiv
 _atom_site_adp_type
 _atom_site_occupancy
 _atom_site_symmetry_multiplicity
 _atom_site_calc_flag
 _atom_site_refinement_flags
 _atom_site_disorder_assembly
 _atom_site_disorder_group
P P 0.630021(12) 0.17119(3) 0.697501(15) 0.02197(7) Uani 1 1 d . . .
B B 0.59840(6) 0.26842(12) 0.73875(8) 0.0274(3) Uani 1 1 d . . .
H1A H 0.6141(5) 0.2654(13) 0.7929(8) 0.031(4) Uiso 1 1 d . . .
H1B H 0.6036(5) 0.3571(13) 0.7229(8) 0.034(4) Uiso 1 1 d . . .
H1C H 0.5588(6) 0.2484(14) 0.7174(8) 0.044(5) Uiso 1 1 d . . .
Si1 Si 0.576039(14) -0.04678(3) 0.649218(19) 0.02780(9) Uani 1 1 d . . .
Si2 Si 0.634162(13) -0.00991(3) 0.806736(17) 0.02347(8) Uani 1 1 d . . .
C1 C 0.62711(4) 0.01959(10) 0.72027(6) 0.0222(2) Uani 1 1 d . . .
H1 H 0.6560 -0.0150 0.7182 0.027 Uiso 1 1 calc R . .
C2 C 0.52232(5) 0.04591(13) 0.61766(8) 0.0385(3) Uani 1 1 d . . .
H2A H 0.4970 0.0098 0.5800 0.058 Uiso 1 1 calc R . .
H2B H 0.5305 0.1179 0.6038 0.058 Uiso 1 1 calc R . .
H2C H 0.5114 0.0584 0.6527 0.058 Uiso 1 1 calc R . .
C3 C 0.59494(6) -0.07254(13) 0.58022(7) 0.0390(3) Uani 1 1 d . . .
H3A H 0.5669 -0.0895 0.5397 0.059 Uiso 1 1 calc R . .
H3B H 0.6170 -0.1360 0.5915 0.059 Uiso 1 1 calc R . .
H3C H 0.6107 -0.0055 0.5735 0.059 Uiso 1 1 calc R . .
C4 C 0.55737(6) -0.18624(13) 0.67024(8) 0.0426(4) Uani 1 1 d . . .
H4A H 0.5315 -0.2172 0.6311 0.064 Uiso 1 1 calc R . .
H4B H 0.5464 -0.1763 0.7055 0.064 Uiso 1 1 calc R . .
H4C H 0.5845 -0.2379 0.6851 0.064 Uiso 1 1 calc R . .
C5 C 0.57814(5) 0.01816(12) 0.81778(7) 0.0330(3) Uani 1 1 d . . .
H5A H 0.5676 0.0952 0.8042 0.050 Uiso 1 1 calc R . .
H5B H 0.5841 0.0083 0.8643 0.050 Uiso 1 1 calc R . .
H5C H 0.5534 -0.0343 0.7907 0.050 Uiso 1 1 calc R . .
C6 C 0.68446(5) 0.07088(11) 0.86981(7) 0.0299(3) Uani 1 1 d . . .
H6A H 0.6772 0.1512 0.8644 0.045 Uiso 1 1 calc R . .
H6B H 0.7137 0.0564 0.8639 0.045 Uiso 1 1 calc R . .
H6C H 0.6888 0.0473 0.9141 0.045 Uiso 1 1 calc R . .
C7 C 0.65104(5) -0.16160(11) 0.82624(7) 0.0309(3) Uani 1 1 d . . .
H7A H 0.6729 -0.1838 0.8066 0.046 Uiso 1 1 calc R . .
H7B H 0.6224 -0.2082 0.8081 0.046 Uiso 1 1 calc R . .
H7C H 0.6666 -0.1716 0.8741 0.046 Uiso 1 1 calc R . .
C8 C 0.69406(4) 0.20026(10) 0.74073(6) 0.0239(2) Uani 1 1 d . . .
C9 C 0.72697(5) 0.13857(11) 0.72552(7) 0.0285(3) Uani 1 1 d . . .
H9 H 0.7161 0.0768 0.6961 0.034 Uiso 1 1 calc R . .
C10 C 0.77494(5) 0.16538(13) 0.75227(7) 0.0348(3) Uani 1 1 d . . .
H10 H 0.7964 0.1223 0.7409 0.042 Uiso 1 1 calc R . .
C11 C 0.79173(5) 0.25495(14) 0.79560(8) 0.0385(3) Uani 1 1 d . . .
H11 H 0.8246 0.2734 0.8141 0.046 Uiso 1 1 calc R . .
C12 C 0.75999(5) 0.31688(12) 0.81142(7) 0.0358(3) Uani 1 1 d . . .
H12 H 0.7712 0.3780 0.8412 0.043 Uiso 1 1 calc R . .
C13 C 0.71167(5) 0.29049(11) 0.78408(7) 0.0295(3) Uani 1 1 d . . .
H13 H 0.6904 0.3346 0.7951 0.035 Uiso 1 1 calc R . .
Na Na 0.619413(18) 0.46042(4) 0.47793(2) 0.02539(11) Uani 1 1 d . . .
O1 O 0.68957(3) 0.50917(8) 0.45422(5) 0.0320(2) Uani 1 1 d . . .
O2 O 0.63725(3) 0.66587(8) 0.49250(5) 0.0297(2) Uani 1 1 d . . .
O3 O 0.55224(3) 0.57059(8) 0.40346(4) 0.02611(19) Uani 1 1 d . . .
O4 O 0.60338(3) 0.41501(8) 0.36445(4) 0.02663(19) Uani 1 1 d . . .
O5 O 0.67871(4) 0.45040(8) 0.58897(5) 0.0338(2) Uani 1 1 d . . .
O6 O 0.58043(4) 0.48984(8) 0.55379(5) 0.0300(2) Uani 1 1 d . . .
O7 O 0.56070(3) 0.30923(7) 0.46547(4) 0.02663(19) Uani 1 1 d . . .
O8 O 0.65835(3) 0.27119(8) 0.49986(5) 0.0300(2) Uani 1 1 d . . .
C14 C 0.69767(5) 0.62641(12) 0.45121(8) 0.0358(3) Uani 1 1 d . . .
H14A H 0.6773 0.6561 0.4070 0.043 Uiso 1 1 calc R . .
H14B H 0.7313 0.6403 0.4598 0.043 Uiso 1 1 calc R . .
C15 C 0.68570(5) 0.68321(12) 0.50310(8) 0.0355(3) Uani 1 1 d . . .
H15A H 0.7068 0.6537 0.5471 0.043 Uiso 1 1 calc R . .
H15B H 0.6918 0.7647 0.5028 0.043 Uiso 1 1 calc R . .
C16 C 0.60394(5) 0.73303(11) 0.44095(7) 0.0293(3) Uani 1 1 d . . .
H16A H 0.6111 0.7309 0.4015 0.035 Uiso 1 1 calc R . .
H16B H 0.6054 0.8119 0.4555 0.035 Uiso 1 1 calc R . .
C17 C 0.55562(5) 0.68438(11) 0.42540(7) 0.0298(3) Uani 1 1 d . . .
H17A H 0.5490 0.6876 0.4653 0.036 Uiso 1 1 calc R . .
H17B H 0.5313 0.7300 0.3907 0.036 Uiso 1 1 calc R . .
C18 C 0.54203(5) 0.56018(12) 0.33481(6) 0.0289(3) Uani 1 1 d . . .
H18A H 0.5611 0.6147 0.3223 0.035 Uiso 1 1 calc R . .
H18B H 0.5079 0.5747 0.3077 0.035 Uiso 1 1 calc R . .
C19 C 0.55477(5) 0.44143(11) 0.32406(7) 0.0297(3) Uani 1 1 d . . .
H19A H 0.5339 0.3884 0.3340 0.036 Uiso 1 1 calc R . .
H19B H 0.5488 0.4318 0.2771 0.036 Uiso 1 1 calc R . .
C20 C 0.63648(5) 0.46073(11) 0.34122(7) 0.0301(3) Uani 1 1 d . . .
H20A H 0.6292 0.5407 0.3294 0.036 Uiso 1 1 calc R . .
H20B H 0.6348 0.4195 0.3017 0.036 Uiso 1 1 calc R . .
C21 C 0.68542(5) 0.44887(12) 0.39665(8) 0.0333(3) Uani 1 1 d . . .
H21A H 0.6920 0.3685 0.4078 0.040 Uiso 1 1 calc R . .
H21B H 0.7095 0.4770 0.3816 0.040 Uiso 1 1 calc R . .
C22 C 0.68809(5) 0.25330(12) 0.56811(7) 0.0335(3) Uani 1 1 d . . .
H22A H 0.7121 0.1949 0.5730 0.040 Uiso 1 1 calc R . .
H22B H 0.6687 0.2283 0.5918 0.040 Uiso 1 1 calc R . .
C23 C 0.71226(5) 0.36324(13) 0.59608(8) 0.0377(3) Uani 1 1 d . . .
H23A H 0.7331 0.3533 0.6434 0.045 Uiso 1 1 calc R . .
H23B H 0.7325 0.3855 0.5732 0.045 Uiso 1 1 calc R . .
C24 C 0.65933(6) 0.44677(12) 0.63733(7) 0.0360(3) Uani 1 1 d . . .
H24A H 0.6835 0.4708 0.6807 0.043 Uiso 1 1 calc R . .
H24B H 0.6493 0.3694 0.6416 0.043 Uiso 1 1 calc R . .
C25 C 0.61727(6) 0.52447(12) 0.61519(7) 0.0363(3) Uani 1 1 d . . .
H25A H 0.6045 0.5268 0.6493 0.044 Uiso 1 1 calc R . .
H25B H 0.6277 0.6011 0.6104 0.044 Uiso 1 1 calc R . .
C26 C 0.55323(5) 0.39636(12) 0.55977(7) 0.0309(3) Uani 1 1 d . . .
H26A H 0.5298 0.4215 0.5768 0.037 Uiso 1 1 calc R . .
H26B H 0.5744 0.3400 0.5906 0.037 Uiso 1 1 calc R . .
C27 C 0.52800(5) 0.34645(12) 0.49183(7) 0.0307(3) Uani 1 1 d . . .
H27A H 0.5084 0.2822 0.4940 0.037 Uiso 1 1 calc R . .
H27B H 0.5065 0.4033 0.4620 0.037 Uiso 1 1 calc R . .
C28 C 0.58133(5) 0.20248(11) 0.49045(7) 0.0276(3) Uani 1 1 d . . .
H28A H 0.5576 0.1421 0.4710 0.033 Uiso 1 1 calc R . .
H28B H 0.5924 0.2002 0.5390 0.033 Uiso 1 1 calc R . .
C29 C 0.62270(5) 0.18719(11) 0.47164(7) 0.0302(3) Uani 1 1 d . . .
H29A H 0.6370 0.1124 0.4865 0.036 Uiso 1 1 calc R . .
H29B H 0.6109 0.1898 0.4230 0.036 Uiso 1 1 calc R . .

loop_
 _atom_site_aniso_label
 _atom_site_aniso_U_11
 _atom_site_aniso_U_22
 _atom_site_aniso_U_33
 _atom_site_aniso_U_23
 _atom_site_aniso_U_13
 _atom_site_aniso_U_12
P 0.02634(16) 0.01926(15) 0.02104(15) -0.00026(11) 0.01050(12) -0.00011(11)
B 0.0339(8) 0.0232(7) 0.0268(7) -0.0009(6) 0.0143(6) 0.0040(6)
Si1 0.03199(19) 0.02241(17) 0.02615(18) -0.00339(14) 0.00908(15) -0.00232(14)
Si2 0.02762(18) 0.02135(17) 0.02384(17) 0.00118(13) 0.01302(14) 0.00067(13)
C1 0.0253(6) 0.0184(5) 0.0246(6) -0.0001(4) 0.0121(5) -0.0005(4)
C2 0.0281(7) 0.0364(8) 0.0432(9) -0.0050(6) 0.0068(6) -0.0023(6)
C3 0.0539(9) 0.0338(8) 0.0262(7) -0.0039(6) 0.0134(7) 0.0062(7)
C4 0.0496(9) 0.0310(8) 0.0402(9) -0.0046(6) 0.0114(7) -0.0132(7)
C5 0.0348(7) 0.0346(7) 0.0361(8) 0.0016(6) 0.0211(6) 0.0017(6)
C6 0.0347(7) 0.0279(7) 0.0244(6) 0.0008(5) 0.0093(5) 0.0006(5)
C7 0.0382(7) 0.0255(6) 0.0337(7) 0.0046(5) 0.0195(6) 0.0027(5)
C8 0.0275(6) 0.0218(6) 0.0225(6) 0.0041(5) 0.0103(5) -0.0017(5)
C9 0.0314(7) 0.0263(6) 0.0291(7) 0.0041(5) 0.0137(5) -0.0001(5)
C10 0.0299(7) 0.0368(8) 0.0400(8) 0.0137(6) 0.0165(6) 0.0041(6)
C11 0.0288(7) 0.0434(8) 0.0378(8) 0.0141(7) 0.0080(6) -0.0059(6)
C12 0.0389(8) 0.0319(7) 0.0305(7) 0.0028(6) 0.0081(6) -0.0107(6)
C13 0.0360(7) 0.0259(6) 0.0267(6) 0.0010(5) 0.0130(5) -0.0043(5)
Na 0.0267(3) 0.0250(3) 0.0228(2) 0.00330(19) 0.0085(2) -0.00150(19)
O1 0.0307(5) 0.0261(5) 0.0380(5) 0.0051(4) 0.0129(4) -0.0017(4)
O2 0.0308(5) 0.0292(5) 0.0267(5) 0.0024(4) 0.0094(4) -0.0036(4)
O3 0.0286(5) 0.0272(5) 0.0227(4) 0.0011(4) 0.0107(4) 0.0008(4)
O4 0.0284(5) 0.0258(4) 0.0269(5) 0.0032(4) 0.0125(4) 0.0013(4)
O5 0.0342(5) 0.0303(5) 0.0292(5) 0.0067(4) 0.0054(4) -0.0055(4)
O6 0.0396(5) 0.0245(5) 0.0264(5) 0.0017(4) 0.0141(4) -0.0006(4)
O7 0.0284(5) 0.0263(5) 0.0266(5) 0.0015(4) 0.0128(4) 0.0007(4)
O8 0.0283(5) 0.0323(5) 0.0299(5) 0.0056(4) 0.0127(4) 0.0005(4)
C14 0.0305(7) 0.0291(7) 0.0498(9) 0.0024(6) 0.0184(6) -0.0070(6)
C15 0.0312(7) 0.0306(7) 0.0384(8) -0.0019(6) 0.0080(6) -0.0098(6)
C16 0.0373(7) 0.0240(6) 0.0281(7) 0.0026(5) 0.0151(6) 0.0010(5)
C17 0.0342(7) 0.0276(7) 0.0313(7) 0.0006(5) 0.0171(6) 0.0049(5)
C18 0.0292(7) 0.0324(7) 0.0219(6) 0.0023(5) 0.0072(5) 0.0032(5)
C19 0.0289(7) 0.0314(7) 0.0242(6) -0.0018(5) 0.0063(5) -0.0001(5)
C20 0.0383(7) 0.0257(6) 0.0330(7) 0.0034(5) 0.0215(6) 0.0020(5)
C21 0.0323(7) 0.0290(7) 0.0445(8) 0.0044(6) 0.0218(6) 0.0034(5)
C22 0.0281(7) 0.0343(7) 0.0345(7) 0.0112(6) 0.0092(6) 0.0041(5)
C23 0.0266(7) 0.0407(8) 0.0371(8) 0.0110(6) 0.0042(6) -0.0029(6)
C24 0.0485(9) 0.0301(7) 0.0212(6) 0.0013(5) 0.0060(6) -0.0079(6)
C25 0.0566(9) 0.0252(7) 0.0256(7) -0.0038(5) 0.0154(6) -0.0060(6)
C26 0.0375(7) 0.0284(7) 0.0329(7) 0.0017(5) 0.0206(6) 0.0007(5)
C27 0.0266(6) 0.0342(7) 0.0334(7) 0.0005(6) 0.0144(6) 0.0009(5)
C28 0.0310(7) 0.0226(6) 0.0291(6) -0.0002(5) 0.0124(5) -0.0026(5)
C29 0.0366(7) 0.0253(6) 0.0308(7) -0.0019(5) 0.0161(6) 0.0012(5)

_geom_special_details
;
 All esds (except the esd in the dihedral angle between two l.s. planes)
 are estimated using the full covariance matrix.  The cell esds are taken
 into account individually in the estimation of esds in distances, angles
 and torsion angles; correlations between esds in cell parameters are only
 used when they are defined by crystal symmetry.  An approximate (isotropic)
 treatment of cell esds is used for estimating esds involving l.s. planes.
;

loop_
 _geom_bond_atom_site_label_1
 _geom_bond_atom_site_label_2
 _geom_bond_distance
 _geom_bond_site_symmetry_2
 _geom_bond_publ_flag
P B 1.9688(15) . ?
P C1 1.8899(13) . ?
P C8 1.8400(14) . ?
B H1A 1.099(15) . ?
B H1B 1.147(16) . ?
B H1C 1.140(17) . ?
Si1 C1 1.8866(13) . ?
Si1 C2 1.8720(16) . ?
Si1 C3 1.8784(16) . ?
Si1 C4 1.8813(16) . ?
Si2 C1 1.8787(14) . ?
Si2 C5 1.8733(15) . ?
Si2 C6 1.8747(14) . ?
Si2 C7 1.8834(14) . ?
C1 H1 1.000 . ?
C2 H2A 0.980 . ?
C2 H2B 0.980 . ?
C2 H2C 0.980 . ?
C3 H3A 0.980 . ?
C3 H3B 0.980 . ?
C3 H3C 0.980 . ?
C4 H4A 0.980 . ?
C4 H4B 0.980 . ?
C4 H4C 0.980 . ?
C5 H5A 0.980 . ?
C5 H5B 0.980 . ?
C5 H5C 0.980 . ?
C6 H6A 0.980 . ?
C6 H6B 0.980 . ?
C6 H6C 0.980 . ?
C7 H7A 0.980 . ?
C7 H7B 0.980 . ?
C7 H7C 0.980 . ?
C8 C9 1.4033(19) . ?
C8 C13 1.3973(18) . ?
C9 H9 0.950 . ?
C9 C10 1.386(2) . ?
C10 H10 0.950 . ?
C10 C11 1.389(2) . ?
C11 H11 0.950 . ?
C11 C12 1.383(2) . ?
C12 H12 0.950 . ?
C12 C13 1.395(2) . ?
C13 H13 0.950 . ?
Na O1 2.4982(12) . ?
Na O2 2.5032(12) . ?
Na O3 2.4375(11) . ?
Na O4 2.4264(12) . ?
Na O5 2.3974(12) . ?
Na O6 2.4677(12) . ?
Na O7 2.4893(11) . ?
Na O8 2.5086(12) . ?
O1 C14 1.4269(17) . ?
O1 C21 1.4285(18) . ?
O2 C15 1.4291(18) . ?
O2 C16 1.4296(16) . ?
O3 C17 1.4315(16) . ?
O3 C18 1.4328(16) . ?
O4 C19 1.4308(16) . ?
O4 C20 1.4290(16) . ?
O5 C23 1.4290(19) . ?
O5 C24 1.4309(19) . ?
O6 C25 1.4322(17) . ?
O6 C26 1.4343(16) . ?
O7 C27 1.4304(16) . ?
O7 C28 1.4298(16) . ?
O8 C22 1.4309(17) . ?
O8 C29 1.4281(17) . ?
C14 H14A 0.990 . ?
C14 H14B 0.990 . ?
C14 C15 1.510(2) . ?
C15 H15A 0.990 . ?
C15 H15B 0.990 . ?
C16 H16A 0.990 . ?
C16 H16B 0.990 . ?
C16 C17 1.5015(19) . ?
C17 H17A 0.990 . ?
C17 H17B 0.990 . ?
C18 H18A 0.990 . ?
C18 H18B 0.990 . ?
C18 C19 1.5149(19) . ?
C19 H19A 0.990 . ?
C19 H19B 0.990 . ?
C20 H20A 0.990 . ?
C20 H20B 0.990 . ?
C20 C21 1.513(2) . ?
C21 H21A 0.990 . ?
C21 H21B 0.990 . ?
C22 H22A 0.990 . ?
C22 H22B 0.990 . ?
C22 C23 1.510(2) . ?
C23 H23A 0.990 . ?
C23 H23B 0.990 . ?
C24 H24A 0.990 . ?
C24 H24B 0.990 . ?
C24 C25 1.503(2) . ?
C25 H25A 0.990 . ?
C25 H25B 0.990 . ?
C26 H26A 0.990 . ?
C26 H26B 0.990 . ?
C26 C27 1.509(2) . ?
C27 H27A 0.990 . ?
C27 H27B 0.990 . ?
C28 H28A 0.990 . ?
C28 H28B 0.990 . ?
C28 C29 1.5089(19) . ?
C29 H29A 0.990 . ?
C29 H29B 0.990 . ?

loop_
 _geom_angle_atom_site_label_1
 _geom_angle_atom_site_label_2
 _geom_angle_atom_site_label_3
 _geom_angle
 _geom_angle_site_symmetry_1
 _geom_angle_site_symmetry_3
 _geom_angle_publ_flag
B P C1 110.57(6) . . ?
B P C8 106.06(7) . . ?
C1 P C8 101.50(6) . . ?
P B H1A 114.4(8) . . ?
P B H1B 104.0(8) . . ?
P B H1C 109.5(9) . . ?
H1A B H1B 108.2(11) . . ?
H1A B H1C 111.3(12) . . ?
H1B B H1C 109.1(12) . . ?
C1 Si1 C2 111.83(6) . . ?
C1 Si1 C3 108.70(7) . . ?
C1 Si1 C4 113.46(7) . . ?
C2 Si1 C3 108.33(8) . . ?
C2 Si1 C4 107.53(8) . . ?
C3 Si1 C4 106.76(8) . . ?
C1 Si2 C5 112.13(6) . . ?
C1 Si2 C6 112.46(6) . . ?
C1 Si2 C7 108.69(6) . . ?
C5 Si2 C6 109.51(7) . . ?
C5 Si2 C7 108.91(7) . . ?
C6 Si2 C7 104.83(7) . . ?
P C1 Si1 106.99(6) . . ?
P C1 Si2 117.10(6) . . ?
P C1 H1 103.9 . . ?
Si1 C1 Si2 118.99(7) . . ?
Si1 C1 H1 103.9 . . ?
Si2 C1 H1 103.9 . . ?
Si1 C2 H2A 109.5 . . ?
Si1 C2 H2B 109.5 . . ?
Si1 C2 H2C 109.5 . . ?
H2A C2 H2B 109.5 . . ?
H2A C2 H2C 109.5 . . ?
H2B C2 H2C 109.5 . . ?
Si1 C3 H3A 109.5 . . ?
Si1 C3 H3B 109.5 . . ?
Si1 C3 H3C 109.5 . . ?
H3A C3 H3B 109.5 . . ?
H3A C3 H3C 109.5 . . ?
H3B C3 H3C 109.5 . . ?
Si1 C4 H4A 109.5 . . ?
Si1 C4 H4B 109.5 . . ?
Si1 C4 H4C 109.5 . . ?
H4A C4 H4B 109.5 . . ?
H4A C4 H4C 109.5 . . ?
H4B C4 H4C 109.5 . . ?
Si2 C5 H5A 109.5 . . ?
Si2 C5 H5B 109.5 . . ?
Si2 C5 H5C 109.5 . . ?
H5A C5 H5B 109.5 . . ?
H5A C5 H5C 109.5 . . ?
H5B C5 H5C 109.5 . . ?
Si2 C6 H6A 109.5 . . ?
Si2 C6 H6B 109.5 . . ?
Si2 C6 H6C 109.5 . . ?
H6A C6 H6B 109.5 . . ?
H6A C6 H6C 109.5 . . ?
H6B C6 H6C 109.5 . . ?
Si2 C7 H7A 109.5 . . ?
Si2 C7 H7B 109.5 . . ?
Si2 C7 H7C 109.5 . . ?
H7A C7 H7B 109.5 . . ?
H7A C7 H7C 109.5 . . ?
H7B C7 H7C 109.5 . . ?
P C8 C9 120.18(10) . . ?
P C8 C13 122.34(10) . . ?
C9 C8 C13 117.13(12) . . ?
C8 C9 H9 119.1 . . ?
C8 C9 C10 121.72(13) . . ?
H9 C9 C10 119.1 . . ?
C9 C10 H10 119.9 . . ?
C9 C10 C11 120.20(14) . . ?
H10 C10 C11 119.9 . . ?
C10 C11 H11 120.4 . . ?
C10 C11 C12 119.12(14) . . ?
H11 C11 C12 120.4 . . ?
C11 C12 H12 119.7 . . ?
C11 C12 C13 120.67(14) . . ?
H12 C12 C13 119.7 . . ?
C8 C13 C12 121.15(14) . . ?
C8 C13 H13 119.4 . . ?
C12 C13 H13 119.4 . . ?
O1 Na O2 68.66(3) . . ?
O1 Na O3 107.40(4) . . ?
O1 Na O4 69.85(4) . . ?
O1 Na O5 82.49(4) . . ?
O1 Na O6 145.06(4) . . ?
O1 Na O7 143.04(4) . . ?
O1 Na O8 82.15(4) . . ?
O2 Na O3 68.93(4) . . ?
O2 Na O4 107.05(4) . . ?
O2 Na O5 83.19(4) . . ?
O2 Na O6 85.14(3) . . ?
O2 Na O7 146.59(4) . . ?
O2 Na O8 142.51(4) . . ?
O3 Na O4 70.15(3) . . ?
O3 Na O5 143.36(4) . . ?
O3 Na O6 82.60(4) . . ?
O3 Na O7 86.48(4) . . ?
O3 Na O8 145.33(4) . . ?
O4 Na O5 143.51(4) . . ?
O4 Na O6 142.72(4) . . ?
O4 Na O7 83.96(3) . . ?
O4 Na O8 82.99(3) . . ?
O5 Na O6 71.46(4) . . ?
O5 Na O7 106.89(4) . . ?
O5 Na O8 69.72(4) . . ?
O6 Na O7 69.03(4) . . ?
O6 Na O8 108.90(4) . . ?
O7 Na O8 68.78(4) . . ?
Na O1 C14 114.94(8) . . ?
Na O1 C21 107.85(8) . . ?
C14 O1 C21 113.84(11) . . ?
Na O2 C15 108.81(8) . . ?
Na O2 C16 113.41(8) . . ?
C15 O2 C16 114.16(10) . . ?
Na O3 C17 110.92(8) . . ?
Na O3 C18 115.51(7) . . ?
C17 O3 C18 113.52(10) . . ?
Na O4 C19 108.48(8) . . ?
Na O4 C20 114.92(8) . . ?
C19 O4 C20 114.14(10) . . ?
Na O5 C23 111.18(9) . . ?
Na O5 C24 113.51(9) . . ?
C23 O5 C24 113.73(11) . . ?
Na O6 C25 105.96(9) . . ?
Na O6 C26 114.93(8) . . ?
C25 O6 C26 113.61(10) . . ?
Na O7 C27 109.46(8) . . ?
Na O7 C28 114.50(8) . . ?
C27 O7 C28 113.15(10) . . ?
Na O8 C22 112.79(8) . . ?
Na O8 C29 108.97(8) . . ?
C22 O8 C29 113.81(10) . . ?
O1 C14 H14A 110.2 . . ?
O1 C14 H14B 110.2 . . ?
O1 C14 C15 107.53(12) . . ?
H14A C14 H14B 108.5 . . ?
H14A C14 C15 110.2 . . ?
H14B C14 C15 110.2 . . ?
O2 C15 C14 112.15(11) . . ?
O2 C15 H15A 109.2 . . ?
O2 C15 H15B 109.2 . . ?
C14 C15 H15A 109.2 . . ?
C14 C15 H15B 109.2 . . ?
H15A C15 H15B 107.9 . . ?
O2 C16 H16A 110.4 . . ?
O2 C16 H16B 110.4 . . ?
O2 C16 C17 106.64(11) . . ?
H16A C16 H16B 108.6 . . ?
H16A C16 C17 110.4 . . ?
H16B C16 C17 110.4 . . ?
O3 C17 C16 111.77(11) . . ?
O3 C17 H17A 109.3 . . ?
O3 C17 H17B 109.3 . . ?
C16 C17 H17A 109.3 . . ?
C16 C17 H17B 109.3 . . ?
H17A C17 H17B 107.9 . . ?
O3 C18 H18A 110.3 . . ?
O3 C18 H18B 110.3 . . ?
O3 C18 C19 106.97(10) . . ?
H18A C18 H18B 108.6 . . ?
H18A C18 C19 110.3 . . ?
H18B C18 C19 110.3 . . ?
O4 C19 C18 112.31(11) . . ?
O4 C19 H19A 109.1 . . ?
O4 C19 H19B 109.1 . . ?
C18 C19 H19A 109.1 . . ?
C18 C19 H19B 109.1 . . ?
H19A C19 H19B 107.9 . . ?
O4 C20 H20A 110.3 . . ?
O4 C20 H20B 110.3 . . ?
O4 C20 C21 106.94(11) . . ?
H20A C20 H20B 108.6 . . ?
H20A C20 C21 110.3 . . ?
H20B C20 C21 110.3 . . ?
O1 C21 C20 112.04(11) . . ?
O1 C21 H21A 109.2 . . ?
O1 C21 H21B 109.2 . . ?
C20 C21 H21A 109.2 . . ?
C20 C21 H21B 109.2 . . ?
H21A C21 H21B 107.9 . . ?
O8 C22 H22A 110.2 . . ?
O8 C22 H22B 110.2 . . ?
O8 C22 C23 107.47(11) . . ?
H22A C22 H22B 108.5 . . ?
H22A C22 C23 110.2 . . ?
H22B C22 C23 110.2 . . ?
O5 C23 C22 111.94(11) . . ?
O5 C23 H23A 109.2 . . ?
O5 C23 H23B 109.2 . . ?
C22 C23 H23A 109.2 . . ?
C22 C23 H23B 109.2 . . ?
H23A C23 H23B 107.9 . . ?
O5 C24 H24A 110.1 . . ?
O5 C24 H24B 110.1 . . ?
O5 C24 C25 107.84(11) . . ?
H24A C24 H24B 108.5 . . ?
H24A C24 C25 110.1 . . ?
H24B C24 C25 110.1 . . ?
O6 C25 C24 111.96(12) . . ?
O6 C25 H25A 109.2 . . ?
O6 C25 H25B 109.2 . . ?
C24 C25 H25A 109.2 . . ?
C24 C25 H25B 109.2 . . ?
H25A C25 H25B 107.9 . . ?
O6 C26 H26A 110.3 . . ?
O6 C26 H26B 110.3 . . ?
O6 C26 C27 107.09(11) . . ?
H26A C26 H26B 108.6 . . ?
H26A C26 C27 110.3 . . ?
H26B C26 C27 110.3 . . ?
O7 C27 C26 111.91(11) . . ?
O7 C27 H27A 109.2 . . ?
O7 C27 H27B 109.2 . . ?
C26 C27 H27A 109.2 . . ?
C26 C27 H27B 109.2 . . ?
H27A C27 H27B 107.9 . . ?
O7 C28 H28A 110.3 . . ?
O7 C28 H28B 110.3 . . ?
O7 C28 C29 106.96(10) . . ?
H28A C28 H28B 108.6 . . ?
H28A C28 C29 110.3 . . ?
H28B C28 C29 110.3 . . ?
O8 C29 C28 112.30(11) . . ?
O8 C29 H29A 109.1 . . ?
O8 C29 H29B 109.1 . . ?
C28 C29 H29A 109.1 . . ?
C28 C29 H29B 109.1 . . ?
H29A C29 H29B 107.9 . . ?

_diffrn_measured_fraction_theta_max    0.948
_diffrn_reflns_theta_full              25.00
_diffrn_measured_fraction_theta_full   0.992
_refine_diff_density_max    0.368
_refine_diff_density_min   -0.226
_refine_diff_density_rms    0.045

#===END

data_ki493_compound_15

_audit_creation_method            SHELXL-97
_chemical_name_systematic
;
 ?
;
_chemical_name_common             ?
_chemical_melting_point           ?
_chemical_formula_moiety          'C44 H100 B2 K2 N6 P2 Si4'
_chemical_formula_sum             'C44 H100 B2 K2 N6 P2 Si4'
_chemical_formula_weight          987.42

loop_
 _atom_type_symbol
 _atom_type_description
 _atom_type_scat_dispersion_real
 _atom_type_scat_dispersion_imag
 _atom_type_scat_source
 'C'  'C'   0.0033   0.0016
 'International Tables Vol C Tables 4.2.6.8 and 6.1.1.4'
 'H'  'H'   0.0000   0.0000
 'International Tables Vol C Tables 4.2.6.8 and 6.1.1.4'
 'N'  'N'   0.0061   0.0033
 'International Tables Vol C Tables 4.2.6.8 and 6.1.1.4'
 'K'  'K'   0.2009   0.2494
 'International Tables Vol C Tables 4.2.6.8 and 6.1.1.4'
 'Si'  'Si'   0.0817   0.0704
 'International Tables Vol C Tables 4.2.6.8 and 6.1.1.4'
 'P'  'P'   0.1023   0.0942
 'International Tables Vol C Tables 4.2.6.8 and 6.1.1.4'
 'B'  'B'   0.0013   0.0007
 'International Tables Vol C Tables 4.2.6.8 and 6.1.1.4'

_symmetry_cell_setting            triclinic
_symmetry_space_group_name_H-M    'P -1'

loop_
 _symmetry_equiv_pos_as_xyz
 'x, y, z'
 '-x, -y, -z'

_cell_length_a                    9.8704(7)
_cell_length_b                    13.1887(10)
_cell_length_c                    13.5125(10)
_cell_angle_alpha                 105.817(7)
_cell_angle_beta                  107.826(6)
_cell_angle_gamma                 100.218(7)
_cell_volume                      1544.5(2)
_cell_formula_units_Z             1
_cell_measurement_temperature     150(2)
_cell_measurement_reflns_used     7668
_cell_measurement_theta_min       3.08
_cell_measurement_theta_max       28.55

_exptl_crystal_description        block
_exptl_crystal_colour             yellow
_exptl_crystal_size_max           0.45
_exptl_crystal_size_mid           0.18
_exptl_crystal_size_min           0.14
_exptl_crystal_density_meas       ?
_exptl_crystal_density_diffrn     1.062
_exptl_crystal_density_method     'not measured'
_exptl_crystal_F_000              540
_exptl_absorpt_coefficient_mu     0.315
_exptl_absorpt_correction_type    multi-scan
_exptl_absorpt_correction_T_min   0.871
_exptl_absorpt_correction_T_max   0.957
_exptl_absorpt_process_details
;
CrysAlisPro, Oxford Diffraction Ltd.,
Version 1.171.34.44 (release 25-10-2010 CrysAlis171 .NET)
(compiled Oct 25 2010,18:11:34)
Empirical absorption correction using spherical harmonics,
 implemented in SCALE3 ABSPACK scaling algorithm.
;

_exptl_special_details
;
 ?
;

_diffrn_ambient_temperature       150(2)
_diffrn_radiation_wavelength      0.71073
_diffrn_radiation_type            MoK\a
_diffrn_radiation_source          'sealed tube with Enhance optics'
_diffrn_radiation_monochromator   none
_diffrn_measurement_device_type
'Oxford Diffraction Gemini A Ultra diffractometer'
_diffrn_measurement_method        '\w scans'
_diffrn_detector_area_resol_mean  10.3968
_diffrn_reflns_number             14729
_diffrn_reflns_av_R_equivalents   0.0489
_diffrn_reflns_av_sigmaI/netI     0.0512
_diffrn_reflns_limit_h_min        -11
_diffrn_reflns_limit_h_max        12
_diffrn_reflns_limit_k_min        -15
_diffrn_reflns_limit_k_max        16
_diffrn_reflns_limit_l_min        -16
_diffrn_reflns_limit_l_max        16
_diffrn_reflns_theta_min          3.08
_diffrn_reflns_theta_max          26.00
_reflns_number_total              5946
_reflns_number_gt                 4816
_reflns_threshold_expression      I>2\s(I)

_computing_data_collection
;
CrysAlisPro, Oxford Diffraction Ltd.,
Version 1.171.34.44 (release 25-10-2010 CrysAlis171 .NET)
(compiled Oct 25 2010,18:11:34)
;
_computing_cell_refinement
;
CrysAlisPro, Oxford Diffraction Ltd.,
Version 1.171.34.44 (release 25-10-2010 CrysAlis171 .NET)
(compiled Oct 25 2010,18:11:34)
;
_computing_data_reduction
;
CrysAlisPro, Oxford Diffraction Ltd.,
Version 1.171.34.44 (release 25-10-2010 CrysAlis171 .NET)
(compiled Oct 25 2010,18:11:34)
;
_computing_structure_solution     'Bruker SHELXTL'
_computing_structure_refinement   'Bruker SHELXTL'
_computing_molecular_graphics     'Bruker SHELXTL'
_computing_publication_material   'Bruker SHELXTL and local programs'

_refine_special_details
;
 Refinement of F^2^ against ALL reflections.  The weighted R-factor wR and
 goodness of fit S are based on F^2^, conventional R-factors R are based
 on F, with F set to zero for negative F^2^. The threshold expression of
 F^2^ > 2sigma(F^2^) is used only for calculating R-factors(gt) etc. and is
 not relevant to the choice of reflections for refinement.  R-factors based
 on F^2^ are statistically about twice as large as those based on F, and R-
 factors based on ALL data will be even larger.
;

_refine_ls_structure_factor_coef  Fsqd
_refine_ls_matrix_type            full
_refine_ls_weighting_scheme       calc
_refine_ls_weighting_details
 'calc w=1/[\s^2^(Fo^2^)+(0.0815P)^2^+0.3283P] where P=(Fo^2^+2Fc^2^)/3'
_atom_sites_solution_primary      direct
_atom_sites_solution_secondary    difmap
_atom_sites_solution_hydrogens    mixed
_refine_ls_hydrogen_treatment     mixed
_refine_ls_extinction_method      none
_refine_ls_extinction_coef        ?
_refine_ls_number_reflns          5946
_refine_ls_number_parameters      294
_refine_ls_number_restraints      0
_refine_ls_R_factor_all           0.0661
_refine_ls_R_factor_gt            0.0533
_refine_ls_wR_factor_ref          0.1498
_refine_ls_wR_factor_gt           0.1344
_refine_ls_goodness_of_fit_ref    1.071
_refine_ls_restrained_S_all       1.071
_refine_ls_shift/su_max           0.001
_refine_ls_shift/su_mean          0.000

loop_
 _atom_site_label
 _atom_site_type_symbol
 _atom_site_fract_x
 _atom_site_fract_y
 _atom_site_fract_z
 _atom_site_U_iso_or_equiv
 _atom_site_adp_type
 _atom_site_occupancy
 _atom_site_symmetry_multiplicity
 _atom_site_calc_flag
 _atom_site_refinement_flags
 _atom_site_disorder_assembly
 _atom_site_disorder_group
P P 0.68328(6) 0.72478(4) 0.76428(4) 0.02664(17) Uani 1 1 d . . .
B B 0.5440(3) 0.5758(2) 0.6915(2) 0.0348(6) Uani 1 1 d . . .
H1A H 0.468(3) 0.5750(19) 0.612(2) 0.033(6) Uiso 1 1 d . . .
H1B H 0.611(3) 0.522(2) 0.669(2) 0.053(8) Uiso 1 1 d . . .
H1C H 0.483(3) 0.544(2) 0.741(2) 0.061(9) Uiso 1 1 d . . .
Si1 Si 0.97803(7) 0.71312(6) 0.91428(5) 0.03678(19) Uani 1 1 d . . .
Si2 Si 0.70627(7) 0.70451(5) 1.00064(5) 0.03290(19) Uani 1 1 d . . .
C1 C 0.8007(2) 0.74776(18) 0.91110(17) 0.0285(5) Uani 1 1 d . . .
H1 H 0.8342 0.8297 0.9459 0.034 Uiso 1 1 calc R . .
C2 C 0.9460(3) 0.5702(2) 0.8225(2) 0.0568(8) Uani 1 1 d . . .
H2A H 1.0416 0.5554 0.8293 0.085 Uiso 1 1 calc R . .
H2B H 0.8914 0.5618 0.7453 0.085 Uiso 1 1 calc R . .
H2C H 0.8880 0.5182 0.8444 0.085 Uiso 1 1 calc R . .
C3 C 1.0836(3) 0.8117(3) 0.8694(2) 0.0564(8) Uani 1 1 d . . .
H3A H 1.1113 0.8863 0.9227 0.085 Uiso 1 1 calc R . .
H3B H 1.0215 0.8088 0.7959 0.085 Uiso 1 1 calc R . .
H3C H 1.1736 0.7918 0.8659 0.085 Uiso 1 1 calc R . .
C4 C 1.1007(3) 0.7288(3) 1.0571(2) 0.0527(7) Uani 1 1 d . . .
H4A H 1.1238 0.8045 1.1069 0.079 Uiso 1 1 calc R . .
H4B H 1.1930 0.7121 1.0552 0.079 Uiso 1 1 calc R . .
H4C H 1.0497 0.6780 1.0840 0.079 Uiso 1 1 calc R . .
C5 C 0.5149(3) 0.7191(2) 0.9683(2) 0.0434(6) Uani 1 1 d . . .
H5A H 0.4520 0.6710 0.8922 0.065 Uiso 1 1 calc R . .
H5B H 0.5179 0.7956 0.9759 0.065 Uiso 1 1 calc R . .
H5C H 0.4740 0.6984 1.0199 0.065 Uiso 1 1 calc R . .
C6 C 0.8167(3) 0.7991(2) 1.1481(2) 0.0485(7) Uani 1 1 d . . .
H6A H 0.7592 0.7900 1.1943 0.073 Uiso 1 1 calc R . .
H6B H 0.8384 0.8754 1.1506 0.073 Uiso 1 1 calc R . .
H6C H 0.9100 0.7811 1.1760 0.073 Uiso 1 1 calc R . .
C7 C 0.6987(3) 0.5608(2) 0.9942(2) 0.0495(7) Uani 1 1 d . . .
H7A H 0.6356 0.5099 0.9191 0.074 Uiso 1 1 calc R . .
H7B H 0.6573 0.5444 1.0473 0.074 Uiso 1 1 calc R . .
H7C H 0.7991 0.5522 1.0128 0.074 Uiso 1 1 calc R . .
C8 C 0.5735(2) 0.82191(18) 0.78152(17) 0.0284(5) Uani 1 1 d . . .
C9 C 0.4278(3) 0.7980(2) 0.7100(2) 0.0455(6) Uani 1 1 d . . .
H9 H 0.3804 0.7268 0.6552 0.055 Uiso 1 1 calc R . .
C10 C 0.3501(3) 0.8752(3) 0.7167(3) 0.0597(8) Uani 1 1 d . . .
H10 H 0.2503 0.8561 0.6667 0.072 Uiso 1 1 calc R . .
C11 C 0.4138(3) 0.9785(2) 0.7936(2) 0.0515(7) Uani 1 1 d . . .
H11 H 0.3593 1.0310 0.7975 0.062 Uiso 1 1 calc R . .
C12 C 0.5578(3) 1.0052(2) 0.8654(2) 0.0508(7) Uani 1 1 d . . .
H12 H 0.6036 1.0764 0.9204 0.061 Uiso 1 1 calc R . .
C13 C 0.6365(3) 0.9281(2) 0.8577(2) 0.0442(6) Uani 1 1 d . . .
H13 H 0.7372 0.9488 0.9065 0.053 Uiso 1 1 calc R . .
K K 0.62142(5) 0.64954(4) 0.49882(4) 0.03125(16) Uani 1 1 d . . .
N1 N 0.8805(2) 0.67595(17) 0.44827(17) 0.0401(5) Uani 1 1 d . . .
N2 N 0.7855(2) 0.87538(15) 0.54799(15) 0.0304(4) Uani 1 1 d . . .
N3 N 0.4682(2) 0.76467(16) 0.37957(16) 0.0334(4) Uani 1 1 d . . .
C14 C 0.8707(4) 0.6014(3) 0.3432(3) 0.0653(9) Uani 1 1 d . . .
H14A H 0.8089 0.6195 0.2821 0.098 Uiso 1 1 calc R . .
H14B H 0.8262 0.5256 0.3352 0.098 Uiso 1 1 calc R . .
H14C H 0.9704 0.6088 0.3414 0.098 Uiso 1 1 calc R . .
C15 C 0.9642(4) 0.6445(2) 0.5388(3) 0.0645(9) Uani 1 1 d . . .
H15A H 0.9163 0.5681 0.5268 0.097 Uiso 1 1 calc R . .
H15B H 0.9668 0.6927 0.6093 0.097 Uiso 1 1 calc R . .
H15C H 1.0658 0.6517 0.5412 0.097 Uiso 1 1 calc R . .
C16 C 0.9491(3) 0.7898(2) 0.4619(2) 0.0401(6) Uani 1 1 d . . .
H16A H 0.9012 0.8028 0.3924 0.048 Uiso 1 1 calc R . .
H16B H 1.0552 0.7991 0.4737 0.048 Uiso 1 1 calc R . .
C17 C 0.9379(3) 0.87553(19) 0.55707(19) 0.0354(5) Uani 1 1 d . . .
H17A H 0.9888 0.8639 0.6268 0.042 Uiso 1 1 calc R . .
H17B H 0.9916 0.9490 0.5625 0.042 Uiso 1 1 calc R . .
C18 C 0.7915(3) 0.94847(19) 0.6538(2) 0.0399(6) Uani 1 1 d . . .
H18A H 0.6903 0.9468 0.6502 0.060 Uiso 1 1 calc R . .
H18B H 0.8471 1.0237 0.6682 0.060 Uiso 1 1 calc R . .
H18C H 0.8409 0.9237 0.7138 0.060 Uiso 1 1 calc R . .
C19 C 0.7103(3) 0.91096(19) 0.4572(2) 0.0356(5) Uani 1 1 d . . .
H19A H 0.7323 0.8760 0.3914 0.043 Uiso 1 1 calc R . .
H19B H 0.7504 0.9916 0.4796 0.043 Uiso 1 1 calc R . .
C20 C 0.5430(3) 0.88191(19) 0.4257(2) 0.0364(5) Uani 1 1 d . . .
H20A H 0.5218 0.9147 0.4925 0.044 Uiso 1 1 calc R . .
H20B H 0.5007 0.9157 0.3707 0.044 Uiso 1 1 calc R . .
C21 C 0.3151(3) 0.7460(3) 0.3737(3) 0.0542(7) Uani 1 1 d . . .
H21A H 0.3147 0.7776 0.4482 0.081 Uiso 1 1 calc R . .
H21B H 0.2658 0.6668 0.3440 0.081 Uiso 1 1 calc R . .
H21C H 0.2622 0.7810 0.3250 0.081 Uiso 1 1 calc R . .
C22 C 0.4691(3) 0.7152(2) 0.2695(2) 0.0478(7) Uani 1 1 d . . .
H22A H 0.5709 0.7165 0.2752 0.072 Uiso 1 1 calc R . .
H22B H 0.4309 0.7568 0.2226 0.072 Uiso 1 1 calc R . .
H22C H 0.4061 0.6389 0.2364 0.072 Uiso 1 1 calc R . .

loop_
 _atom_site_aniso_label
 _atom_site_aniso_U_11
 _atom_site_aniso_U_22
 _atom_site_aniso_U_33
 _atom_site_aniso_U_23
 _atom_site_aniso_U_13
 _atom_site_aniso_U_12
P 0.0283(3) 0.0272(3) 0.0216(3) 0.0069(2) 0.0093(2) 0.0036(2)
B 0.0364(14) 0.0262(13) 0.0321(15) 0.0053(10) 0.0094(12) 0.0001(11)
Si1 0.0306(4) 0.0480(4) 0.0296(4) 0.0111(3) 0.0105(3) 0.0109(3)
Si2 0.0388(4) 0.0368(4) 0.0253(3) 0.0113(3) 0.0157(3) 0.0087(3)
C1 0.0288(11) 0.0316(11) 0.0221(11) 0.0070(9) 0.0098(9) 0.0047(9)
C2 0.0520(17) 0.0598(18) 0.0545(18) 0.0074(14) 0.0191(14) 0.0274(15)
C3 0.0353(14) 0.084(2) 0.0479(17) 0.0275(15) 0.0167(12) 0.0039(14)
C4 0.0388(15) 0.080(2) 0.0382(15) 0.0232(14) 0.0089(12) 0.0210(14)
C5 0.0436(14) 0.0571(16) 0.0393(14) 0.0198(12) 0.0252(12) 0.0153(13)
C6 0.0552(17) 0.0581(17) 0.0277(13) 0.0100(11) 0.0181(12) 0.0088(14)
C7 0.0597(17) 0.0423(15) 0.0513(17) 0.0207(12) 0.0258(14) 0.0096(13)
C8 0.0301(11) 0.0335(12) 0.0253(11) 0.0138(9) 0.0137(9) 0.0061(9)
C9 0.0378(14) 0.0405(14) 0.0464(15) 0.0094(11) 0.0064(11) 0.0091(11)
C10 0.0363(15) 0.0622(19) 0.068(2) 0.0194(16) 0.0047(14) 0.0171(14)
C11 0.0510(17) 0.0526(17) 0.0644(19) 0.0260(14) 0.0277(14) 0.0268(14)
C12 0.0574(17) 0.0390(14) 0.0493(16) 0.0063(12) 0.0175(13) 0.0166(13)
C13 0.0380(14) 0.0400(14) 0.0431(15) 0.0046(11) 0.0080(11) 0.0120(11)
K 0.0366(3) 0.0265(3) 0.0282(3) 0.0089(2) 0.0139(2) 0.0012(2)
N1 0.0393(11) 0.0411(12) 0.0388(12) 0.0099(9) 0.0170(9) 0.0108(9)
N2 0.0328(10) 0.0284(9) 0.0298(10) 0.0116(8) 0.0130(8) 0.0038(8)
N3 0.0304(10) 0.0347(10) 0.0338(11) 0.0095(8) 0.0131(8) 0.0081(8)
C14 0.0592(19) 0.064(2) 0.061(2) -0.0021(15) 0.0313(16) 0.0111(16)
C15 0.081(2) 0.0427(16) 0.065(2) 0.0193(14) 0.0186(17) 0.0206(16)
C16 0.0345(13) 0.0502(15) 0.0412(14) 0.0201(12) 0.0187(11) 0.0108(11)
C17 0.0308(12) 0.0351(12) 0.0369(13) 0.0159(10) 0.0096(10) 0.0018(10)
C18 0.0516(15) 0.0294(12) 0.0345(13) 0.0078(10) 0.0166(11) 0.0063(11)
C19 0.0374(13) 0.0324(12) 0.0389(13) 0.0183(10) 0.0138(10) 0.0058(10)
C20 0.0398(13) 0.0336(12) 0.0367(13) 0.0120(10) 0.0137(11) 0.0140(10)
C21 0.0338(14) 0.0632(18) 0.0605(18) 0.0166(15) 0.0190(13) 0.0072(13)
C22 0.0490(16) 0.0488(15) 0.0377(15) 0.0073(12) 0.0142(12) 0.0112(13)

_geom_special_details
;
 All esds (except the esd in the dihedral angle between two l.s. planes)
 are estimated using the full covariance matrix.  The cell esds are taken
 into account individually in the estimation of esds in distances, angles
 and torsion angles; correlations between esds in cell parameters are only
 used when they are defined by crystal symmetry.  An approximate (isotropic)
 treatment of cell esds is used for estimating esds involving l.s. planes.
;

loop_
 _geom_bond_atom_site_label_1
 _geom_bond_atom_site_label_2
 _geom_bond_distance
 _geom_bond_site_symmetry_2
 _geom_bond_publ_flag
P B 1.969(3) . ?
P C1 1.874(2) . ?
P C8 1.831(2) . ?
P K 3.2754(8) . ?
B H1A 1.10(2) . ?
B H1B 1.10(3) . ?
B H1C 1.14(3) . ?
Si1 C1 1.877(2) . ?
Si1 C2 1.861(3) . ?
Si1 C3 1.866(3) . ?
Si1 C4 1.870(3) . ?
Si2 C1 1.880(2) . ?
Si2 C5 1.862(3) . ?
Si2 C6 1.883(3) . ?
Si2 C7 1.861(3) . ?
C1 H1 1.000 . ?
C2 H2A 0.980 . ?
C2 H2B 0.980 . ?
C2 H2C 0.980 . ?
C3 H3A 0.980 . ?
C3 H3B 0.980 . ?
C3 H3C 0.980 . ?
C4 H4A 0.980 . ?
C4 H4B 0.980 . ?
C4 H4C 0.980 . ?
C5 H5A 0.980 . ?
C5 H5B 0.980 . ?
C5 H5C 0.980 . ?
C6 H6A 0.980 . ?
C6 H6B 0.980 . ?
C6 H6C 0.980 . ?
C7 H7A 0.980 . ?
C7 H7B 0.980 . ?
C7 H7C 0.980 . ?
C8 C9 1.387(3) . ?
C8 C13 1.386(3) . ?
C9 H9 0.950 . ?
C9 C10 1.380(4) . ?
C10 H10 0.950 . ?
C10 C11 1.361(4) . ?
C11 H11 0.950 . ?
C11 C12 1.370(4) . ?
C12 H12 0.950 . ?
C12 C13 1.385(4) . ?
C13 H13 0.950 . ?
K H1A 2.71(2) . ?
K H1A 2.76(2) 2_666 ?
K H1B 2.77(3) 2_666 ?
K N1 2.830(2) . ?
K N2 2.9132(18) . ?
K N3 2.801(2) . ?
N1 C14 1.454(3) . ?
N1 C15 1.460(4) . ?
N1 C16 1.469(3) . ?
N2 C17 1.472(3) . ?
N2 C18 1.468(3) . ?
N2 C19 1.469(3) . ?
N3 C20 1.453(3) . ?
N3 C21 1.461(3) . ?
N3 C22 1.456(3) . ?
C14 H14A 0.980 . ?
C14 H14B 0.980 . ?
C14 H14C 0.980 . ?
C15 H15A 0.980 . ?
C15 H15B 0.980 . ?
C15 H15C 0.980 . ?
C16 H16A 0.990 . ?
C16 H16B 0.990 . ?
C16 C17 1.511(4) . ?
C17 H17A 0.990 . ?
C17 H17B 0.990 . ?
C18 H18A 0.980 . ?
C18 H18B 0.980 . ?
C18 H18C 0.980 . ?
C19 H19A 0.990 . ?
C19 H19B 0.990 . ?
C19 C20 1.520(3) . ?
C20 H20A 0.990 . ?
C20 H20B 0.990 . ?
C21 H21A 0.980 . ?
C21 H21B 0.980 . ?
C21 H21C 0.980 . ?
C22 H22A 0.980 . ?
C22 H22B 0.980 . ?
C22 H22C 0.980 . ?

loop_
 _geom_angle_atom_site_label_1
 _geom_angle_atom_site_label_2
 _geom_angle_atom_site_label_3
 _geom_angle
 _geom_angle_site_symmetry_1
 _geom_angle_site_symmetry_3
 _geom_angle_publ_flag
B P C1 111.20(11) . . ?
B P C8 107.46(12) . . ?
B P K 72.11(9) . . ?
C1 P C8 102.57(10) . . ?
C1 P K 151.87(7) . . ?
C8 P K 102.79(7) . . ?
P B H1A 105.8(12) . . ?
P B H1B 105.2(15) . . ?
P B H1C 117.5(15) . . ?
H1A B H1B 105.4(19) . . ?
H1A B H1C 112(2) . . ?
H1B B H1C 110(2) . . ?
C1 Si1 C2 112.73(12) . . ?
C1 Si1 C3 108.41(13) . . ?
C1 Si1 C4 112.27(12) . . ?
C2 Si1 C3 109.18(15) . . ?
C2 Si1 C4 107.43(14) . . ?
C3 Si1 C4 106.62(14) . . ?
C1 Si2 C5 113.70(11) . . ?
C1 Si2 C6 107.46(11) . . ?
C1 Si2 C7 112.51(12) . . ?
C5 Si2 C6 105.99(13) . . ?
C5 Si2 C7 108.49(13) . . ?
C6 Si2 C7 108.35(13) . . ?
P C1 Si1 108.91(11) . . ?
P C1 Si2 118.12(12) . . ?
P C1 H1 102.7 . . ?
Si1 C1 Si2 118.72(12) . . ?
Si1 C1 H1 102.7 . . ?
Si2 C1 H1 102.7 . . ?
Si1 C2 H2A 109.5 . . ?
Si1 C2 H2B 109.5 . . ?
Si1 C2 H2C 109.5 . . ?
H2A C2 H2B 109.5 . . ?
H2A C2 H2C 109.5 . . ?
H2B C2 H2C 109.5 . . ?
Si1 C3 H3A 109.5 . . ?
Si1 C3 H3B 109.5 . . ?
Si1 C3 H3C 109.5 . . ?
H3A C3 H3B 109.5 . . ?
H3A C3 H3C 109.5 . . ?
H3B C3 H3C 109.5 . . ?
Si1 C4 H4A 109.5 . . ?
Si1 C4 H4B 109.5 . . ?
Si1 C4 H4C 109.5 . . ?
H4A C4 H4B 109.5 . . ?
H4A C4 H4C 109.5 . . ?
H4B C4 H4C 109.5 . . ?
Si2 C5 H5A 109.5 . . ?
Si2 C5 H5B 109.5 . . ?
Si2 C5 H5C 109.5 . . ?
H5A C5 H5B 109.5 . . ?
H5A C5 H5C 109.5 . . ?
H5B C5 H5C 109.5 . . ?
Si2 C6 H6A 109.5 . . ?
Si2 C6 H6B 109.5 . . ?
Si2 C6 H6C 109.5 . . ?
H6A C6 H6B 109.5 . . ?
H6A C6 H6C 109.5 . . ?
H6B C6 H6C 109.5 . . ?
Si2 C7 H7A 109.5 . . ?
Si2 C7 H7B 109.5 . . ?
Si2 C7 H7C 109.5 . . ?
H7A C7 H7B 109.5 . . ?
H7A C7 H7C 109.5 . . ?
H7B C7 H7C 109.5 . . ?
P C8 C9 121.70(18) . . ?
P C8 C13 121.79(18) . . ?
C9 C8 C13 116.1(2) . . ?
C8 C9 H9 119.3 . . ?
C8 C9 C10 121.5(2) . . ?
H9 C9 C10 119.3 . . ?
C9 C10 H10 119.4 . . ?
C9 C10 C11 121.3(3) . . ?
H10 C10 C11 119.4 . . ?
C10 C11 H11 120.6 . . ?
C10 C11 C12 118.8(3) . . ?
H11 C11 C12 120.6 . . ?
C11 C12 H12 120.1 . . ?
C11 C12 C13 119.9(3) . . ?
H12 C12 C13 120.1 . . ?
C8 C13 C12 122.4(2) . . ?
C8 C13 H13 118.8 . . ?
C12 C13 H13 118.8 . . ?
P K H1A 48.4(5) . . ?
P K H1A 115.1(5) . 2_666 ?
P K H1B 126.2(6) . 2_666 ?
P K N1 114.66(4) . . ?
P K N2 85.64(4) . . ?
P K N3 117.12(4) . . ?
H1A K H1A 78.1(8) . 2_666 ?
H1A K H1B 77.9(8) . 2_666 ?
H1A K H1B 36.9(8) 2_666 2_666 ?
H1A K N1 149.1(5) . . ?
H1A K N1 92.0(5) 2_666 . ?
H1A K N2 127.5(5) . . ?
H1A K N2 154.2(5) 2_666 . ?
H1A K N3 110.3(5) . . ?
H1A K N3 113.7(5) 2_666 . ?
H1B K N1 111.2(6) 2_666 . ?
H1B K N2 140.6(6) 2_666 . ?
H1B K N3 79.1(6) 2_666 . ?
N1 K N2 64.24(6) . . ?
N1 K N3 100.55(6) . . ?
N2 K N3 64.55(5) . . ?
K N1 C14 117.12(17) . . ?
K N1 C15 94.06(18) . . ?
K N1 C16 113.61(14) . . ?
C14 N1 C15 109.5(2) . . ?
C14 N1 C16 110.0(2) . . ?
C15 N1 C16 111.5(2) . . ?
K N2 C17 107.12(13) . . ?
K N2 C18 111.28(13) . . ?
K N2 C19 107.82(13) . . ?
C17 N2 C18 108.49(18) . . ?
C17 N2 C19 112.10(18) . . ?
C18 N2 C19 110.03(19) . . ?
K N3 C20 111.90(14) . . ?
K N3 C21 111.81(16) . . ?
K N3 C22 102.18(15) . . ?
C20 N3 C21 109.8(2) . . ?
C20 N3 C22 111.5(2) . . ?
C21 N3 C22 109.5(2) . . ?
N1 C14 H14A 109.5 . . ?
N1 C14 H14B 109.5 . . ?
N1 C14 H14C 109.5 . . ?
H14A C14 H14B 109.5 . . ?
H14A C14 H14C 109.5 . . ?
H14B C14 H14C 109.5 . . ?
N1 C15 H15A 109.5 . . ?
N1 C15 H15B 109.5 . . ?
N1 C15 H15C 109.5 . . ?
H15A C15 H15B 109.5 . . ?
H15A C15 H15C 109.5 . . ?
H15B C15 H15C 109.5 . . ?
N1 C16 H16A 108.7 . . ?
N1 C16 H16B 108.7 . . ?
N1 C16 C17 114.2(2) . . ?
H16A C16 H16B 107.6 . . ?
H16A C16 C17 108.7 . . ?
H16B C16 C17 108.7 . . ?
N2 C17 C16 114.85(19) . . ?
N2 C17 H17A 108.6 . . ?
N2 C17 H17B 108.6 . . ?
C16 C17 H17A 108.6 . . ?
C16 C17 H17B 108.6 . . ?
H17A C17 H17B 107.5 . . ?
N2 C18 H18A 109.5 . . ?
N2 C18 H18B 109.5 . . ?
N2 C18 H18C 109.5 . . ?
H18A C18 H18B 109.5 . . ?
H18A C18 H18C 109.5 . . ?
H18B C18 H18C 109.5 . . ?
N2 C19 H19A 109.0 . . ?
N2 C19 H19B 109.0 . . ?
N2 C19 C20 112.77(19) . . ?
H19A C19 H19B 107.8 . . ?
H19A C19 C20 109.0 . . ?
H19B C19 C20 109.0 . . ?
N3 C20 C19 114.53(19) . . ?
N3 C20 H20A 108.6 . . ?
N3 C20 H20B 108.6 . . ?
C19 C20 H20A 108.6 . . ?
C19 C20 H20B 108.6 . . ?
H20A C20 H20B 107.6 . . ?
N3 C21 H21A 109.5 . . ?
N3 C21 H21B 109.5 . . ?
N3 C21 H21C 109.5 . . ?
H21A C21 H21B 109.5 . . ?
H21A C21 H21C 109.5 . . ?
H21B C21 H21C 109.5 . . ?
N3 C22 H22A 109.5 . . ?
N3 C22 H22B 109.5 . . ?
N3 C22 H22C 109.5 . . ?
H22A C22 H22B 109.5 . . ?
H22A C22 H22C 109.5 . . ?
H22B C22 H22C 109.5 . . ?

_diffrn_measured_fraction_theta_max    0.980
_diffrn_reflns_theta_full              26.00
_diffrn_measured_fraction_theta_full   0.980
_refine_diff_density_max    0.640
_refine_diff_density_min   -0.454
_refine_diff_density_rms    0.072

#===END

data_ki462_compound_16b

_audit_creation_method            SHELXL-97
_chemical_name_systematic
;
 ?
;
_chemical_name_common             ?
_chemical_melting_point           ?
_chemical_formula_moiety          'C21 H46 B2 Li O4 P Si2'
_chemical_formula_sum             'C21 H46 B2 Li O4 P Si2'
_chemical_formula_weight          478.29

loop_
 _atom_type_symbol
 _atom_type_description
 _atom_type_scat_dispersion_real
 _atom_type_scat_dispersion_imag
 _atom_type_scat_source
 'C'  'C'   0.0181   0.0091
 'International Tables Vol C Tables 4.2.6.8 and 6.1.1.4'
 'H'  'H'   0.0000   0.0000
 'International Tables Vol C Tables 4.2.6.8 and 6.1.1.4'
 'Li'  'Li'   0.0008   0.0003
 'International Tables Vol C Tables 4.2.6.8 and 6.1.1.4'
 'B'  'B'   0.0090   0.0039
 'International Tables Vol C Tables 4.2.6.8 and 6.1.1.4'
 'O'  'O'   0.0492   0.0322
 'International Tables Vol C Tables 4.2.6.8 and 6.1.1.4'
 'Si'  'Si'   0.2541   0.3302
 'International Tables Vol C Tables 4.2.6.8 and 6.1.1.4'
 'P'  'P'   0.2955   0.4335
 'International Tables Vol C Tables 4.2.6.8 and 6.1.1.4'

_symmetry_cell_setting            monoclinic
_symmetry_space_group_name_H-M    'P 21/c'

loop_
 _symmetry_equiv_pos_as_xyz
 'x, y, z'
 '-x, y+1/2, -z+1/2'
 '-x, -y, -z'
 'x, -y-1/2, z-1/2'

_cell_length_a                    15.0280(3)
_cell_length_b                    12.7789(3)
_cell_length_c                    14.9822(3)
_cell_angle_alpha                 90.00
_cell_angle_beta                  92.8258(17)
_cell_angle_gamma                 90.00
_cell_volume                      2873.70(11)
_cell_formula_units_Z             4
_cell_measurement_temperature     150(2)
_cell_measurement_reflns_used     6185
_cell_measurement_theta_min       2.94
_cell_measurement_theta_max       62.22

_exptl_crystal_description        block
_exptl_crystal_colour             colourless
_exptl_crystal_size_max           0.43
_exptl_crystal_size_mid           0.30
_exptl_crystal_size_min           0.30
_exptl_crystal_density_meas       ?
_exptl_crystal_density_diffrn     1.105
_exptl_crystal_density_method     'not measured'
_exptl_crystal_F_000              1040
_exptl_absorpt_coefficient_mu     1.815
_exptl_absorpt_correction_type    multi-scan
_exptl_absorpt_correction_T_min   0.509
_exptl_absorpt_correction_T_max   0.612
_exptl_absorpt_process_details
;
CrysAlisPro, Oxford Diffraction Ltd.,
Version 1.171.33.66 (release 28-04-2010 CrysAlis171 .NET)
(compiled Apr 28 2010,14:27:37)
Empirical absorption correction using spherical harmonics,
 implemented in SCALE3 ABSPACK scaling algorithm.
;

_exptl_special_details
;
 ?
;

_diffrn_ambient_temperature       150(2)
_diffrn_radiation_wavelength      1.54184
_diffrn_radiation_type            CuK\a
_diffrn_radiation_source          'sealed tube with Enhance Ultra optics'
_diffrn_radiation_monochromator   none
_diffrn_measurement_device_type
'Oxford Diffraction Gemini A Ultra diffractometer'
_diffrn_measurement_method        '\w scans'
_diffrn_detector_area_resol_mean  10.3968
_diffrn_reflns_number             8707
_diffrn_reflns_av_R_equivalents   0.0254
_diffrn_reflns_av_sigmaI/netI     0.0246
_diffrn_reflns_limit_h_min        -17
_diffrn_reflns_limit_h_max        11
_diffrn_reflns_limit_k_min        -14
_diffrn_reflns_limit_k_max        14
_diffrn_reflns_limit_l_min        -13
_diffrn_reflns_limit_l_max        17
_diffrn_reflns_theta_min          2.94
_diffrn_reflns_theta_max          62.31
_reflns_number_total              4451
_reflns_number_gt                 3928
_reflns_threshold_expression      I>2\s(I)

_computing_data_collection
;
CrysAlisPro, Oxford Diffraction Ltd.,
Version 1.171.33.66 (release 28-04-2010 CrysAlis171 .NET)
(compiled Apr 28 2010,14:27:37)
;
_computing_cell_refinement
;
CrysAlisPro, Oxford Diffraction Ltd.,
Version 1.171.33.66 (release 28-04-2010 CrysAlis171 .NET)
(compiled Apr 28 2010,14:27:37)
;
_computing_data_reduction
;
CrysAlisPro, Oxford Diffraction Ltd.,
Version 1.171.33.66 (release 28-04-2010 CrysAlis171 .NET)
(compiled Apr 28 2010,14:27:37)
;
_computing_structure_solution     'Bruker SHELXTL'
_computing_structure_refinement   'Bruker SHELXTL'
_computing_molecular_graphics     'Bruker SHELXTL'
_computing_publication_material   'Bruker SHELXTL and local programs'

_refine_special_details
;
 Refinement of F^2^ against ALL reflections.  The weighted R-factor wR and
 goodness of fit S are based on F^2^, conventional R-factors R are based
 on F, with F set to zero for negative F^2^. The threshold expression of
 F^2^ > 2sigma(F^2^) is used only for calculating R-factors(gt) etc. and is
 not relevant to the choice of reflections for refinement.  R-factors based
 on F^2^ are statistically about twice as large as those based on F, and R-
 factors based on ALL data will be even larger.

The crown ligand is disordered, and was refined as two components, with
the aid of restraints on geometry and displacement parameters.
;

_refine_ls_structure_factor_coef  Fsqd
_refine_ls_matrix_type            full
_refine_ls_weighting_scheme       calc
_refine_ls_weighting_details
 'calc w=1/[\s^2^(Fo^2^)+(0.1159P)^2^+4.3939P] where P=(Fo^2^+2Fc^2^)/3'
_atom_sites_solution_primary      direct
_atom_sites_solution_secondary    difmap
_atom_sites_solution_hydrogens    mixed
_refine_ls_hydrogen_treatment     mixed
_refine_ls_extinction_method      none
_refine_ls_extinction_coef        ?
_refine_ls_number_reflns          4451
_refine_ls_number_parameters      413
_refine_ls_number_restraints      513
_refine_ls_R_factor_all           0.0739
_refine_ls_R_factor_gt            0.0679
_refine_ls_wR_factor_ref          0.1958
_refine_ls_wR_factor_gt           0.1893
_refine_ls_goodness_of_fit_ref    1.066
_refine_ls_restrained_S_all       1.188
_refine_ls_shift/su_max           0.000
_refine_ls_shift/su_mean          0.000

loop_
 _atom_site_label
 _atom_site_type_symbol
 _atom_site_fract_x
 _atom_site_fract_y
 _atom_site_fract_z
 _atom_site_U_iso_or_equiv
 _atom_site_adp_type
 _atom_site_occupancy
 _atom_site_symmetry_multiplicity
 _atom_site_calc_flag
 _atom_site_refinement_flags
 _atom_site_disorder_assembly
 _atom_site_disorder_group
P P 0.28408(6) 0.58855(7) 0.23064(6) 0.0260(3) Uani 1 1 d . . .
B1 B 0.3031(3) 0.5062(4) 0.3378(3) 0.0382(10) Uani 1 1 d . A .
H1A H 0.271(3) 0.436(4) 0.330(3) 0.045(12) Uiso 1 1 d . . .
H1B H 0.375(3) 0.489(4) 0.343(3) 0.055(13) Uiso 1 1 d . . .
H1C H 0.283(3) 0.548(4) 0.396(3) 0.054(13) Uiso 1 1 d . . .
B2 B 0.3284(3) 0.5160(4) 0.1275(3) 0.0418(11) Uani 1 1 d . . .
H2A H 0.321(5) 0.437(6) 0.136(5) 0.11(2) Uiso 1 1 d . . .
H2B H 0.399(5) 0.529(5) 0.114(4) 0.10(2) Uiso 1 1 d . . .
H2C H 0.292(4) 0.545(5) 0.061(4) 0.10(2) Uiso 1 1 d . . .
Si1 Si 0.15146(7) 0.70545(8) 0.09696(6) 0.0335(3) Uani 1 1 d . . .
Si2 Si 0.07935(7) 0.54239(8) 0.24192(7) 0.0334(3) Uani 1 1 d . . .
C1 C 0.1687(2) 0.6366(3) 0.2085(2) 0.0255(7) Uani 1 1 d . . .
H1 H 0.1640 0.6949 0.2526 0.031 Uiso 1 1 calc R . .
C2 C 0.0670(4) 0.8109(4) 0.1121(3) 0.0659(15) Uani 1 1 d . . .
H2D H 0.0562 0.8485 0.0556 0.099 Uiso 1 1 calc R . .
H2E H 0.0895 0.8598 0.1583 0.099 Uiso 1 1 calc R . .
H2F H 0.0113 0.7795 0.1304 0.099 Uiso 1 1 calc R . .
C3 C 0.1117(3) 0.6167(4) 0.0044(3) 0.0509(11) Uani 1 1 d . . .
H3A H 0.1044 0.6567 -0.0513 0.076 Uiso 1 1 calc R . .
H3B H 0.0544 0.5859 0.0187 0.076 Uiso 1 1 calc R . .
H3C H 0.1555 0.5608 -0.0029 0.076 Uiso 1 1 calc R . .
C4 C 0.2523(3) 0.7752(4) 0.0618(3) 0.0535(12) Uani 1 1 d . . .
H4A H 0.2394 0.8088 0.0038 0.080 Uiso 1 1 calc R . .
H4B H 0.3011 0.7251 0.0567 0.080 Uiso 1 1 calc R . .
H4C H 0.2695 0.8286 0.1064 0.080 Uiso 1 1 calc R . .
C5 C -0.0342(3) 0.5832(4) 0.1976(3) 0.0522(12) Uani 1 1 d . . .
H5A H -0.0784 0.5323 0.2162 0.078 Uiso 1 1 calc R . .
H5B H -0.0351 0.5862 0.1322 0.078 Uiso 1 1 calc R . .
H5C H -0.0483 0.6524 0.2213 0.078 Uiso 1 1 calc R . .
C6 C 0.0735(3) 0.5472(4) 0.3664(3) 0.0475(11) Uani 1 1 d . . .
H6A H 0.0277 0.4984 0.3852 0.071 Uiso 1 1 calc R . .
H6B H 0.0583 0.6183 0.3848 0.071 Uiso 1 1 calc R . .
H6C H 0.1314 0.5273 0.3944 0.071 Uiso 1 1 calc R . .
C7 C 0.0987(3) 0.4074(3) 0.1993(3) 0.0492(11) Uani 1 1 d . . .
H7A H 0.0512 0.3610 0.2181 0.074 Uiso 1 1 calc R . .
H7B H 0.1563 0.3816 0.2235 0.074 Uiso 1 1 calc R . .
H7C H 0.0986 0.4087 0.1339 0.074 Uiso 1 1 calc R . .
C8 C 0.3446(2) 0.7094(3) 0.2589(2) 0.0300(8) Uani 1 1 d . . .
C9 C 0.4247(3) 0.7354(4) 0.2218(3) 0.0416(10) Uani 1 1 d . . .
H9 H 0.4478 0.6916 0.1773 0.050 Uiso 1 1 calc R . .
C10 C 0.4714(3) 0.8247(4) 0.2492(3) 0.0509(12) Uani 1 1 d . . .
H10 H 0.5261 0.8413 0.2232 0.061 Uiso 1 1 calc R . .
C11 C 0.4392(3) 0.8888(4) 0.3133(3) 0.0505(12) Uani 1 1 d . . .
H11 H 0.4713 0.9498 0.3315 0.061 Uiso 1 1 calc R . .
C12 C 0.3601(3) 0.8645(3) 0.3513(3) 0.0455(10) Uani 1 1 d . . .
H12 H 0.3375 0.9088 0.3958 0.055 Uiso 1 1 calc R . .
C13 C 0.3139(3) 0.7755(3) 0.3246(2) 0.0349(9) Uani 1 1 d . . .
H13 H 0.2599 0.7590 0.3518 0.042 Uiso 1 1 calc R . .
Li Li 0.3194(4) 0.3875(5) 0.4511(4) 0.0376(14) Uani 1 1 d . . .
O1 O 0.2186(3) 0.2676(4) 0.4371(3) 0.0676(12) Uani 0.767(3) 1 d PDU A 1
C14 C 0.2650(7) 0.1742(8) 0.4201(9) 0.105(2) Uani 0.767(3) 1 d PDU A 1
H14A H 0.2579 0.1291 0.4729 0.125 Uiso 0.767(3) 1 calc PR A 1
H14B H 0.2313 0.1398 0.3698 0.125 Uiso 0.767(3) 1 calc PR A 1
C15 C 0.3441(6) 0.1679(6) 0.4028(7) 0.081(2) Uani 0.767(3) 1 d PDU A 1
H15A H 0.3477 0.1556 0.3378 0.098 Uiso 0.767(3) 1 calc PR A 1
H15B H 0.3703 0.1061 0.4341 0.098 Uiso 0.767(3) 1 calc PR A 1
O2 O 0.3963(3) 0.2570(3) 0.4266(3) 0.0492(10) Uani 0.767(3) 1 d PDU A 1
C16 C 0.4609(5) 0.2378(6) 0.4975(4) 0.0572(15) Uani 0.767(3) 1 d PDU A 1
H16A H 0.5086 0.1913 0.4773 0.069 Uiso 0.767(3) 1 calc PR A 1
H16B H 0.4329 0.2047 0.5488 0.069 Uiso 0.767(3) 1 calc PR A 1
C17 C 0.4968(4) 0.3406(6) 0.5222(5) 0.0563(16) Uani 0.767(3) 1 d PDU A 1
H17A H 0.5394 0.3336 0.5744 0.068 Uiso 0.767(3) 1 calc PR A 1
H17B H 0.5293 0.3697 0.4719 0.068 Uiso 0.767(3) 1 calc PR A 1
O3 O 0.4261(3) 0.4104(3) 0.5437(3) 0.0507(10) Uani 0.767(3) 1 d PDU A 1
C18 C 0.4000(5) 0.4023(7) 0.6336(4) 0.0719(17) Uani 0.767(3) 1 d PDU A 1
H18A H 0.3983 0.3279 0.6519 0.086 Uiso 0.767(3) 1 calc PR A 1
H18B H 0.4433 0.4395 0.6742 0.086 Uiso 0.767(3) 1 calc PR A 1
C19 C 0.3146(6) 0.4477(8) 0.6382(5) 0.088(2) Uani 0.767(3) 1 d PDU A 1
H19A H 0.3198 0.5245 0.6316 0.106 Uiso 0.767(3) 1 calc PR A 1
H19B H 0.2918 0.4335 0.6979 0.106 Uiso 0.767(3) 1 calc PR A 1
O4 O 0.2516(3) 0.4091(4) 0.5712(3) 0.0683(12) Uani 0.767(3) 1 d PDU A 1
C20 C 0.1866(7) 0.3307(8) 0.5791(7) 0.102(2) Uani 0.767(3) 1 d PDU A 1
H20A H 0.2099 0.2784 0.6231 0.122 Uiso 0.767(3) 1 calc PR A 1
H20B H 0.1333 0.3630 0.6040 0.122 Uiso 0.767(3) 1 calc PR A 1
C21 C 0.1610(6) 0.2807(9) 0.5050(7) 0.103(2) Uani 0.767(3) 1 d PDU A 1
H21A H 0.1078 0.3174 0.4792 0.123 Uiso 0.767(3) 1 calc PR A 1
H21B H 0.1413 0.2100 0.5227 0.123 Uiso 0.767(3) 1 calc PR A 1
O1A O 0.2932(8) 0.2213(10) 0.4020(9) 0.073(2) Uani 0.233(3) 1 d PDU A 2
C14A C 0.3721(11) 0.1581(13) 0.4257(17) 0.073(3) Uani 0.233(3) 1 d PDU A 2
H14C H 0.3518 0.0908 0.4504 0.087 Uiso 0.233(3) 1 calc PR A 2
H14D H 0.4022 0.1419 0.3700 0.087 Uiso 0.233(3) 1 calc PR A 2
C15A C 0.4304(13) 0.1973(10) 0.4817(14) 0.058(3) Uani 0.233(3) 1 d PDU A 2
H15C H 0.4868 0.1580 0.4774 0.069 Uiso 0.233(3) 1 calc PR A 2
H15D H 0.4097 0.1869 0.5428 0.069 Uiso 0.233(3) 1 calc PR A 2
O2A O 0.4486(8) 0.3077(9) 0.4695(8) 0.057(2) Uani 0.233(3) 1 d PDU A 2
C16A C 0.4893(11) 0.3371(18) 0.5557(12) 0.060(3) Uani 0.233(3) 1 d PDU A 2
H16C H 0.5067 0.2718 0.5876 0.072 Uiso 0.233(3) 1 calc PR A 2
H16D H 0.5449 0.3755 0.5447 0.072 Uiso 0.233(3) 1 calc PR A 2
C17A C 0.4439(10) 0.3933(19) 0.6093(10) 0.068(3) Uani 0.233(3) 1 d PDU A 2
H17C H 0.4818 0.4531 0.6291 0.082 Uiso 0.233(3) 1 calc PR A 2
H17D H 0.4337 0.3504 0.6628 0.082 Uiso 0.233(3) 1 calc PR A 2
O3A O 0.3581(8) 0.4351(10) 0.5771(8) 0.068(2) Uani 0.233(3) 1 d PDU A 2
C18A C 0.3048(11) 0.371(2) 0.6368(10) 0.069(3) Uani 0.233(3) 1 d PDU A 2
H18C H 0.3326 0.3010 0.6430 0.083 Uiso 0.233(3) 1 calc PR A 2
H18D H 0.3071 0.4038 0.6967 0.083 Uiso 0.233(3) 1 calc PR A 2
C19A C 0.2223(11) 0.359(2) 0.6103(10) 0.075(3) Uani 0.233(3) 1 d PDU A 2
H19C H 0.1886 0.4204 0.6308 0.090 Uiso 0.233(3) 1 calc PR A 2
H19D H 0.1989 0.2967 0.6406 0.090 Uiso 0.233(3) 1 calc PR A 2
O4A O 0.2031(9) 0.3471(10) 0.5138(9) 0.082(2) Uani 0.233(3) 1 d PDU A 2
C20A C 0.1861(15) 0.2336(12) 0.5124(15) 0.076(3) Uani 0.233(3) 1 d PDU A 2
H20C H 0.1935 0.2080 0.5747 0.091 Uiso 0.233(3) 1 calc PR A 2
H20D H 0.1227 0.2231 0.4931 0.091 Uiso 0.233(3) 1 calc PR A 2
C21A C 0.2325(12) 0.1754(11) 0.4643(14) 0.066(3) Uani 0.233(3) 1 d PDU A 2
H21C H 0.1908 0.1297 0.4292 0.079 Uiso 0.233(3) 1 calc PR A 2
H21D H 0.2684 0.1293 0.5052 0.079 Uiso 0.233(3) 1 calc PR A 2

loop_
 _atom_site_aniso_label
 _atom_site_aniso_U_11
 _atom_site_aniso_U_22
 _atom_site_aniso_U_33
 _atom_site_aniso_U_23
 _atom_site_aniso_U_13
 _atom_site_aniso_U_12
P 0.0309(5) 0.0222(5) 0.0245(5) 0.0012(3) -0.0029(4) 0.0025(3)
B1 0.055(3) 0.025(2) 0.034(2) 0.0083(18) -0.012(2) -0.002(2)
B2 0.045(3) 0.043(3) 0.037(2) -0.009(2) 0.001(2) 0.016(2)
Si1 0.0409(6) 0.0324(6) 0.0268(5) 0.0028(4) -0.0028(4) 0.0109(4)
Si2 0.0349(6) 0.0308(6) 0.0345(6) -0.0046(4) 0.0006(4) -0.0055(4)
C1 0.0314(18) 0.0194(17) 0.0253(17) -0.0004(13) -0.0017(14) 0.0009(14)
C2 0.089(4) 0.058(3) 0.052(3) 0.017(2) 0.011(3) 0.043(3)
C3 0.054(3) 0.065(3) 0.032(2) -0.007(2) -0.0090(19) 0.001(2)
C4 0.072(3) 0.052(3) 0.035(2) 0.015(2) -0.004(2) -0.013(2)
C5 0.031(2) 0.063(3) 0.063(3) -0.004(2) 0.002(2) -0.006(2)
C6 0.055(3) 0.051(3) 0.037(2) 0.0002(19) 0.0104(19) -0.020(2)
C7 0.055(3) 0.036(2) 0.057(3) -0.011(2) 0.000(2) -0.0092(19)
C8 0.0347(19) 0.0282(19) 0.0263(18) 0.0064(14) -0.0061(14) 0.0002(15)
C9 0.038(2) 0.051(3) 0.036(2) 0.0064(19) 0.0004(17) -0.0060(19)
C10 0.040(2) 0.058(3) 0.054(3) 0.022(2) -0.008(2) -0.019(2)
C11 0.061(3) 0.035(2) 0.054(3) 0.011(2) -0.021(2) -0.017(2)
C12 0.060(3) 0.031(2) 0.044(2) -0.0024(18) -0.014(2) -0.0047(19)
C13 0.041(2) 0.031(2) 0.0328(19) 0.0035(16) -0.0036(16) -0.0030(16)
Li 0.039(3) 0.035(3) 0.038(3) 0.009(3) -0.006(3) -0.002(3)
O1 0.061(2) 0.057(2) 0.083(3) 0.037(2) -0.014(2) -0.024(2)
C14 0.104(4) 0.068(4) 0.139(5) 0.007(4) -0.019(4) -0.028(4)
C15 0.099(4) 0.045(3) 0.098(5) -0.012(3) -0.018(4) -0.005(3)
O2 0.067(2) 0.0324(19) 0.047(2) 0.0025(16) -0.0143(18) 0.0077(17)
C16 0.063(3) 0.060(3) 0.047(3) 0.005(3) -0.007(3) 0.022(3)
C17 0.045(3) 0.071(3) 0.051(3) 0.013(3) -0.017(3) 0.000(3)
O3 0.058(2) 0.050(2) 0.041(2) -0.0026(17) -0.0169(17) -0.0041(18)
C18 0.088(4) 0.085(4) 0.042(3) -0.004(3) -0.008(3) -0.009(4)
C19 0.126(5) 0.085(4) 0.054(3) 0.003(4) 0.010(3) 0.023(4)
O4 0.071(3) 0.078(3) 0.057(2) 0.030(2) 0.017(2) 0.020(2)
C20 0.110(5) 0.093(5) 0.106(4) 0.026(4) 0.050(4) -0.012(4)
C21 0.078(4) 0.111(5) 0.118(5) 0.052(4) -0.007(4) -0.035(4)
O1A 0.078(5) 0.049(5) 0.090(5) 0.032(4) -0.004(4) -0.014(4)
C14A 0.081(5) 0.046(5) 0.088(6) 0.011(5) -0.016(5) -0.004(5)
C15A 0.071(6) 0.044(5) 0.057(6) 0.005(5) -0.004(5) 0.007(5)
O2A 0.072(5) 0.047(5) 0.050(5) 0.007(4) -0.009(4) 0.003(4)
C16A 0.066(5) 0.062(5) 0.050(5) 0.003(5) -0.019(5) 0.002(5)
C17A 0.075(5) 0.072(5) 0.057(5) 0.002(5) -0.011(5) -0.001(5)
O3A 0.082(4) 0.069(5) 0.053(4) 0.014(4) 0.004(4) 0.006(4)
C18A 0.090(5) 0.071(5) 0.047(5) 0.015(5) 0.008(5) 0.004(5)
C19A 0.079(6) 0.080(6) 0.068(6) 0.025(5) 0.010(5) 0.006(6)
O4A 0.081(5) 0.079(5) 0.085(5) 0.040(4) 0.001(4) -0.010(4)
C20A 0.073(5) 0.067(5) 0.087(5) 0.046(5) 0.002(5) -0.024(5)
C21A 0.071(6) 0.046(5) 0.079(6) 0.052(5) -0.010(5) -0.030(5)

_geom_special_details
;
 All esds (except the esd in the dihedral angle between two l.s. planes)
 are estimated using the full covariance matrix.  The cell esds are taken
 into account individually in the estimation of esds in distances, angles
 and torsion angles; correlations between esds in cell parameters are only
 used when they are defined by crystal symmetry.  An approximate (isotropic)
 treatment of cell esds is used for estimating esds involving l.s. planes.
;

loop_
 _geom_bond_atom_site_label_1
 _geom_bond_atom_site_label_2
 _geom_bond_distance
 _geom_bond_site_symmetry_2
 _geom_bond_publ_flag
P B1 1.929(4) . ?
P B2 1.948(5) . ?
P C1 1.854(3) . ?
P C8 1.832(4) . ?
B1 H1A 1.02(5) . ?
B1 H1B 1.10(5) . ?
B1 H1C 1.08(5) . ?
B2 H2A 1.02(8) . ?
B2 H2B 1.11(7) . ?
B2 H2C 1.17(7) . ?
Si1 C1 1.895(3) . ?
Si1 C2 1.872(5) . ?
Si1 C3 1.867(4) . ?
Si1 C4 1.857(5) . ?
Si2 C1 1.890(3) . ?
Si2 C5 1.873(4) . ?
Si2 C6 1.872(4) . ?
Si2 C7 1.867(4) . ?
C1 H1 1.000 . ?
C2 H2D 0.980 . ?
C2 H2E 0.980 . ?
C2 H2F 0.980 . ?
C3 H3A 0.980 . ?
C3 H3B 0.980 . ?
C3 H3C 0.980 . ?
C4 H4A 0.980 . ?
C4 H4B 0.980 . ?
C4 H4C 0.980 . ?
C5 H5A 0.980 . ?
C5 H5B 0.980 . ?
C5 H5C 0.980 . ?
C6 H6A 0.980 . ?
C6 H6B 0.980 . ?
C6 H6C 0.980 . ?
C7 H7A 0.980 . ?
C7 H7B 0.980 . ?
C7 H7C 0.980 . ?
C8 C9 1.389(5) . ?
C8 C13 1.394(5) . ?
C9 H9 0.950 . ?
C9 C10 1.392(6) . ?
C10 H10 0.950 . ?
C10 C11 1.368(7) . ?
C11 H11 0.950 . ?
C11 C12 1.379(7) . ?
C12 H12 0.950 . ?
C12 C13 1.381(6) . ?
C13 H13 0.950 . ?
Li H1A 2.01(4) . ?
Li H1B 2.28(5) . ?
Li H1C 2.27(5) . ?
Li O1 2.157(8) . ?
Li O2 2.072(8) . ?
Li O3 2.090(7) . ?
Li O4 2.129(8) . ?
Li O1A 2.275(15) . ?
Li O2A 2.199(14) . ?
Li O3A 2.041(14) . ?
Li O4A 2.089(15) . ?
O1 C14 1.413(11) . ?
O1 C21 1.377(11) . ?
C14 H14A 0.990 . ?
C14 H14B 0.990 . ?
C14 C15 1.231(13) . ?
C15 H15A 0.990 . ?
C15 H15B 0.990 . ?
C15 O2 1.419(8) . ?
O2 C16 1.424(7) . ?
C16 H16A 0.990 . ?
C16 H16B 0.990 . ?
C16 C17 1.461(11) . ?
C17 H17A 0.990 . ?
C17 H17B 0.990 . ?
C17 O3 1.435(8) . ?
O3 C18 1.424(8) . ?
C18 H18A 0.990 . ?
C18 H18B 0.990 . ?
C18 C19 1.414(11) . ?
C19 H19A 0.990 . ?
C19 H19B 0.990 . ?
C19 O4 1.433(10) . ?
O4 C20 1.410(10) . ?
C20 H20A 0.990 . ?
C20 H20B 0.990 . ?
C20 C21 1.322(13) . ?
C21 H21A 0.990 . ?
C21 H21B 0.990 . ?
O1A C14A 1.464(9) . ?
O1A C21A 1.460(9) . ?
C14A H14C 0.990 . ?
C14A H14D 0.990 . ?
C14A C15A 1.284(12) . ?
C15A H15C 0.990 . ?
C15A H15D 0.990 . ?
C15A O2A 1.451(9) . ?
O2A C16A 1.451(9) . ?
C16A H16C 0.990 . ?
C16A H16D 0.990 . ?
C16A C17A 1.296(12) . ?
C17A H17C 0.990 . ?
C17A H17D 0.990 . ?
C17A O3A 1.456(9) . ?
O3A C18A 1.479(9) . ?
C18A H18C 0.990 . ?
C18A H18D 0.990 . ?
C18A C19A 1.292(12) . ?
C19A H19C 0.990 . ?
C19A H19D 0.990 . ?
C19A O4A 1.470(9) . ?
O4A C20A 1.472(9) . ?
C20A H20C 0.990 . ?
C20A H20D 0.990 . ?
C20A C21A 1.269(12) . ?
C21A H21C 0.990 . ?
C21A H21D 0.990 . ?

loop_
 _geom_angle_atom_site_label_1
 _geom_angle_atom_site_label_2
 _geom_angle_atom_site_label_3
 _geom_angle
 _geom_angle_site_symmetry_1
 _geom_angle_site_symmetry_3
 _geom_angle_publ_flag
B1 P B2 111.0(2) . . ?
B1 P C1 115.39(19) . . ?
B1 P C8 102.48(18) . . ?
B2 P C1 111.68(18) . . ?
B2 P C8 113.6(2) . . ?
C1 P C8 102.20(16) . . ?
P B1 H1A 110(2) . . ?
P B1 H1B 105(3) . . ?
P B1 H1C 111(3) . . ?
H1A B1 H1B 107(4) . . ?
H1A B1 H1C 112(4) . . ?
H1B B1 H1C 111(4) . . ?
P B2 H2A 109(4) . . ?
P B2 H2B 116(3) . . ?
P B2 H2C 111(3) . . ?
H2A B2 H2B 107(5) . . ?
H2A B2 H2C 112(5) . . ?
H2B B2 H2C 102(5) . . ?
C1 Si1 C2 106.91(19) . . ?
C1 Si1 C3 113.47(19) . . ?
C1 Si1 C4 113.26(18) . . ?
C2 Si1 C3 109.5(2) . . ?
C2 Si1 C4 104.8(3) . . ?
C3 Si1 C4 108.5(2) . . ?
C1 Si2 C5 112.06(19) . . ?
C1 Si2 C6 108.16(17) . . ?
C1 Si2 C7 111.95(18) . . ?
C5 Si2 C6 104.9(2) . . ?
C5 Si2 C7 106.9(2) . . ?
C6 Si2 C7 112.7(2) . . ?
P C1 Si1 113.42(18) . . ?
P C1 Si2 114.34(17) . . ?
P C1 H1 103.0 . . ?
Si1 C1 Si2 117.44(18) . . ?
Si1 C1 H1 103.0 . . ?
Si2 C1 H1 103.0 . . ?
Si1 C2 H2D 109.5 . . ?
Si1 C2 H2E 109.5 . . ?
Si1 C2 H2F 109.5 . . ?
H2D C2 H2E 109.5 . . ?
H2D C2 H2F 109.5 . . ?
H2E C2 H2F 109.5 . . ?
Si1 C3 H3A 109.5 . . ?
Si1 C3 H3B 109.5 . . ?
Si1 C3 H3C 109.5 . . ?
H3A C3 H3B 109.5 . . ?
H3A C3 H3C 109.5 . . ?
H3B C3 H3C 109.5 . . ?
Si1 C4 H4A 109.5 . . ?
Si1 C4 H4B 109.5 . . ?
Si1 C4 H4C 109.5 . . ?
H4A C4 H4B 109.5 . . ?
H4A C4 H4C 109.5 . . ?
H4B C4 H4C 109.5 . . ?
Si2 C5 H5A 109.5 . . ?
Si2 C5 H5B 109.5 . . ?
Si2 C5 H5C 109.5 . . ?
H5A C5 H5B 109.5 . . ?
H5A C5 H5C 109.5 . . ?
H5B C5 H5C 109.5 . . ?
Si2 C6 H6A 109.5 . . ?
Si2 C6 H6B 109.5 . . ?
Si2 C6 H6C 109.5 . . ?
H6A C6 H6B 109.5 . . ?
H6A C6 H6C 109.5 . . ?
H6B C6 H6C 109.5 . . ?
Si2 C7 H7A 109.5 . . ?
Si2 C7 H7B 109.5 . . ?
Si2 C7 H7C 109.5 . . ?
H7A C7 H7B 109.5 . . ?
H7A C7 H7C 109.5 . . ?
H7B C7 H7C 109.5 . . ?
P C8 C9 122.6(3) . . ?
P C8 C13 119.8(3) . . ?
C9 C8 C13 117.4(4) . . ?
C8 C9 H9 119.6 . . ?
C8 C9 C10 120.8(4) . . ?
H9 C9 C10 119.6 . . ?
C9 C10 H10 119.8 . . ?
C9 C10 C11 120.4(4) . . ?
H10 C10 C11 119.8 . . ?
C10 C11 H11 120.1 . . ?
C10 C11 C12 119.8(4) . . ?
H11 C11 C12 120.1 . . ?
C11 C12 H12 120.1 . . ?
C11 C12 C13 119.8(4) . . ?
H12 C12 C13 120.1 . . ?
C8 C13 C12 121.6(4) . . ?
C8 C13 H13 119.2 . . ?
C12 C13 H13 119.2 . . ?
B1 Li H1A 26.7(14) . . ?
B1 Li H1B 28.0(12) . . ?
B1 Li H1C 27.6(12) . . ?
B1 Li O1 110.6(3) . . ?
B1 Li O2 116.4(3) . . ?
B1 Li O3 116.8(3) . . ?
B1 Li O4 120.3(4) . . ?
B1 Li O1A 111.7(4) . . ?
B1 Li O2A 117.6(5) . . ?
B1 Li O3A 120.3(5) . . ?
B1 Li O4A 116.0(5) . . ?
H1A Li H1B 46.6(17) . . ?
H1A Li H1C 47.6(18) . . ?
H1A Li O1 84.8(14) . . ?
H1A Li O2 105.7(13) . . ?
H1A Li O3 141.8(14) . . ?
H1A Li O4 123.4(13) . . ?
H1A Li O1A 87.1(15) . . ?
H1A Li O2A 122.3(13) . . ?
H1A Li O3A 144.3(15) . . ?
H1A Li O4A 101.8(13) . . ?
H1B Li H1C 46.7(17) . . ?
H1B Li O1 128.3(13) . . ?
H1B Li O2 96.1(13) . . ?
H1B Li O3 95.5(13) . . ?
H1B Li O4 137.5(13) . . ?
H1B Li O1A 111.6(13) . . ?
H1B Li O2A 90.0(13) . . ?
H1B Li O3A 113.1(13) . . ?
H1B Li O4A 144.0(14) . . ?
H1C Li O1 116.8(12) . . ?
H1C Li O2 142.3(13) . . ?
H1C Li O3 106.2(13) . . ?
H1C Li O4 94.1(13) . . ?
H1C Li O1A 133.8(13) . . ?
H1C Li O2A 131.4(13) . . ?
H1C Li O3A 96.8(14) . . ?
H1C Li O4A 101.1(13) . . ?
O1 Li O2 78.9(3) . . ?
O1 Li O3 132.5(3) . . ?
O1 Li O4 79.1(3) . . ?
O2 Li O3 79.2(3) . . ?
O2 Li O4 123.3(3) . . ?
O3 Li O4 78.7(3) . . ?
O1A Li O2A 75.3(4) . . ?
O1A Li O3A 127.9(6) . . ?
O1A Li O4A 77.3(4) . . ?
O2A Li O3A 79.2(4) . . ?
O2A Li O4A 125.6(6) . . ?
O3A Li O4A 82.2(5) . . ?
Li O1 C14 105.4(5) . . ?
Li O1 C21 107.8(6) . . ?
C14 O1 C21 124.8(8) . . ?
O1 C14 H14A 105.9 . . ?
O1 C14 H14B 105.9 . . ?
O1 C14 C15 125.8(9) . . ?
H14A C14 H14B 106.2 . . ?
H14A C14 C15 105.9 . . ?
H14B C14 C15 105.9 . . ?
C14 C15 H15A 108.5 . . ?
C14 C15 H15B 108.5 . . ?
C14 C15 O2 114.9(8) . . ?
H15A C15 H15B 107.5 . . ?
H15A C15 O2 108.5 . . ?
H15B C15 O2 108.5 . . ?
Li O2 C15 112.6(5) . . ?
Li O2 C16 111.9(4) . . ?
C15 O2 C16 113.5(6) . . ?
O2 C16 H16A 110.7 . . ?
O2 C16 H16B 110.7 . . ?
O2 C16 C17 105.3(5) . . ?
H16A C16 H16B 108.8 . . ?
H16A C16 C17 110.7 . . ?
H16B C16 C17 110.7 . . ?
C16 C17 H17A 109.6 . . ?
C16 C17 H17B 109.6 . . ?
C16 C17 O3 110.3(5) . . ?
H17A C17 H17B 108.1 . . ?
H17A C17 O3 109.6 . . ?
H17B C17 O3 109.6 . . ?
Li O3 C17 108.4(4) . . ?
Li O3 C18 112.3(4) . . ?
C17 O3 C18 114.1(5) . . ?
O3 C18 H18A 110.1 . . ?
O3 C18 H18B 110.1 . . ?
O3 C18 C19 108.1(6) . . ?
H18A C18 H18B 108.4 . . ?
H18A C18 C19 110.1 . . ?
H18B C18 C19 110.1 . . ?
C18 C19 H19A 108.9 . . ?
C18 C19 H19B 108.9 . . ?
C18 C19 O4 113.2(7) . . ?
H19A C19 H19B 107.8 . . ?
H19A C19 O4 108.9 . . ?
H19B C19 O4 108.9 . . ?
Li O4 C19 108.1(5) . . ?
Li O4 C20 110.0(5) . . ?
C19 O4 C20 128.5(7) . . ?
O4 C20 H20A 108.2 . . ?
O4 C20 H20B 108.2 . . ?
O4 C20 C21 116.6(8) . . ?
H20A C20 H20B 107.3 . . ?
H20A C20 C21 108.2 . . ?
H20B C20 C21 108.2 . . ?
O1 C21 C20 120.8(8) . . ?
O1 C21 H21A 107.1 . . ?
O1 C21 H21B 107.1 . . ?
C20 C21 H21A 107.1 . . ?
C20 C21 H21B 107.1 . . ?
H21A C21 H21B 106.8 . . ?
Li O1A C14A 108.1(8) . . ?
Li O1A C21A 105.7(8) . . ?
C14A O1A C21A 98.5(11) . . ?
O1A C14A H14C 107.9 . . ?
O1A C14A H14D 107.9 . . ?
O1A C14A C15A 117.5(12) . . ?
H14C C14A H14D 107.2 . . ?
H14C C14A C15A 107.9 . . ?
H14D C14A C15A 107.9 . . ?
C14A C15A H15C 108.5 . . ?
C14A C15A H15D 108.5 . . ?
C14A C15A O2A 115.1(11) . . ?
H15C C15A H15D 107.5 . . ?
H15C C15A O2A 108.5 . . ?
H15D C15A O2A 108.5 . . ?
Li O2A C15A 107.2(9) . . ?
Li O2A C16A 108.8(7) . . ?
C15A O2A C16A 102.3(12) . . ?
O2A C16A H16C 107.6 . . ?
O2A C16A H16D 107.6 . . ?
O2A C16A C17A 118.9(10) . . ?
H16C C16A H16D 107.0 . . ?
H16C C16A C17A 107.6 . . ?
H16D C16A C17A 107.6 . . ?
C16A C17A H17C 107.6 . . ?
C16A C17A H17D 107.6 . . ?
C16A C17A O3A 118.9(10) . . ?
H17C C17A H17D 107.0 . . ?
H17C C17A O3A 107.6 . . ?
H17D C17A O3A 107.6 . . ?
Li O3A C17A 113.8(8) . . ?
Li O3A C18A 104.8(9) . . ?
C17A O3A C18A 95.4(11) . . ?
O3A C18A H18C 108.6 . . ?
O3A C18A H18D 108.6 . . ?
O3A C18A C19A 114.8(11) . . ?
H18C C18A H18D 107.5 . . ?
H18C C18A C19A 108.6 . . ?
H18D C18A C19A 108.6 . . ?
C18A C19A H19C 108.1 . . ?
C18A C19A H19D 108.1 . . ?
C18A C19A O4A 116.9(11) . . ?
H19C C19A H19D 107.3 . . ?
H19C C19A O4A 108.1 . . ?
H19D C19A O4A 108.1 . . ?
Li O4A C19A 106.8(8) . . ?
Li O4A C20A 112.7(8) . . ?
C19A O4A C20A 98.2(11) . . ?
O4A C20A H20C 107.6 . . ?
O4A C20A H20D 107.6 . . ?
O4A C20A C21A 119.0(10) . . ?
H20C C20A H20D 107.0 . . ?
H20C C20A C21A 107.6 . . ?
H20D C20A C21A 107.6 . . ?
O1A C21A C20A 120.4(10) . . ?
O1A C21A H21C 107.2 . . ?
O1A C21A H21D 107.2 . . ?
C20A C21A H21C 107.2 . . ?
C20A C21A H21D 107.2 . . ?
H21C C21A H21D 106.9 . . ?

_diffrn_measured_fraction_theta_max    0.976
_diffrn_reflns_theta_full              62.31
_diffrn_measured_fraction_theta_full   0.976
_refine_diff_density_max    0.911
_refine_diff_density_min   -0.987
_refine_diff_density_rms    0.073

#===END

data_ki320_compound_17

_audit_creation_method            SHELXL-97
_chemical_name_systematic
;
 ?
;
_chemical_name_common             ?
_chemical_melting_point           ?
_chemical_formula_moiety          'C42 H92 B4 Na2 O4 P2 Si4'
_chemical_formula_sum             'C42 H92 B4 Na2 O4 P2 Si4'
_chemical_formula_weight          924.68

loop_
 _atom_type_symbol
 _atom_type_description
 _atom_type_scat_dispersion_real
 _atom_type_scat_dispersion_imag
 _atom_type_scat_source
 'C'  'C'   0.0033   0.0016
 'International Tables Vol C Tables 4.2.6.8 and 6.1.1.4'
 'H'  'H'   0.0000   0.0000
 'International Tables Vol C Tables 4.2.6.8 and 6.1.1.4'
 'B'  'B'   0.0013   0.0007
 'International Tables Vol C Tables 4.2.6.8 and 6.1.1.4'
 'Na'  'Na'   0.0362   0.0249
 'International Tables Vol C Tables 4.2.6.8 and 6.1.1.4'
 'Si'  'Si'   0.0817   0.0704
 'International Tables Vol C Tables 4.2.6.8 and 6.1.1.4'
 'P'  'P'   0.1023   0.0942
 'International Tables Vol C Tables 4.2.6.8 and 6.1.1.4'
 'O'  'O'   0.0106   0.0060
 'International Tables Vol C Tables 4.2.6.8 and 6.1.1.4'

_symmetry_cell_setting            triclinic
_symmetry_space_group_name_H-M    'P -1'

loop_
 _symmetry_equiv_pos_as_xyz
 'x, y, z'
 '-x, -y, -z'

_cell_length_a                    9.661(3)
_cell_length_b                    12.453(2)
_cell_length_c                    12.956(4)
_cell_angle_alpha                 85.291(18)
_cell_angle_beta                  71.807(19)
_cell_angle_gamma                 81.117(16)
_cell_volume                      1462.0(6)
_cell_formula_units_Z             1
_cell_measurement_temperature     150(2)
_cell_measurement_reflns_used     240
_cell_measurement_theta_min       2.50
_cell_measurement_theta_max       27.50

_exptl_crystal_description        block
_exptl_crystal_colour             colourless
_exptl_crystal_size_max           0.40
_exptl_crystal_size_mid           0.30
_exptl_crystal_size_min           0.30
_exptl_crystal_density_meas       ?
_exptl_crystal_density_diffrn     1.050
_exptl_crystal_density_method     'not measured'
_exptl_crystal_F_000              504
_exptl_absorpt_coefficient_mu     0.204
_exptl_absorpt_correction_type    multi-scan
_exptl_absorpt_correction_T_min   0.923
_exptl_absorpt_correction_T_max   0.941
_exptl_absorpt_process_details    SADABS

_exptl_special_details
;
 ?
;

_diffrn_ambient_temperature       150(2)
_diffrn_radiation_wavelength      0.71073
_diffrn_radiation_type            MoK\a
_diffrn_radiation_source          'sealed tube'
_diffrn_radiation_monochromator   graphite
_diffrn_measurement_device_type   'Nonius KappaCCD diffractometer'
_diffrn_measurement_method        '\f and \w scans'
_diffrn_detector_area_resol_mean  ?
_diffrn_reflns_number             23357
_diffrn_reflns_av_R_equivalents   0.0846
_diffrn_reflns_av_sigmaI/netI     0.0617
_diffrn_reflns_limit_h_min        -11
_diffrn_reflns_limit_h_max        11
_diffrn_reflns_limit_k_min        -14
_diffrn_reflns_limit_k_max        14
_diffrn_reflns_limit_l_min        -15
_diffrn_reflns_limit_l_max        15
_diffrn_reflns_theta_min          3.95
_diffrn_reflns_theta_max          25.00
_reflns_number_total              5118
_reflns_number_gt                 4089
_reflns_threshold_expression      I>2\s(I)

_computing_data_collection        'Nonius COLLECT'
_computing_cell_refinement        EvalCCD
_computing_data_reduction         EvalCCD
_computing_structure_solution     'Bruker SHELXTL'
_computing_structure_refinement   'Bruker SHELXTL'
_computing_molecular_graphics     'Bruker SHELXTL'
_computing_publication_material   'Bruker SHELXTL and local programs'

_refine_special_details
;
 Refinement of F^2^ against ALL reflections.  The weighted R-factor wR and
 goodness of fit S are based on F^2^, conventional R-factors R are based
 on F, with F set to zero for negative F^2^. The threshold expression of
 F^2^ > 2sigma(F^2^) is used only for calculating R-factors(gt) etc. and is
 not relevant to the choice of reflections for refinement.  R-factors based
 on F^2^ are statistically about twice as large as those based on F, and R-
 factors based on ALL data will be even larger.
;

_refine_ls_structure_factor_coef  Fsqd
_refine_ls_matrix_type            full
_refine_ls_weighting_scheme       calc
_refine_ls_weighting_details
 'calc w=1/[\s^2^(Fo^2^)+(0.0683P)^2^+1.1159P] where P=(Fo^2^+2Fc^2^)/3'
_atom_sites_solution_primary      direct
_atom_sites_solution_secondary    difmap
_atom_sites_solution_hydrogens    mixed
_refine_ls_hydrogen_treatment     mixed
_refine_ls_extinction_method      none
_refine_ls_extinction_coef        ?
_refine_ls_number_reflns          5118
_refine_ls_number_parameters      292
_refine_ls_number_restraints      0
_refine_ls_R_factor_all           0.0680
_refine_ls_R_factor_gt            0.0505
_refine_ls_wR_factor_ref          0.1486
_refine_ls_wR_factor_gt           0.1270
_refine_ls_goodness_of_fit_ref    1.062
_refine_ls_restrained_S_all       1.062
_refine_ls_shift/su_max           0.001
_refine_ls_shift/su_mean          0.000

loop_
 _atom_site_label
 _atom_site_type_symbol
 _atom_site_fract_x
 _atom_site_fract_y
 _atom_site_fract_z
 _atom_site_U_iso_or_equiv
 _atom_site_adp_type
 _atom_site_occupancy
 _atom_site_symmetry_multiplicity
 _atom_site_calc_flag
 _atom_site_refinement_flags
 _atom_site_disorder_assembly
 _atom_site_disorder_group
P P 0.19015(6) 0.63768(4) 0.70039(5) 0.02560(17) Uani 1 1 d . . .
B1 B 0.3663(3) 0.5316(2) 0.6529(2) 0.0331(6) Uani 1 1 d . . .
H1A H 0.467(3) 0.569(2) 0.631(2) 0.033(7) Uiso 1 1 d . . .
H1B H 0.350(3) 0.500(2) 0.578(2) 0.040(7) Uiso 1 1 d . . .
H1C H 0.369(3) 0.465(2) 0.715(2) 0.049(8) Uiso 1 1 d . . .
B2 B 0.1840(3) 0.7460(2) 0.5830(2) 0.0315(6) Uani 1 1 d . . .
H2A H 0.198(3) 0.699(2) 0.513(2) 0.032(6) Uiso 1 1 d . . .
H2B H 0.286(3) 0.791(2) 0.573(2) 0.043(7) Uiso 1 1 d . . .
H2C H 0.074(3) 0.798(2) 0.602(2) 0.040(7) Uiso 1 1 d . . .
Si1 Si -0.00603(7) 0.80615(5) 0.87425(6) 0.0325(2) Uani 1 1 d . . .
Si2 Si 0.34101(7) 0.73214(5) 0.85128(5) 0.03162(19) Uani 1 1 d . . .
C1 C 0.1625(2) 0.69776(18) 0.83348(18) 0.0261(5) Uani 1 1 d . . .
H1 H 0.1358 0.6365 0.8875 0.031 Uiso 1 1 calc R . .
C2 C -0.1707(3) 0.7738(2) 0.8394(2) 0.0437(7) Uani 1 1 d . . .
H2D H -0.2561 0.8277 0.8710 0.066 Uiso 1 1 calc R . .
H2E H -0.1922 0.7011 0.8689 0.066 Uiso 1 1 calc R . .
H2F H -0.1493 0.7758 0.7602 0.066 Uiso 1 1 calc R . .
C3 C -0.0710(3) 0.8141(2) 1.0270(2) 0.0483(7) Uani 1 1 d . . .
H3A H -0.1566 0.8703 1.0487 0.072 Uiso 1 1 calc R . .
H3B H 0.0082 0.8325 1.0517 0.072 Uiso 1 1 calc R . .
H3C H -0.0985 0.7437 1.0598 0.072 Uiso 1 1 calc R . .
C4 C 0.0378(3) 0.9419(2) 0.8093(2) 0.0463(7) Uani 1 1 d . . .
H4A H -0.0465 0.9975 0.8380 0.070 Uiso 1 1 calc R . .
H4B H 0.0591 0.9392 0.7304 0.070 Uiso 1 1 calc R . .
H4C H 0.1239 0.9600 0.8255 0.070 Uiso 1 1 calc R . .
C5 C 0.4511(3) 0.6053(2) 0.8871(2) 0.0471(7) Uani 1 1 d . . .
H5A H 0.5431 0.6231 0.8940 0.071 Uiso 1 1 calc R . .
H5B H 0.4733 0.5529 0.8298 0.071 Uiso 1 1 calc R . .
H5C H 0.3944 0.5737 0.9563 0.071 Uiso 1 1 calc R . .
C6 C 0.3049(3) 0.8256(2) 0.9677(2) 0.0452(7) Uani 1 1 d . . .
H6A H 0.3986 0.8428 0.9719 0.068 Uiso 1 1 calc R . .
H6B H 0.2537 0.7894 1.0360 0.068 Uiso 1 1 calc R . .
H6C H 0.2437 0.8929 0.9555 0.068 Uiso 1 1 calc R . .
C7 C 0.4555(3) 0.8036(2) 0.7283(2) 0.0412(6) Uani 1 1 d . . .
H7A H 0.5422 0.8221 0.7431 0.062 Uiso 1 1 calc R . .
H7B H 0.3971 0.8703 0.7111 0.062 Uiso 1 1 calc R . .
H7C H 0.4868 0.7557 0.6664 0.062 Uiso 1 1 calc R . .
C8 C 0.0369(3) 0.55728(18) 0.72453(19) 0.0290(5) Uani 1 1 d . . .
C9 C -0.0412(3) 0.5614(2) 0.6489(2) 0.0395(6) Uani 1 1 d . . .
H9 H -0.0178 0.6086 0.5864 0.047 Uiso 1 1 calc R . .
C10 C -0.1528(3) 0.4968(2) 0.6645(3) 0.0486(7) Uani 1 1 d . . .
H10 H -0.2036 0.4995 0.6121 0.058 Uiso 1 1 calc R . .
C11 C -0.1893(3) 0.4290(2) 0.7564(3) 0.0490(7) Uani 1 1 d . . .
H11 H -0.2665 0.3862 0.7678 0.059 Uiso 1 1 calc R . .
C12 C -0.1128(3) 0.4237(2) 0.8314(3) 0.0482(7) Uani 1 1 d . . .
H12 H -0.1379 0.3769 0.8941 0.058 Uiso 1 1 calc R . .
C13 C 0.0010(3) 0.4865(2) 0.8161(2) 0.0388(6) Uani 1 1 d . . .
H13 H 0.0536 0.4812 0.8676 0.047 Uiso 1 1 calc R . .
Na Na 0.46261(10) 0.65735(7) 0.43988(7) 0.0326(2) Uani 1 1 d . . .
O1 O 0.6492(2) 0.76157(14) 0.42796(16) 0.0422(5) Uani 1 1 d . . .
C14 C 0.7992(3) 0.7142(3) 0.4146(4) 0.0692(11) Uani 1 1 d . . .
H14A H 0.8378 0.6709 0.3484 0.083 Uiso 1 1 calc R . .
H14B H 0.8049 0.6656 0.4780 0.083 Uiso 1 1 calc R . .
C15 C 0.8882(4) 0.8061(3) 0.4051(3) 0.0581(8) Uani 1 1 d . . .
H15A H 0.9294 0.8307 0.3284 0.070 Uiso 1 1 calc R . .
H15B H 0.9691 0.7851 0.4376 0.070 Uiso 1 1 calc R . .
C16 C 0.7726(4) 0.8926(3) 0.4697(3) 0.0613(9) Uani 1 1 d . . .
H16A H 0.7586 0.8811 0.5487 0.074 Uiso 1 1 calc R . .
H16B H 0.7993 0.9664 0.4467 0.074 Uiso 1 1 calc R . .
C17 C 0.6362(3) 0.8762(2) 0.4421(3) 0.0491(7) Uani 1 1 d . . .
H17A H 0.5464 0.9005 0.5016 0.059 Uiso 1 1 calc R . .
H17B H 0.6316 0.9177 0.3744 0.059 Uiso 1 1 calc R . .
O2 O 0.4143(2) 0.75858(15) 0.28898(15) 0.0411(4) Uani 1 1 d . . .
C18 C 0.5304(3) 0.7771(3) 0.1909(2) 0.0495(7) Uani 1 1 d . . .
H18A H 0.5205 0.7390 0.1300 0.059 Uiso 1 1 calc R . .
H18B H 0.6274 0.7500 0.2009 0.059 Uiso 1 1 calc R . .
C19 C 0.5162(4) 0.8988(3) 0.1675(3) 0.0534(8) Uani 1 1 d . . .
H19A H 0.5931 0.9309 0.1855 0.064 Uiso 1 1 calc R . .
H19B H 0.5242 0.9159 0.0900 0.064 Uiso 1 1 calc R . .
C20 C 0.3650(4) 0.9409(3) 0.2401(4) 0.0870(14) Uani 1 1 d . . .
H20A H 0.3725 0.9881 0.2954 0.104 Uiso 1 1 calc R . .
H20B H 0.3062 0.9837 0.1967 0.104 Uiso 1 1 calc R . .
C21 C 0.2947(3) 0.8444(2) 0.2933(3) 0.0514(7) Uani 1 1 d . . .
H21A H 0.2356 0.8589 0.3695 0.062 Uiso 1 1 calc R . .
H21B H 0.2298 0.8248 0.2539 0.062 Uiso 1 1 calc R . .

loop_
 _atom_site_aniso_label
 _atom_site_aniso_U_11
 _atom_site_aniso_U_22
 _atom_site_aniso_U_33
 _atom_site_aniso_U_23
 _atom_site_aniso_U_13
 _atom_site_aniso_U_12
P 0.0270(3) 0.0225(3) 0.0256(3) -0.0005(2) -0.0057(2) -0.0031(2)
B1 0.0310(15) 0.0275(14) 0.0360(15) -0.0025(12) -0.0059(12) 0.0019(11)
B2 0.0347(15) 0.0292(14) 0.0294(14) 0.0035(11) -0.0093(12) -0.0038(12)
Si1 0.0318(4) 0.0257(3) 0.0367(4) -0.0055(3) -0.0067(3) 0.0011(3)
Si2 0.0318(4) 0.0349(4) 0.0294(4) 0.0002(3) -0.0102(3) -0.0071(3)
C1 0.0274(12) 0.0239(11) 0.0249(11) -0.0006(9) -0.0055(9) -0.0027(9)
C2 0.0328(14) 0.0373(14) 0.0586(18) -0.0087(13) -0.0129(13) 0.0041(11)
C3 0.0434(16) 0.0510(17) 0.0417(16) -0.0146(13) -0.0015(13) 0.0024(13)
C4 0.0561(18) 0.0254(13) 0.0572(18) -0.0045(12) -0.0184(14) -0.0007(12)
C5 0.0386(15) 0.0547(17) 0.0495(17) 0.0034(13) -0.0195(13) -0.0008(13)
C6 0.0520(17) 0.0511(16) 0.0390(15) -0.0045(12) -0.0173(13) -0.0174(13)
C7 0.0416(15) 0.0487(16) 0.0359(14) 0.0019(12) -0.0105(12) -0.0182(12)
C8 0.0292(12) 0.0226(11) 0.0318(12) -0.0053(9) -0.0037(10) -0.0026(9)
C9 0.0426(15) 0.0400(14) 0.0390(15) 0.0009(11) -0.0137(12) -0.0133(12)
C10 0.0440(16) 0.0505(17) 0.0577(18) -0.0067(14) -0.0200(14) -0.0143(13)
C11 0.0401(16) 0.0401(15) 0.064(2) -0.0066(14) -0.0059(14) -0.0168(12)
C12 0.0511(17) 0.0350(14) 0.0550(18) 0.0049(12) -0.0070(14) -0.0179(13)
C13 0.0440(15) 0.0315(13) 0.0409(15) 0.0021(11) -0.0111(12) -0.0110(11)
Na 0.0323(5) 0.0279(5) 0.0351(5) 0.0016(4) -0.0080(4) -0.0023(4)
O1 0.0349(10) 0.0318(9) 0.0604(12) -0.0057(8) -0.0158(9) -0.0015(8)
C14 0.0398(18) 0.0467(18) 0.123(3) -0.0065(19) -0.028(2) -0.0010(14)
C15 0.0458(18) 0.0582(19) 0.077(2) 0.0095(16) -0.0251(16) -0.0197(15)
C16 0.085(3) 0.0528(19) 0.0502(18) -0.0034(15) -0.0143(17) -0.0331(18)
C17 0.0559(18) 0.0281(13) 0.0531(18) 0.0014(12) -0.0046(14) -0.0015(12)
O2 0.0359(10) 0.0405(10) 0.0394(10) 0.0100(8) -0.0055(8) -0.0012(8)
C18 0.0430(16) 0.0569(18) 0.0382(15) 0.0095(13) -0.0029(13) -0.0014(13)
C19 0.0559(19) 0.0574(19) 0.0513(18) 0.0154(14) -0.0191(15) -0.0244(15)
C20 0.050(2) 0.0392(18) 0.152(4) 0.021(2) -0.010(2) -0.0043(15)
C21 0.0431(16) 0.0473(17) 0.0556(18) 0.0122(14) -0.0104(14) 0.0013(13)

_geom_special_details
;
 All esds (except the esd in the dihedral angle between two l.s. planes)
 are estimated using the full covariance matrix.  The cell esds are taken
 into account individually in the estimation of esds in distances, angles
 and torsion angles; correlations between esds in cell parameters are only
 used when they are defined by crystal symmetry.  An approximate (isotropic)
 treatment of cell esds is used for estimating esds involving l.s. planes.
;

loop_
 _geom_bond_atom_site_label_1
 _geom_bond_atom_site_label_2
 _geom_bond_distance
 _geom_bond_site_symmetry_2
 _geom_bond_publ_flag
P B1 1.950(3) . ?
P B2 1.958(3) . ?
P C1 1.862(2) . ?
P C8 1.846(2) . ?
B1 H1A 1.09(3) . ?
B1 H1B 1.14(3) . ?
B1 H1C 1.11(3) . ?
B2 H2A 1.08(3) . ?
B2 H2B 1.18(3) . ?
B2 H2C 1.13(3) . ?
Si1 C1 1.911(2) . ?
Si1 C2 1.891(3) . ?
Si1 C3 1.886(3) . ?
Si1 C4 1.874(3) . ?
Si2 C1 1.925(2) . ?
Si2 C5 1.873(3) . ?
Si2 C6 1.894(3) . ?
Si2 C7 1.877(3) . ?
C1 H1 1.000 . ?
C2 H2D 0.980 . ?
C2 H2E 0.980 . ?
C2 H2F 0.980 . ?
C3 H3A 0.980 . ?
C3 H3B 0.980 . ?
C3 H3C 0.980 . ?
C4 H4A 0.980 . ?
C4 H4B 0.980 . ?
C4 H4C 0.980 . ?
C5 H5A 0.980 . ?
C5 H5B 0.980 . ?
C5 H5C 0.980 . ?
C6 H6A 0.980 . ?
C6 H6B 0.980 . ?
C6 H6C 0.980 . ?
C7 H7A 0.980 . ?
C7 H7B 0.980 . ?
C7 H7C 0.980 . ?
C8 C9 1.405(4) . ?
C8 C13 1.404(3) . ?
C9 H9 0.950 . ?
C9 C10 1.398(4) . ?
C10 H10 0.950 . ?
C10 C11 1.386(4) . ?
C11 H11 0.950 . ?
C11 C12 1.385(4) . ?
C12 H12 0.950 . ?
C12 C13 1.401(4) . ?
C13 H13 0.950 . ?
Na H1A 2.63(2) . ?
Na H1A 2.95(3) 2_666 ?
Na H1B 2.67(3) . ?
Na H1B 2.42(3) 2_666 ?
Na H1C 2.59(3) 2_666 ?
Na H2A 2.42(2) . ?
Na H2B 2.54(3) . ?
Na O1 2.339(2) . ?
Na O2 2.369(2) . ?
O1 C14 1.441(4) . ?
O1 C17 1.435(3) . ?
C14 H14A 0.990 . ?
C14 H14B 0.990 . ?
C14 C15 1.510(4) . ?
C15 H15A 0.990 . ?
C15 H15B 0.990 . ?
C15 C16 1.517(5) . ?
C16 H16A 0.990 . ?
C16 H16B 0.990 . ?
C16 C17 1.515(5) . ?
C17 H17A 0.990 . ?
C17 H17B 0.990 . ?
O2 C18 1.438(3) . ?
O2 C21 1.438(3) . ?
C18 H18A 0.990 . ?
C18 H18B 0.990 . ?
C18 C19 1.515(4) . ?
C19 H19A 0.990 . ?
C19 H19B 0.990 . ?
C19 C20 1.510(5) . ?
C20 H20A 0.990 . ?
C20 H20B 0.990 . ?
C20 C21 1.484(4) . ?
C21 H21A 0.990 . ?
C21 H21B 0.990 . ?

loop_
 _geom_angle_atom_site_label_1
 _geom_angle_atom_site_label_2
 _geom_angle_atom_site_label_3
 _geom_angle
 _geom_angle_site_symmetry_1
 _geom_angle_site_symmetry_3
 _geom_angle_publ_flag
B1 P B2 109.59(12) . . ?
B1 P C1 114.59(12) . . ?
B1 P C8 104.19(12) . . ?
B2 P C1 113.75(11) . . ?
B2 P C8 109.06(12) . . ?
C1 P C8 104.99(10) . . ?
P B1 H1A 112.1(13) . . ?
P B1 H1B 101.1(14) . . ?
P B1 H1C 111.6(15) . . ?
H1A B1 H1B 110.6(19) . . ?
H1A B1 H1C 111(2) . . ?
H1B B1 H1C 110(2) . . ?
P B2 H2A 104.6(13) . . ?
P B2 H2B 103.8(14) . . ?
P B2 H2C 110.6(14) . . ?
H2A B2 H2B 112.3(19) . . ?
H2A B2 H2C 108.5(19) . . ?
H2B B2 H2C 116.3(19) . . ?
C1 Si1 C2 114.13(11) . . ?
C1 Si1 C3 108.78(12) . . ?
C1 Si1 C4 111.09(12) . . ?
C2 Si1 C3 104.34(14) . . ?
C2 Si1 C4 107.99(13) . . ?
C3 Si1 C4 110.30(14) . . ?
C1 Si2 C5 109.90(12) . . ?
C1 Si2 C6 112.48(12) . . ?
C1 Si2 C7 113.01(11) . . ?
C5 Si2 C6 105.24(14) . . ?
C5 Si2 C7 110.32(14) . . ?
C6 Si2 C7 105.53(13) . . ?
P C1 Si1 113.44(12) . . ?
P C1 Si2 113.39(12) . . ?
P C1 H1 103.8 . . ?
Si1 C1 Si2 116.56(12) . . ?
Si1 C1 H1 103.8 . . ?
Si2 C1 H1 103.8 . . ?
Si1 C2 H2D 109.5 . . ?
Si1 C2 H2E 109.5 . . ?
Si1 C2 H2F 109.5 . . ?
H2D C2 H2E 109.5 . . ?
H2D C2 H2F 109.5 . . ?
H2E C2 H2F 109.5 . . ?
Si1 C3 H3A 109.5 . . ?
Si1 C3 H3B 109.5 . . ?
Si1 C3 H3C 109.5 . . ?
H3A C3 H3B 109.5 . . ?
H3A C3 H3C 109.5 . . ?
H3B C3 H3C 109.5 . . ?
Si1 C4 H4A 109.5 . . ?
Si1 C4 H4B 109.5 . . ?
Si1 C4 H4C 109.5 . . ?
H4A C4 H4B 109.5 . . ?
H4A C4 H4C 109.5 . . ?
H4B C4 H4C 109.5 . . ?
Si2 C5 H5A 109.5 . . ?
Si2 C5 H5B 109.5 . . ?
Si2 C5 H5C 109.5 . . ?
H5A C5 H5B 109.5 . . ?
H5A C5 H5C 109.5 . . ?
H5B C5 H5C 109.5 . . ?
Si2 C6 H6A 109.5 . . ?
Si2 C6 H6B 109.5 . . ?
Si2 C6 H6C 109.5 . . ?
H6A C6 H6B 109.5 . . ?
H6A C6 H6C 109.5 . . ?
H6B C6 H6C 109.5 . . ?
Si2 C7 H7A 109.5 . . ?
Si2 C7 H7B 109.5 . . ?
Si2 C7 H7C 109.5 . . ?
H7A C7 H7B 109.5 . . ?
H7A C7 H7C 109.5 . . ?
H7B C7 H7C 109.5 . . ?
P C8 C9 120.72(18) . . ?
P C8 C13 120.61(19) . . ?
C9 C8 C13 118.6(2) . . ?
C8 C9 H9 119.6 . . ?
C8 C9 C10 120.9(3) . . ?
H9 C9 C10 119.6 . . ?
C9 C10 H10 120.0 . . ?
C9 C10 C11 120.0(3) . . ?
H10 C10 C11 120.0 . . ?
C10 C11 H11 120.1 . . ?
C10 C11 C12 119.7(3) . . ?
H11 C11 C12 120.1 . . ?
C11 C12 H12 119.5 . . ?
C11 C12 C13 121.0(3) . . ?
H12 C12 C13 119.5 . . ?
C8 C13 C12 119.8(3) . . ?
C8 C13 H13 120.1 . . ?
C12 C13 H13 120.1 . . ?
H1A Na H1A 84.4(8) . 2_666 ?
H1A Na H1B 40.5(8) . . ?
H1A Na H1B 38.3(8) 2_666 2_666 ?
H1A Na H1B 68.5(9) . 2_666 ?
H1A Na H1B 60.7(8) 2_666 . ?
H1A Na H1C 37.5(8) 2_666 2_666 ?
H1A Na H1C 110.7(9) . 2_666 ?
H1A Na H2A 88.5(8) . . ?
H1A Na H2A 108.1(8) 2_666 . ?
H1A Na H2B 76.5(8) . . ?
H1A Na H2B 145.9(8) 2_666 . ?
H1A Na O1 93.4(6) . . ?
H1A Na O1 121.0(5) 2_666 . ?
H1A Na O2 168.2(6) . . ?
H1A Na O2 103.9(5) 2_666 . ?
H1B Na H1B 71.2(10) . 2_666 ?
H1B Na H1C 43.0(9) 2_666 2_666 ?
H1B Na H1C 97.7(9) . 2_666 ?
H1B Na H2A 68.9(8) . . ?
H1B Na H2A 138.3(9) 2_666 . ?
H1B Na H2B 87.1(9) . . ?
H1B Na H2B 144.3(9) 2_666 . ?
H1B Na O1 133.1(6) . . ?
H1B Na O1 86.4(7) 2_666 . ?
H1B Na O2 137.3(6) . . ?
H1B Na O2 123.1(7) 2_666 . ?
H1C Na H2A 132.6(9) 2_666 . ?
H1C Na H2B 172.7(9) 2_666 . ?
H1C Na O1 92.2(6) 2_666 . ?
H1C Na O2 80.6(7) 2_666 . ?
H2A Na H2B 44.4(9) . . ?
H2A Na O1 130.9(6) . . ?
H2A Na O2 81.0(6) . . ?
H2B Na O1 88.5(6) . . ?
H2B Na O2 92.1(6) . . ?
O1 Na O2 89.47(7) . . ?
Na O1 C14 122.70(17) . . ?
Na O1 C17 128.31(17) . . ?
C14 O1 C17 108.7(2) . . ?
O1 C14 H14A 110.2 . . ?
O1 C14 H14B 110.2 . . ?
O1 C14 C15 107.6(3) . . ?
H14A C14 H14B 108.5 . . ?
H14A C14 C15 110.2 . . ?
H14B C14 C15 110.2 . . ?
C14 C15 H15A 111.5 . . ?
C14 C15 H15B 111.5 . . ?
C14 C15 C16 101.4(3) . . ?
H15A C15 H15B 109.3 . . ?
H15A C15 C16 111.5 . . ?
H15B C15 C16 111.5 . . ?
C15 C16 H16A 111.3 . . ?
C15 C16 H16B 111.3 . . ?
C15 C16 C17 102.6(2) . . ?
H16A C16 H16B 109.2 . . ?
H16A C16 C17 111.3 . . ?
H16B C16 C17 111.3 . . ?
O1 C17 C16 105.6(2) . . ?
O1 C17 H17A 110.6 . . ?
O1 C17 H17B 110.6 . . ?
C16 C17 H17A 110.6 . . ?
C16 C17 H17B 110.6 . . ?
H17A C17 H17B 108.7 . . ?
Na O2 C18 121.59(16) . . ?
Na O2 C21 126.10(17) . . ?
C18 O2 C21 107.1(2) . . ?
O2 C18 H18A 110.4 . . ?
O2 C18 H18B 110.4 . . ?
O2 C18 C19 106.7(2) . . ?
H18A C18 H18B 108.6 . . ?
H18A C18 C19 110.4 . . ?
H18B C18 C19 110.4 . . ?
C18 C19 H19A 110.9 . . ?
C18 C19 H19B 110.9 . . ?
C18 C19 C20 104.1(2) . . ?
H19A C19 H19B 109.0 . . ?
H19A C19 C20 110.9 . . ?
H19B C19 C20 110.9 . . ?
C19 C20 H20A 110.4 . . ?
C19 C20 H20B 110.4 . . ?
C19 C20 C21 106.9(3) . . ?
H20A C20 H20B 108.6 . . ?
H20A C20 C21 110.4 . . ?
H20B C20 C21 110.4 . . ?
O2 C21 C20 105.4(2) . . ?
O2 C21 H21A 110.7 . . ?
O2 C21 H21B 110.7 . . ?
C20 C21 H21A 110.7 . . ?
C20 C21 H21B 110.7 . . ?
H21A C21 H21B 108.8 . . ?

_diffrn_measured_fraction_theta_max    0.994
_diffrn_reflns_theta_full              25.00
_diffrn_measured_fraction_theta_full   0.994
_refine_diff_density_max    0.405
_refine_diff_density_min   -0.341
_refine_diff_density_rms    0.063

#===END

data_ki471_compound_18a

_audit_creation_method            SHELXL-97
_chemical_name_systematic
;
 ?
;
_chemical_name_common             ?
_chemical_melting_point           ?
_chemical_formula_moiety          'C30 H68 B4 K2 O P2 Si4'
_chemical_formula_sum             'C30 H68 B4 K2 O P2 Si4'
_chemical_formula_weight          740.58

loop_
 _atom_type_symbol
 _atom_type_description
 _atom_type_scat_dispersion_real
 _atom_type_scat_dispersion_imag
 _atom_type_scat_source
 'C'  'C'   0.0033   0.0016
 'International Tables Vol C Tables 4.2.6.8 and 6.1.1.4'
 'H'  'H'   0.0000   0.0000
 'International Tables Vol C Tables 4.2.6.8 and 6.1.1.4'
 'B'  'B'   0.0013   0.0007
 'International Tables Vol C Tables 4.2.6.8 and 6.1.1.4'
 'Si'  'Si'   0.0817   0.0704
 'International Tables Vol C Tables 4.2.6.8 and 6.1.1.4'
 'K'  'K'   0.2009   0.2494
 'International Tables Vol C Tables 4.2.6.8 and 6.1.1.4'
 'P'  'P'   0.1023   0.0942
 'International Tables Vol C Tables 4.2.6.8 and 6.1.1.4'
 'O'  'O'   0.0106   0.0060
 'International Tables Vol C Tables 4.2.6.8 and 6.1.1.4'

_symmetry_cell_setting            triclinic
_symmetry_space_group_name_H-M    'P -1'

loop_
 _symmetry_equiv_pos_as_xyz
 'x, y, z'
 '-x, -y, -z'

_cell_length_a                    8.4901(4)
_cell_length_b                    9.7266(5)
_cell_length_c                    14.6681(7)
_cell_angle_alpha                 76.367(4)
_cell_angle_beta                  89.297(4)
_cell_angle_gamma                 71.341(4)
_cell_volume                      1112.66(9)
_cell_formula_units_Z             1
_cell_measurement_temperature     150(2)
_cell_measurement_reflns_used     5118
_cell_measurement_theta_min       3.19
_cell_measurement_theta_max       28.42

_exptl_crystal_description        block
_exptl_crystal_colour             colourless
_exptl_crystal_size_max           0.40
_exptl_crystal_size_mid           0.30
_exptl_crystal_size_min           0.30
_exptl_crystal_density_meas       ?
_exptl_crystal_density_diffrn     1.105
_exptl_crystal_density_method     'not measured'
_exptl_crystal_F_000              400
_exptl_absorpt_coefficient_mu     0.414
_exptl_absorpt_correction_type    multi-scan
_exptl_absorpt_correction_T_min   0.852
_exptl_absorpt_correction_T_max   0.886
_exptl_absorpt_process_details
;
CrysAlisPro, Oxford Diffraction Ltd.,
Version 1.171.33.66 (release 28-04-2010 CrysAlis171 .NET)
(compiled Apr 28 2010,14:27:37)
Empirical absorption correction using spherical harmonics,
 implemented in SCALE3 ABSPACK scaling algorithm.
;

_exptl_special_details
;
 ?
;

_diffrn_ambient_temperature       150(2)
_diffrn_radiation_wavelength      0.71073
_diffrn_radiation_type            MoK\a
_diffrn_radiation_source          'sealed tube with Enhance optics'
_diffrn_radiation_monochromator   none
_diffrn_measurement_device_type
'Oxford Diffraction Gemini A Ultra diffractometer'
_diffrn_measurement_method        '\w scans'
_diffrn_detector_area_resol_mean  10.3968
_diffrn_reflns_number             10096
_diffrn_reflns_av_R_equivalents   0.0269
_diffrn_reflns_av_sigmaI/netI     0.0499
_diffrn_reflns_limit_h_min        -11
_diffrn_reflns_limit_h_max        10
_diffrn_reflns_limit_k_min        -12
_diffrn_reflns_limit_k_max        11
_diffrn_reflns_limit_l_min        -19
_diffrn_reflns_limit_l_max        17
_diffrn_reflns_theta_min          3.20
_diffrn_reflns_theta_max          28.48
_reflns_number_total              4636
_reflns_number_gt                 3377
_reflns_threshold_expression      I>2\s(I)

_computing_data_collection
;
CrysAlisPro, Oxford Diffraction Ltd.,
Version 1.171.33.66 (release 28-04-2010 CrysAlis171 .NET)
(compiled Apr 28 2010,14:27:37)
;
_computing_cell_refinement
;
CrysAlisPro, Oxford Diffraction Ltd.,
Version 1.171.33.66 (release 28-04-2010 CrysAlis171 .NET)
(compiled Apr 28 2010,14:27:37)
;
_computing_data_reduction
;
CrysAlisPro, Oxford Diffraction Ltd.,
Version 1.171.33.66 (release 28-04-2010 CrysAlis171 .NET)
(compiled Apr 28 2010,14:27:37)
;
_computing_structure_solution     'Bruker SHELXTL'
_computing_structure_refinement   'Bruker SHELXTL'
_computing_molecular_graphics     'Bruker SHELXTL'
_computing_publication_material   'Bruker SHELXTL and local programs'

_refine_special_details
;
 Refinement of F^2^ against ALL reflections.  The weighted R-factor wR and
 goodness of fit S are based on F^2^, conventional R-factors R are based
 on F, with F set to zero for negative F^2^. The threshold expression of
 F^2^ > 2sigma(F^2^) is used only for calculating R-factors(gt) etc. and is
 not relevant to the choice of reflections for refinement.  R-factors based
 on F^2^ are statistically about twice as large as those based on F, and R-
 factors based on ALL data will be even larger.

The THF ligand is disordered over an inversion centre, such that there
is only one THF ligand for 2 potassium ions.  Restraints were applied
to geometry and displacement parameters of this ligand.
;

_refine_ls_structure_factor_coef  Fsqd
_refine_ls_matrix_type            full
_refine_ls_weighting_scheme       calc
_refine_ls_weighting_details
 'calc w=1/[\s^2^(Fo^2^)+(0.0467P)^2^+0.0000P] where P=(Fo^2^+2Fc^2^)/3'
_atom_sites_solution_primary      direct
_atom_sites_solution_secondary    difmap
_atom_sites_solution_hydrogens    mixed
_refine_ls_hydrogen_treatment     mixed
_refine_ls_extinction_method      none
_refine_ls_extinction_coef        ?
_refine_ls_number_reflns          4636
_refine_ls_number_parameters      247
_refine_ls_number_restraints      46
_refine_ls_R_factor_all           0.0504
_refine_ls_R_factor_gt            0.0328
_refine_ls_wR_factor_ref          0.0814
_refine_ls_wR_factor_gt           0.0779
_refine_ls_goodness_of_fit_ref    0.923
_refine_ls_restrained_S_all       0.919
_refine_ls_shift/su_max           0.001
_refine_ls_shift/su_mean          0.000

loop_
 _atom_site_label
 _atom_site_type_symbol
 _atom_site_fract_x
 _atom_site_fract_y
 _atom_site_fract_z
 _atom_site_U_iso_or_equiv
 _atom_site_adp_type
 _atom_site_occupancy
 _atom_site_symmetry_multiplicity
 _atom_site_calc_flag
 _atom_site_refinement_flags
 _atom_site_disorder_assembly
 _atom_site_disorder_group
K K 0.28099(5) -0.07457(4) 0.52877(3) 0.02974(12) Uani 1 1 d . . .
P P 0.15009(5) 0.25037(4) 0.30595(3) 0.01588(11) Uani 1 1 d . . .
Si1 Si 0.32036(6) 0.36639(5) 0.12598(4) 0.02470(13) Uani 1 1 d . . .
Si2 Si 0.19693(6) 0.08351(5) 0.14254(4) 0.02464(13) Uani 1 1 d . . .
B1 B 0.0047(2) 0.1402(2) 0.36291(14) 0.0225(4) Uani 1 1 d . . .
H1A H -0.001(2) 0.160(2) 0.4358(14) 0.033(5) Uiso 1 1 d . . .
H1B H 0.061(2) 0.020(2) 0.3702(14) 0.036(5) Uiso 1 1 d . . .
H1C H -0.116(2) 0.1871(19) 0.3239(13) 0.026(5) Uiso 1 1 d . . .
B2 B 0.3640(2) 0.1802(2) 0.37686(15) 0.0226(4) Uani 1 1 d . . .
H2A H 0.427(2) 0.062(2) 0.3747(14) 0.033(5) Uiso 1 1 d . . .
H2B H 0.335(2) 0.1861(19) 0.4526(14) 0.029(5) Uiso 1 1 d . . .
H2C H 0.439(3) 0.250(2) 0.3497(15) 0.043(6) Uiso 1 1 d . . .
C1 C 0.17224(19) 0.26381(17) 0.17943(11) 0.0175(3) Uani 1 1 d . . .
H1 H 0.0606 0.3320 0.1497 0.021 Uiso 1 1 calc R . .
C2 C 0.2527(3) 0.4528(3) -0.00141(15) 0.0483(6) Uani 1 1 d . . .
H2D H 0.3393 0.4891 -0.0330 0.072 Uiso 1 1 calc R . .
H2E H 0.1488 0.5368 -0.0073 0.072 Uiso 1 1 calc R . .
H2F H 0.2346 0.3778 -0.0306 0.072 Uiso 1 1 calc R . .
C3 C 0.3186(3) 0.5278(2) 0.17491(15) 0.0376(5) Uani 1 1 d . . .
H3A H 0.3942 0.5769 0.1413 0.056 Uiso 1 1 calc R . .
H3B H 0.3552 0.4915 0.2419 0.056 Uiso 1 1 calc R . .
H3C H 0.2054 0.5996 0.1672 0.056 Uiso 1 1 calc R . .
C4 C 0.5387(2) 0.2356(2) 0.13908(17) 0.0409(5) Uani 1 1 d . . .
H4A H 0.6127 0.2905 0.1103 0.061 Uiso 1 1 calc R . .
H4B H 0.5449 0.1556 0.1078 0.061 Uiso 1 1 calc R . .
H4C H 0.5731 0.1921 0.2060 0.061 Uiso 1 1 calc R . .
C5 C 0.3552(3) -0.0802(2) 0.22031(18) 0.0489(6) Uani 1 1 d . . .
H5A H 0.3697 -0.1694 0.1966 0.073 Uiso 1 1 calc R . .
H5B H 0.3178 -0.0967 0.2842 0.073 Uiso 1 1 calc R . .
H5C H 0.4616 -0.0610 0.2211 0.073 Uiso 1 1 calc R . .
C6 C 0.2589(3) 0.0955(3) 0.01879(16) 0.0471(6) Uani 1 1 d . . .
H6A H 0.2680 0.0016 0.0020 0.071 Uiso 1 1 calc R . .
H6B H 0.3667 0.1125 0.0134 0.071 Uiso 1 1 calc R . .
H6C H 0.1745 0.1785 -0.0239 0.071 Uiso 1 1 calc R . .
C7 C -0.0057(3) 0.0489(2) 0.14239(16) 0.0395(5) Uani 1 1 d . . .
H7A H 0.0096 -0.0458 0.1253 0.059 Uiso 1 1 calc R . .
H7B H -0.0858 0.1308 0.0966 0.059 Uiso 1 1 calc R . .
H7C H -0.0479 0.0436 0.2052 0.059 Uiso 1 1 calc R . .
C8 C 0.0365(2) 0.44313(18) 0.31106(12) 0.0199(4) Uani 1 1 d . . .
C9 C 0.0861(3) 0.5087(2) 0.37424(15) 0.0389(5) Uani 1 1 d . . .
H9 H 0.1812 0.4533 0.4165 0.047 Uiso 1 1 calc R . .
C10 C -0.0020(3) 0.6550(2) 0.37656(19) 0.0567(7) Uani 1 1 d . . .
H10 H 0.0334 0.6990 0.4204 0.068 Uiso 1 1 calc R . .
C11 C -0.1391(3) 0.7363(2) 0.31640(17) 0.0473(6) Uani 1 1 d . . .
H11 H -0.1977 0.8369 0.3176 0.057 Uiso 1 1 calc R . .
C12 C -0.1916(3) 0.6719(2) 0.25430(15) 0.0418(5) Uani 1 1 d . . .
H12 H -0.2874 0.7278 0.2127 0.050 Uiso 1 1 calc R . .
C13 C -0.1054(2) 0.5256(2) 0.25213(13) 0.0309(4) Uani 1 1 d . . .
H13 H -0.1439 0.4811 0.2097 0.037 Uiso 1 1 calc R . .
O O 0.3805(4) -0.3491(4) 0.4845(3) 0.0389(8) Uani 0.50 1 d PDU A -1
C14 C 0.5182(9) -0.3908(8) 0.4319(5) 0.0363(17) Uani 0.50 1 d PDU A -1
H14A H 0.6041 -0.3489 0.4467 0.044 Uiso 0.50 1 calc PR A -1
H14B H 0.4845 -0.3526 0.3638 0.044 Uiso 0.50 1 calc PR A -1
C15 C 0.5857(13) -0.5582(10) 0.4571(8) 0.045(2) Uani 0.50 1 d PDU A -1
H15A H 0.7081 -0.5944 0.4537 0.055 Uiso 0.50 1 calc PR A -1
H15B H 0.5338 -0.6004 0.4153 0.055 Uiso 0.50 1 calc PR A -1
C16 C 0.5378(11) -0.5982(10) 0.5568(7) 0.058(3) Uani 0.50 1 d PDU A -1
H16A H 0.6276 -0.6069 0.6025 0.070 Uiso 0.50 1 calc PR A -1
H16B H 0.5130 -0.6935 0.5703 0.070 Uiso 0.50 1 calc PR A -1
C17 C 0.3834(12) -0.4681(11) 0.5603(7) 0.036(2) Uani 0.50 1 d PDU A -1
H17A H 0.2824 -0.4967 0.5559 0.044 Uiso 0.50 1 calc PR A -1
H17B H 0.3864 -0.4387 0.6203 0.044 Uiso 0.50 1 calc PR A -1

loop_
 _atom_site_aniso_label
 _atom_site_aniso_U_11
 _atom_site_aniso_U_22
 _atom_site_aniso_U_33
 _atom_site_aniso_U_23
 _atom_site_aniso_U_13
 _atom_site_aniso_U_12
K 0.0189(2) 0.0339(2) 0.0301(2) 0.00771(18) -0.00416(16) -0.01095(16)
P 0.0146(2) 0.0168(2) 0.0143(2) -0.00106(17) -0.00135(16) -0.00430(16)
Si1 0.0220(3) 0.0296(3) 0.0218(3) -0.0030(2) 0.0052(2) -0.0100(2)
Si2 0.0194(3) 0.0259(3) 0.0293(3) -0.0136(2) -0.0016(2) -0.00332(19)
B1 0.0191(10) 0.0282(11) 0.0203(11) -0.0011(9) 0.0003(8) -0.0112(8)
B2 0.0200(10) 0.0243(11) 0.0211(11) 0.0016(9) -0.0067(8) -0.0088(8)
C1 0.0149(8) 0.0187(8) 0.0159(9) -0.0027(7) -0.0010(6) -0.0023(6)
C2 0.0515(14) 0.0646(15) 0.0276(12) 0.0045(11) 0.0059(10) -0.0288(12)
C3 0.0435(12) 0.0320(11) 0.0410(12) -0.0034(9) 0.0087(10) -0.0216(9)
C4 0.0245(10) 0.0476(12) 0.0535(14) -0.0154(11) 0.0101(10) -0.0135(9)
C5 0.0450(13) 0.0247(10) 0.0702(17) -0.0215(11) -0.0194(12) 0.0061(9)
C6 0.0426(13) 0.0677(15) 0.0458(14) -0.0377(12) 0.0148(10) -0.0212(11)
C7 0.0368(12) 0.0496(13) 0.0434(13) -0.0222(11) 0.0028(10) -0.0218(10)
C8 0.0221(9) 0.0186(8) 0.0170(9) -0.0028(7) 0.0048(7) -0.0050(7)
C9 0.0416(12) 0.0307(11) 0.0411(13) -0.0157(10) -0.0123(10) -0.0020(9)
C10 0.0706(17) 0.0355(13) 0.0649(17) -0.0305(12) -0.0119(14) -0.0047(12)
C11 0.0570(15) 0.0228(10) 0.0516(15) -0.0103(10) 0.0082(12) 0.0021(10)
C12 0.0400(12) 0.0348(11) 0.0293(11) -0.0028(9) 0.0026(9) 0.0132(9)
C13 0.0306(10) 0.0310(10) 0.0230(10) -0.0081(8) -0.0007(8) 0.0019(8)
O 0.042(2) 0.0323(18) 0.038(2) -0.0054(16) 0.0078(16) -0.0086(15)
C14 0.049(5) 0.029(3) 0.032(3) -0.008(2) 0.011(3) -0.015(3)
C15 0.037(4) 0.042(5) 0.070(7) -0.034(5) 0.005(4) -0.016(3)
C16 0.048(5) 0.042(4) 0.074(5) 0.021(3) -0.009(4) -0.024(4)
C17 0.046(5) 0.044(4) 0.027(3) -0.007(2) 0.001(3) -0.027(3)

_geom_special_details
;
 All esds (except the esd in the dihedral angle between two l.s. planes)
 are estimated using the full covariance matrix.  The cell esds are taken
 into account individually in the estimation of esds in distances, angles
 and torsion angles; correlations between esds in cell parameters are only
 used when they are defined by crystal symmetry.  An approximate (isotropic)
 treatment of cell esds is used for estimating esds involving l.s. planes.
;

loop_
 _geom_bond_atom_site_label_1
 _geom_bond_atom_site_label_2
 _geom_bond_distance
 _geom_bond_site_symmetry_2
 _geom_bond_publ_flag
K H1A 2.813(18) . ?
K H1A 2.766(18) 2_556 ?
K H1B 2.78(2) . ?
K H1B 3.191(19) 2_556 ?
K H1C 2.762(18) 2_556 ?
K H2A 2.822(19) . ?
K H2A 2.924(18) 2_656 ?
K H2B 2.698(18) . ?
K H2B 3.084(18) 2_656 ?
K H2C 2.79(2) 2_656 ?
K O 2.762(3) . ?
P B1 1.941(2) . ?
P B2 1.940(2) . ?
P C1 1.8410(16) . ?
P C8 1.8326(16) . ?
Si1 C1 1.8978(16) . ?
Si1 C2 1.872(2) . ?
Si1 C3 1.870(2) . ?
Si1 C4 1.864(2) . ?
Si2 C1 1.9030(16) . ?
Si2 C5 1.859(2) . ?
Si2 C6 1.871(2) . ?
Si2 C7 1.856(2) . ?
B1 H1A 1.128(19) . ?
B1 H1B 1.093(19) . ?
B1 H1C 1.085(18) . ?
B2 H2A 1.114(18) . ?
B2 H2B 1.146(19) . ?
B2 H2C 1.08(2) . ?
C1 H1 1.000 . ?
C2 H2D 0.980 . ?
C2 H2E 0.980 . ?
C2 H2F 0.980 . ?
C3 H3A 0.980 . ?
C3 H3B 0.980 . ?
C3 H3C 0.980 . ?
C4 H4A 0.980 . ?
C4 H4B 0.980 . ?
C4 H4C 0.980 . ?
C5 H5A 0.980 . ?
C5 H5B 0.980 . ?
C5 H5C 0.980 . ?
C6 H6A 0.980 . ?
C6 H6B 0.980 . ?
C6 H6C 0.980 . ?
C7 H7A 0.980 . ?
C7 H7B 0.980 . ?
C7 H7C 0.980 . ?
C8 C9 1.380(3) . ?
C8 C13 1.386(2) . ?
C9 H9 0.950 . ?
C9 C10 1.388(3) . ?
C10 H10 0.950 . ?
C10 C11 1.366(3) . ?
C11 H11 0.950 . ?
C11 C12 1.370(3) . ?
C12 H12 0.950 . ?
C12 C13 1.384(3) . ?
C13 H13 0.950 . ?
O C14 1.396(7) . ?
O C17 1.397(8) . ?
C14 H14A 0.990 . ?
C14 H14B 0.990 . ?
C14 C15 1.498(9) . ?
C15 H15A 0.990 . ?
C15 H15B 0.990 . ?
C15 C16 1.509(10) . ?
C16 H16A 0.990 . ?
C16 H16B 0.990 . ?
C16 C17 1.513(10) . ?
C17 H17A 0.990 . ?
C17 H17B 0.990 . ?

loop_
 _geom_angle_atom_site_label_1
 _geom_angle_atom_site_label_2
 _geom_angle_atom_site_label_3
 _geom_angle
 _geom_angle_site_symmetry_1
 _geom_angle_site_symmetry_3
 _geom_angle_publ_flag
H1A K H1A 70.8(6) . 2_556 ?
H1A K H1B 37.3(5) . . ?
H1A K H1B 34.1(5) 2_556 2_556 ?
H1A K H1B 61.8(5) . 2_556 ?
H1A K H1B 67.9(6) 2_556 . ?
H1A K H1C 38.9(5) 2_556 2_556 ?
H1A K H1C 95.9(6) . 2_556 ?
H1A K H2A 79.6(5) . . ?
H1A K H2A 141.3(6) 2_556 2_656 ?
H1A K H2A 129.5(5) . 2_656 ?
H1A K H2A 138.9(6) 2_556 . ?
H1A K H2B 64.9(5) . . ?
H1A K H2B 144.3(5) 2_556 2_656 ?
H1A K H2B 143.9(5) . 2_656 ?
H1A K H2B 134.8(5) 2_556 . ?
H1A K H2C 114.7(6) 2_556 2_656 ?
H1A K H2C 164.0(6) . 2_656 ?
H1A K O 121.5(4) . . ?
H1A K O 78.6(4) 2_556 . ?
H1B K H1B 81.1(6) . 2_556 ?
H1B K H1C 34.6(5) 2_556 2_556 ?
H1B K H1C 106.0(5) . 2_556 ?
H1B K H2A 71.2(5) . . ?
H1B K H2A 118.9(5) 2_556 2_656 ?
H1B K H2A 149.7(5) . 2_656 ?
H1B K H2A 140.8(5) 2_556 . ?
H1B K H2B 81.8(6) . . ?
H1B K H2B 148.3(5) 2_556 2_656 ?
H1B K H2B 130.4(5) . 2_656 ?
H1B K H2B 111.2(5) 2_556 . ?
H1B K H2C 113.6(6) 2_556 2_656 ?
H1B K H2C 158.2(6) . 2_656 ?
H1B K O 85.2(4) . . ?
H1B K O 111.2(4) 2_556 . ?
H1C K H2A 102.4(5) 2_556 2_656 ?
H1C K H2A 175.4(5) 2_556 . ?
H1C K H2B 117.9(5) 2_556 2_656 ?
H1C K H2B 137.8(5) 2_556 . ?
H1C K H2C 82.3(6) 2_556 2_656 ?
H1C K O 89.4(4) 2_556 . ?
H2A K H2A 79.8(6) . 2_656 ?
H2A K H2B 39.0(5) . . ?
H2A K H2B 35.7(5) 2_656 2_656 ?
H2A K H2B 66.2(5) . 2_656 ?
H2A K H2B 70.0(6) 2_656 . ?
H2A K H2C 37.1(5) 2_656 2_656 ?
H2A K H2C 101.7(6) . 2_656 ?
H2A K O 93.9(4) . . ?
H2A K O 105.5(4) 2_656 . ?
H2B K H2B 80.8(5) . 2_656 ?
H2B K H2C 35.8(5) 2_656 2_656 ?
H2B K H2C 105.9(6) . 2_656 ?
H2B K O 132.8(4) . . ?
H2B K O 73.9(3) 2_656 . ?
H2C K O 74.5(4) 2_656 . ?
B1 P B2 111.63(9) . . ?
B1 P C1 115.07(8) . . ?
B1 P C8 103.43(8) . . ?
B2 P C1 112.23(8) . . ?
B2 P C8 110.00(8) . . ?
C1 P C8 103.69(7) . . ?
C1 Si1 C2 108.35(9) . . ?
C1 Si1 C3 115.04(8) . . ?
C1 Si1 C4 110.80(8) . . ?
C2 Si1 C3 104.20(10) . . ?
C2 Si1 C4 110.22(11) . . ?
C3 Si1 C4 108.00(10) . . ?
C1 Si2 C5 111.95(8) . . ?
C1 Si2 C6 111.90(9) . . ?
C1 Si2 C7 110.36(8) . . ?
C5 Si2 C6 108.03(11) . . ?
C5 Si2 C7 109.66(11) . . ?
C6 Si2 C7 104.66(10) . . ?
P B1 H1A 101.5(9) . . ?
P B1 H1B 112.1(10) . . ?
P B1 H1C 109.4(9) . . ?
H1A B1 H1B 107.5(14) . . ?
H1A B1 H1C 112.6(13) . . ?
H1B B1 H1C 113.1(14) . . ?
P B2 H2A 107.9(10) . . ?
P B2 H2B 106.0(9) . . ?
P B2 H2C 111.5(11) . . ?
H2A B2 H2B 109.6(14) . . ?
H2A B2 H2C 111.9(14) . . ?
H2B B2 H2C 109.8(14) . . ?
P C1 Si1 114.40(8) . . ?
P C1 Si2 114.66(8) . . ?
P C1 H1 103.6 . . ?
Si1 C1 Si2 114.79(8) . . ?
Si1 C1 H1 103.6 . . ?
Si2 C1 H1 103.6 . . ?
Si1 C2 H2D 109.5 . . ?
Si1 C2 H2E 109.5 . . ?
Si1 C2 H2F 109.5 . . ?
H2D C2 H2E 109.5 . . ?
H2D C2 H2F 109.5 . . ?
H2E C2 H2F 109.5 . . ?
Si1 C3 H3A 109.5 . . ?
Si1 C3 H3B 109.5 . . ?
Si1 C3 H3C 109.5 . . ?
H3A C3 H3B 109.5 . . ?
H3A C3 H3C 109.5 . . ?
H3B C3 H3C 109.5 . . ?
Si1 C4 H4A 109.5 . . ?
Si1 C4 H4B 109.5 . . ?
Si1 C4 H4C 109.5 . . ?
H4A C4 H4B 109.5 . . ?
H4A C4 H4C 109.5 . . ?
H4B C4 H4C 109.5 . . ?
Si2 C5 H5A 109.5 . . ?
Si2 C5 H5B 109.5 . . ?
Si2 C5 H5C 109.5 . . ?
H5A C5 H5B 109.5 . . ?
H5A C5 H5C 109.5 . . ?
H5B C5 H5C 109.5 . . ?
Si2 C6 H6A 109.5 . . ?
Si2 C6 H6B 109.5 . . ?
Si2 C6 H6C 109.5 . . ?
H6A C6 H6B 109.5 . . ?
H6A C6 H6C 109.5 . . ?
H6B C6 H6C 109.5 . . ?
Si2 C7 H7A 109.5 . . ?
Si2 C7 H7B 109.5 . . ?
Si2 C7 H7C 109.5 . . ?
H7A C7 H7B 109.5 . . ?
H7A C7 H7C 109.5 . . ?
H7B C7 H7C 109.5 . . ?
P C8 C9 121.61(13) . . ?
P C8 C13 120.04(13) . . ?
C9 C8 C13 118.33(16) . . ?
C8 C9 H9 119.8 . . ?
C8 C9 C10 120.47(19) . . ?
H9 C9 C10 119.8 . . ?
C9 C10 H10 119.7 . . ?
C9 C10 C11 120.5(2) . . ?
H10 C10 C11 119.7 . . ?
C10 C11 H11 120.2 . . ?
C10 C11 C12 119.69(18) . . ?
H11 C11 C12 120.2 . . ?
C11 C12 H12 119.9 . . ?
C11 C12 C13 120.13(19) . . ?
H12 C12 C13 119.9 . . ?
C8 C13 C12 120.80(18) . . ?
C8 C13 H13 119.6 . . ?
C12 C13 H13 119.6 . . ?
K O C14 121.1(3) . . ?
K O C17 113.6(5) . . ?
C14 O C17 110.3(6) . . ?
O C14 H14A 110.3 . . ?
O C14 H14B 110.3 . . ?
O C14 C15 107.3(6) . . ?
H14A C14 H14B 108.5 . . ?
H14A C14 C15 110.3 . . ?
H14B C14 C15 110.3 . . ?
C14 C15 H15A 111.2 . . ?
C14 C15 H15B 111.2 . . ?
C14 C15 C16 102.7(6) . . ?
H15A C15 H15B 109.1 . . ?
H15A C15 C16 111.2 . . ?
H15B C15 C16 111.2 . . ?
C15 C16 H16A 111.1 . . ?
C15 C16 H16B 111.1 . . ?
C15 C16 C17 103.2(6) . . ?
H16A C16 H16B 109.1 . . ?
H16A C16 C17 111.1 . . ?
H16B C16 C17 111.1 . . ?
O C17 C16 107.8(6) . . ?
O C17 H17A 110.2 . . ?
O C17 H17B 110.2 . . ?
C16 C17 H17A 110.2 . . ?
C16 C17 H17B 110.2 . . ?
H17A C17 H17B 108.5 . . ?

_diffrn_measured_fraction_theta_max    0.823
_diffrn_reflns_theta_full              26.00
_diffrn_measured_fraction_theta_full   0.977
_refine_diff_density_max    0.368
_refine_diff_density_min   -0.448
_refine_diff_density_rms    0.049

#===END

data_ki437_compound_18b

_audit_creation_method            SHELXL-97
_chemical_name_systematic
;
 ?
;
_chemical_name_common             ?
_chemical_melting_point           ?
_chemical_formula_moiety          'C21 H46 B2 K O2 P Si2'
_chemical_formula_sum             'C21 H46 B2 K O2 P Si2'
_chemical_formula_weight          478.45

loop_
 _atom_type_symbol
 _atom_type_description
 _atom_type_scat_dispersion_real
 _atom_type_scat_dispersion_imag
 _atom_type_scat_source
 'C'  'C'   0.0033   0.0016
 'International Tables Vol C Tables 4.2.6.8 and 6.1.1.4'
 'H'  'H'   0.0000   0.0000
 'International Tables Vol C Tables 4.2.6.8 and 6.1.1.4'
 'B'  'B'   0.0013   0.0007
 'International Tables Vol C Tables 4.2.6.8 and 6.1.1.4'
 'Si'  'Si'   0.0817   0.0704
 'International Tables Vol C Tables 4.2.6.8 and 6.1.1.4'
 'P'  'P'   0.1023   0.0942
 'International Tables Vol C Tables 4.2.6.8 and 6.1.1.4'
 'O'  'O'   0.0106   0.0060
 'International Tables Vol C Tables 4.2.6.8 and 6.1.1.4'
 'K'  'K'   0.2009   0.2494
 'International Tables Vol C Tables 4.2.6.8 and 6.1.1.4'

_symmetry_cell_setting            orthorhombic
_symmetry_space_group_name_H-M    'P c c n'

loop_
 _symmetry_equiv_pos_as_xyz
 'x, y, z'
 '-x+1/2, -y+1/2, z'
 '-x, y+1/2, -z+1/2'
 'x+1/2, -y, -z+1/2'
 '-x, -y, -z'
 'x-1/2, y-1/2, -z'
 'x, -y-1/2, z-1/2'
 '-x-1/2, y, z-1/2'

_cell_length_a                    8.6961(3)
_cell_length_b                    30.2919(11)
_cell_length_c                    23.9712(9)
_cell_angle_alpha                 90.00
_cell_angle_beta                  90.00
_cell_angle_gamma                 90.00
_cell_volume                      6314.5(4)
_cell_formula_units_Z             8
_cell_measurement_temperature     150(2)
_cell_measurement_reflns_used     10088
_cell_measurement_theta_min       2.97
_cell_measurement_theta_max       29.60

_exptl_crystal_description        rod
_exptl_crystal_colour             colourless
_exptl_crystal_size_max           0.25
_exptl_crystal_size_mid           0.20
_exptl_crystal_size_min           0.20
_exptl_crystal_density_meas       ?
_exptl_crystal_density_diffrn     1.007
_exptl_crystal_density_method     'not measured'
_exptl_crystal_F_000              2080
_exptl_absorpt_coefficient_mu     0.308
_exptl_absorpt_correction_type    multi-scan
_exptl_absorpt_correction_T_min   0.927
_exptl_absorpt_correction_T_max   0.941
_exptl_absorpt_process_details
;
CrysAlisPro, Oxford Diffraction Ltd.,
Version 1.171.33.55 (release 05-01-2010 CrysAlis171 .NET)
(compiled Jan  5 2010,16:28:46)
;

_exptl_special_details
;
 ?
;

_diffrn_ambient_temperature       150(2)
_diffrn_radiation_wavelength      0.71073
_diffrn_radiation_type            MoK\a
_diffrn_radiation_source          'sealed tube with Enhance optics'
_diffrn_radiation_monochromator   none
_diffrn_measurement_device_type
'Oxford Diffraction Gemini A Ultra diffractometer'
_diffrn_measurement_method        '\w scans'
_diffrn_detector_area_resol_mean  10.3968
_diffrn_reflns_number             34085
_diffrn_reflns_av_R_equivalents   0.0546
_diffrn_reflns_av_sigmaI/netI     0.0581
_diffrn_reflns_limit_h_min        -10
_diffrn_reflns_limit_h_max        10
_diffrn_reflns_limit_k_min        -35
_diffrn_reflns_limit_k_max        36
_diffrn_reflns_limit_l_min        -24
_diffrn_reflns_limit_l_max        28
_diffrn_reflns_theta_min          3.21
_diffrn_reflns_theta_max          25.00
_reflns_number_total              5552
_reflns_number_gt                 3579
_reflns_threshold_expression      I>2\s(I)

_computing_data_collection
;
CrysAlisPro, Oxford Diffraction Ltd.,
Version 1.171.33.55 (release 05-01-2010 CrysAlis171 .NET)
(compiled Jan  5 2010,16:28:46)
;
_computing_cell_refinement
;
CrysAlisPro, Oxford Diffraction Ltd.,
Version 1.171.33.55 (release 05-01-2010 CrysAlis171 .NET)
(compiled Jan  5 2010,16:28:46)
;
_computing_data_reduction
;
CrysAlisPro, Oxford Diffraction Ltd.,
Version 1.171.33.55 (release 05-01-2010 CrysAlis171 .NET)
(compiled Jan  5 2010,16:28:46)
;
_computing_structure_solution     'Bruker SHELXTL'
_computing_structure_refinement   'Bruker SHELXTL'
_computing_molecular_graphics     'Bruker SHELXTL'
_computing_publication_material   'Bruker SHELXTL and local programs'

_refine_special_details
;
 Refinement of F^2^ against ALL reflections.  The weighted R-factor wR and
 goodness of fit S are based on F^2^, conventional R-factors R are based
 on F, with F set to zero for negative F^2^. The threshold expression of
 F^2^ > 2sigma(F^2^) is used only for calculating R-factors(gt) etc. and is
 not relevant to the choice of reflections for refinement.  R-factors based
 on F^2^ are statistically about twice as large as those based on F, and R-
 factors based on ALL data will be even larger.
;

_refine_ls_structure_factor_coef  Fsqd
_refine_ls_matrix_type            full
_refine_ls_weighting_scheme       calc
_refine_ls_weighting_details
 'calc w=1/[\s^2^(Fo^2^)+(0.0814P)^2^+0.0000P] where P=(Fo^2^+2Fc^2^)/3'
_atom_sites_solution_primary      direct
_atom_sites_solution_secondary    difmap
_atom_sites_solution_hydrogens    mixed
_refine_ls_hydrogen_treatment     mixed
_refine_ls_extinction_method      none
_refine_ls_extinction_coef        ?
_refine_ls_number_reflns          5552
_refine_ls_number_parameters      292
_refine_ls_number_restraints      0
_refine_ls_R_factor_all           0.0802
_refine_ls_R_factor_gt            0.0512
_refine_ls_wR_factor_ref          0.1397
_refine_ls_wR_factor_gt           0.1327
_refine_ls_goodness_of_fit_ref    0.987
_refine_ls_restrained_S_all       0.987
_refine_ls_shift/su_max           0.001
_refine_ls_shift/su_mean          0.000

loop_
 _atom_site_label
 _atom_site_type_symbol
 _atom_site_fract_x
 _atom_site_fract_y
 _atom_site_fract_z
 _atom_site_U_iso_or_equiv
 _atom_site_adp_type
 _atom_site_occupancy
 _atom_site_symmetry_multiplicity
 _atom_site_calc_flag
 _atom_site_refinement_flags
 _atom_site_disorder_assembly
 _atom_site_disorder_group
P P 0.31141(9) 0.60684(2) 0.27420(3) 0.0248(2) Uani 1 1 d . . .
B1 B 0.4908(4) 0.57148(11) 0.25786(16) 0.0313(8) Uani 1 1 d . . .
H1A H 0.505(3) 0.5497(9) 0.2952(11) 0.025(7) Uiso 1 1 d . . .
H1B H 0.467(3) 0.5526(9) 0.2198(12) 0.033(8) Uiso 1 1 d . . .
H1C H 0.592(4) 0.5913(10) 0.2489(13) 0.044(9) Uiso 1 1 d . . .
B2 B 0.1302(4) 0.57012(12) 0.28582(16) 0.0304(8) Uani 1 1 d . . .
H2A H 0.123(4) 0.5538(11) 0.2449(14) 0.047(9) Uiso 1 1 d . . .
H2B H 0.149(3) 0.5447(8) 0.3220(11) 0.020(7) Uiso 1 1 d . . .
H2C H 0.028(4) 0.5926(10) 0.2963(12) 0.039(8) Uiso 1 1 d . . .
Si1 Si 0.31776(11) 0.62729(3) 0.40276(4) 0.0385(3) Uani 1 1 d . . .
Si2 Si 0.52860(11) 0.68214(3) 0.31895(4) 0.0367(3) Uani 1 1 d . . .
C1 C 0.3475(3) 0.64852(9) 0.32916(12) 0.0285(7) Uani 1 1 d . . .
H1 H 0.2627 0.6705 0.3240 0.034 Uiso 1 1 calc R . .
C2 C 0.1087(5) 0.62322(14) 0.41725(16) 0.0619(11) Uani 1 1 d . . .
H2D H 0.0930 0.6114 0.4549 0.093 Uiso 1 1 calc R . .
H2E H 0.0606 0.6036 0.3899 0.093 Uiso 1 1 calc R . .
H2F H 0.0621 0.6526 0.4147 0.093 Uiso 1 1 calc R . .
C3 C 0.3901(5) 0.66685(13) 0.45677(15) 0.0561(10) Uani 1 1 d . . .
H3A H 0.3774 0.6539 0.4939 0.084 Uiso 1 1 calc R . .
H3B H 0.3315 0.6944 0.4546 0.084 Uiso 1 1 calc R . .
H3C H 0.4992 0.6730 0.4501 0.084 Uiso 1 1 calc R . .
C4 C 0.4161(5) 0.57343(12) 0.41411(15) 0.0553(10) Uani 1 1 d . . .
H4A H 0.4063 0.5648 0.4534 0.083 Uiso 1 1 calc R . .
H4B H 0.5252 0.5763 0.4045 0.083 Uiso 1 1 calc R . .
H4C H 0.3686 0.5509 0.3904 0.083 Uiso 1 1 calc R . .
C5 C 0.5781(4) 0.69422(12) 0.24482(15) 0.0502(10) Uani 1 1 d . . .
H5A H 0.6715 0.7123 0.2434 0.075 Uiso 1 1 calc R . .
H5B H 0.4931 0.7103 0.2272 0.075 Uiso 1 1 calc R . .
H5C H 0.5957 0.6665 0.2248 0.075 Uiso 1 1 calc R . .
C6 C 0.4952(5) 0.73792(11) 0.34948(18) 0.0567(10) Uani 1 1 d . . .
H6A H 0.5894 0.7555 0.3465 0.085 Uiso 1 1 calc R . .
H6B H 0.4666 0.7349 0.3888 0.085 Uiso 1 1 calc R . .
H6C H 0.4119 0.7527 0.3292 0.085 Uiso 1 1 calc R . .
C7 C 0.6981(4) 0.65527(13) 0.35202(17) 0.0512(10) Uani 1 1 d . . .
H7A H 0.7923 0.6701 0.3397 0.077 Uiso 1 1 calc R . .
H7B H 0.7018 0.6241 0.3411 0.077 Uiso 1 1 calc R . .
H7C H 0.6894 0.6574 0.3927 0.077 Uiso 1 1 calc R . .
C8 C 0.2628(4) 0.64034(9) 0.21271(13) 0.0304(7) Uani 1 1 d . . .
C9 C 0.1539(4) 0.67367(10) 0.21614(15) 0.0431(9) Uani 1 1 d . . .
H9 H 0.1063 0.6800 0.2509 0.052 Uiso 1 1 calc R . .
C10 C 0.1142(5) 0.69771(11) 0.16953(16) 0.0555(11) Uani 1 1 d . . .
H10 H 0.0402 0.7206 0.1726 0.067 Uiso 1 1 calc R . .
C11 C 0.1803(5) 0.68893(11) 0.11887(17) 0.0562(11) Uani 1 1 d . . .
H11 H 0.1539 0.7059 0.0870 0.067 Uiso 1 1 calc R . .
C12 C 0.2848(5) 0.65531(12) 0.11490(16) 0.0522(10) Uani 1 1 d . . .
H12 H 0.3279 0.6481 0.0797 0.063 Uiso 1 1 calc R . .
C13 C 0.3276(4) 0.63198(11) 0.16146(13) 0.0377(8) Uani 1 1 d . . .
H13 H 0.4036 0.6096 0.1582 0.045 Uiso 1 1 calc R . .
K K 0.31175(7) 0.47536(2) 0.24551(3) 0.02870(19) Uani 1 1 d . . .
O1 O 0.3210(3) 0.43890(7) 0.34959(9) 0.0419(6) Uani 1 1 d . . .
C14 C 0.3739(5) 0.39455(11) 0.35486(15) 0.0495(9) Uani 1 1 d . . .
H14A H 0.4866 0.3930 0.3494 0.059 Uiso 1 1 calc R . .
H14B H 0.3235 0.3753 0.3269 0.059 Uiso 1 1 calc R . .
C15 C 0.3321(7) 0.38065(17) 0.4123(2) 0.107(2) Uani 1 1 d . . .
H15A H 0.2976 0.3495 0.4124 0.128 Uiso 1 1 calc R . .
H15B H 0.4220 0.3834 0.4374 0.128 Uiso 1 1 calc R . .
C16 C 0.2138(6) 0.40819(16) 0.43014(19) 0.0825(15) Uani 1 1 d . . .
H16A H 0.2311 0.4173 0.4693 0.099 Uiso 1 1 calc R . .
H16B H 0.1139 0.3926 0.4279 0.099 Uiso 1 1 calc R . .
C17 C 0.2132(5) 0.44797(12) 0.39237(15) 0.0495(10) Uani 1 1 d . . .
H17A H 0.1095 0.4527 0.3764 0.059 Uiso 1 1 calc R . .
H17B H 0.2435 0.4748 0.4133 0.059 Uiso 1 1 calc R . .
O2 O 0.2825(3) 0.48955(9) 0.13331(9) 0.0528(7) Uani 1 1 d . . .
C18 C 0.1710(4) 0.52244(11) 0.12204(14) 0.0456(9) Uani 1 1 d . . .
H18A H 0.1917 0.5492 0.1445 0.055 Uiso 1 1 calc R . .
H18B H 0.0668 0.5115 0.1313 0.055 Uiso 1 1 calc R . .
C19 C 0.1821(6) 0.53270(16) 0.06119(16) 0.0755(15) Uani 1 1 d . . .
H19A H 0.0935 0.5200 0.0408 0.091 Uiso 1 1 calc R . .
H19B H 0.1836 0.5650 0.0551 0.091 Uiso 1 1 calc R . .
C20 C 0.3199(6) 0.51362(18) 0.04274(17) 0.0799(15) Uani 1 1 d . . .
H20A H 0.4034 0.5358 0.0422 0.096 Uiso 1 1 calc R . .
H20B H 0.3075 0.5014 0.0047 0.096 Uiso 1 1 calc R . .
C21 C 0.3563(4) 0.47721(13) 0.08390(15) 0.0497(9) Uani 1 1 d . . .
H21A H 0.3168 0.4485 0.0703 0.060 Uiso 1 1 calc R . .
H21B H 0.4687 0.4747 0.0897 0.060 Uiso 1 1 calc R . .

loop_
 _atom_site_aniso_label
 _atom_site_aniso_U_11
 _atom_site_aniso_U_22
 _atom_site_aniso_U_33
 _atom_site_aniso_U_23
 _atom_site_aniso_U_13
 _atom_site_aniso_U_12
P 0.0258(4) 0.0205(4) 0.0280(4) 0.0010(3) -0.0008(3) -0.0001(3)
B1 0.029(2) 0.0239(18) 0.041(2) 0.0025(17) 0.0047(17) 0.0034(15)
B2 0.0269(19) 0.0287(19) 0.036(2) -0.0081(17) 0.0010(16) -0.0035(15)
Si1 0.0480(6) 0.0377(5) 0.0299(5) -0.0026(4) 0.0014(4) -0.0089(4)
Si2 0.0369(5) 0.0280(5) 0.0453(6) 0.0042(4) -0.0073(4) -0.0091(4)
C1 0.0294(18) 0.0225(15) 0.0337(18) -0.0033(12) -0.0041(13) -0.0003(12)
C2 0.062(3) 0.075(3) 0.049(2) -0.018(2) 0.018(2) -0.025(2)
C3 0.069(3) 0.062(2) 0.037(2) -0.0083(18) -0.0019(19) -0.014(2)
C4 0.083(3) 0.052(2) 0.031(2) 0.0130(16) 0.0004(19) 0.004(2)
C5 0.051(2) 0.042(2) 0.058(2) 0.0138(17) -0.0014(18) -0.0188(18)
C6 0.064(3) 0.0345(19) 0.071(3) -0.0063(18) -0.006(2) -0.0149(18)
C7 0.034(2) 0.056(2) 0.063(2) 0.0058(19) -0.0105(18) -0.0106(17)
C8 0.0374(18) 0.0192(15) 0.0345(18) 0.0013(13) -0.0086(14) -0.0052(13)
C9 0.056(2) 0.0322(18) 0.041(2) -0.0066(15) -0.0170(17) 0.0104(16)
C10 0.082(3) 0.0294(19) 0.055(3) -0.0030(17) -0.031(2) 0.0154(19)
C11 0.090(3) 0.030(2) 0.048(2) 0.0099(17) -0.026(2) -0.004(2)
C12 0.068(3) 0.050(2) 0.039(2) 0.0066(17) -0.0097(19) -0.003(2)
C13 0.040(2) 0.0373(19) 0.0360(19) 0.0070(15) -0.0039(15) 0.0020(15)
K 0.0278(4) 0.0295(4) 0.0288(4) 0.0030(3) -0.0004(3) -0.0005(3)
O1 0.0455(14) 0.0444(14) 0.0357(13) 0.0052(11) 0.0046(11) 0.0049(11)
C14 0.054(2) 0.040(2) 0.054(2) -0.0023(17) 0.0026(19) 0.0024(17)
C15 0.144(6) 0.067(3) 0.109(4) 0.046(3) 0.060(4) 0.031(3)
C16 0.118(4) 0.077(3) 0.052(3) 0.021(2) 0.026(3) 0.013(3)
C17 0.060(3) 0.046(2) 0.043(2) 0.0002(17) 0.0096(18) 0.0020(18)
O2 0.0588(17) 0.0705(17) 0.0291(13) 0.0110(12) 0.0010(11) 0.0269(14)
C18 0.062(2) 0.043(2) 0.0313(18) -0.0017(15) 0.0080(17) 0.0136(18)
C19 0.109(4) 0.080(3) 0.037(2) 0.015(2) 0.012(2) 0.045(3)
C20 0.083(3) 0.116(4) 0.040(2) 0.023(2) 0.017(2) 0.045(3)
C21 0.045(2) 0.060(2) 0.045(2) -0.0030(18) 0.0008(17) 0.0127(18)

_geom_special_details
;
 All esds (except the esd in the dihedral angle between two l.s. planes)
 are estimated using the full covariance matrix.  The cell esds are taken
 into account individually in the estimation of esds in distances, angles
 and torsion angles; correlations between esds in cell parameters are only
 used when they are defined by crystal symmetry.  An approximate (isotropic)
 treatment of cell esds is used for estimating esds involving l.s. planes.
;

loop_
 _geom_bond_atom_site_label_1
 _geom_bond_atom_site_label_2
 _geom_bond_distance
 _geom_bond_site_symmetry_2
 _geom_bond_publ_flag
P B1 1.933(4) . ?
P B2 1.949(4) . ?
P C1 1.852(3) . ?
P C8 1.839(3) . ?
B1 H1A 1.12(3) . ?
B1 H1B 1.10(3) . ?
B1 H1C 1.08(3) . ?
B2 H2A 1.10(3) . ?
B2 H2B 1.17(3) . ?
B2 H2C 1.15(3) . ?
Si1 C1 1.896(3) . ?
Si1 C2 1.855(4) . ?
Si1 C3 1.873(4) . ?
Si1 C4 1.862(4) . ?
Si2 C1 1.892(3) . ?
Si2 C5 1.865(4) . ?
Si2 C6 1.864(3) . ?
Si2 C7 1.861(4) . ?
C1 H1 1.000 . ?
C2 H2D 0.980 . ?
C2 H2E 0.980 . ?
C2 H2F 0.980 . ?
C3 H3A 0.980 . ?
C3 H3B 0.980 . ?
C3 H3C 0.980 . ?
C4 H4A 0.980 . ?
C4 H4B 0.980 . ?
C4 H4C 0.980 . ?
C5 H5A 0.980 . ?
C5 H5B 0.980 . ?
C5 H5C 0.980 . ?
C6 H6A 0.980 . ?
C6 H6B 0.980 . ?
C6 H6C 0.980 . ?
C7 H7A 0.980 . ?
C7 H7B 0.980 . ?
C7 H7C 0.980 . ?
C8 C9 1.387(4) . ?
C8 C13 1.375(4) . ?
C9 H9 0.950 . ?
C9 C10 1.378(5) . ?
C10 H10 0.950 . ?
C10 C11 1.369(5) . ?
C11 H11 0.950 . ?
C11 C12 1.368(5) . ?
C12 H12 0.950 . ?
C12 C13 1.373(5) . ?
C13 H13 0.950 . ?
K H1A 3.05(3) . ?
K H1A 2.94(3) 4_465 ?
K H1B 2.77(3) . ?
K H1B 3.23(3) 4_465 ?
K H1C 2.79(3) 4_465 ?
K H2A 2.89(3) . ?
K H2A 2.86(3) 4_565 ?
K H2B 3.13(2) . ?
K H2B 3.40(3) 4_565 ?
K H2C 2.97(3) 4_565 ?
K O1 2.730(2) . ?
K O2 2.735(2) . ?
O1 C14 1.426(4) . ?
O1 C17 1.416(4) . ?
C14 H14A 0.990 . ?
C14 H14B 0.990 . ?
C14 C15 1.486(6) . ?
C15 H15A 0.990 . ?
C15 H15B 0.990 . ?
C15 C16 1.391(6) . ?
C16 H16A 0.990 . ?
C16 H16B 0.990 . ?
C16 C17 1.507(5) . ?
C17 H17A 0.990 . ?
C17 H17B 0.990 . ?
O2 C18 1.416(4) . ?
O2 C21 1.398(4) . ?
C18 H18A 0.990 . ?
C18 H18B 0.990 . ?
C18 C19 1.494(5) . ?
C19 H19A 0.990 . ?
C19 H19B 0.990 . ?
C19 C20 1.402(6) . ?
C20 H20A 0.990 . ?
C20 H20B 0.990 . ?
C20 C21 1.513(5) . ?
C21 H21A 0.990 . ?
C21 H21B 0.990 . ?

loop_
 _geom_angle_atom_site_label_1
 _geom_angle_atom_site_label_2
 _geom_angle_atom_site_label_3
 _geom_angle
 _geom_angle_site_symmetry_1
 _geom_angle_site_symmetry_3
 _geom_angle_publ_flag
B1 P B2 111.44(16) . . ?
B1 P C1 112.67(15) . . ?
B1 P C8 109.21(16) . . ?
B2 P C1 115.12(15) . . ?
B2 P C8 104.10(15) . . ?
C1 P C8 103.47(13) . . ?
P B1 H1A 104.7(14) . . ?
P B1 H1B 107.6(15) . . ?
P B1 H1C 112.7(17) . . ?
H1A B1 H1B 112(2) . . ?
H1A B1 H1C 113(2) . . ?
H1B B1 H1C 106(2) . . ?
P B2 H2A 100.2(18) . . ?
P B2 H2B 111.8(13) . . ?
P B2 H2C 108.5(15) . . ?
H2A B2 H2B 112(2) . . ?
H2A B2 H2C 115(2) . . ?
H2B B2 H2C 110(2) . . ?
C1 Si1 C2 109.29(16) . . ?
C1 Si1 C3 112.37(15) . . ?
C1 Si1 C4 111.75(15) . . ?
C2 Si1 C3 104.01(18) . . ?
C2 Si1 C4 111.4(2) . . ?
C3 Si1 C4 107.79(18) . . ?
C1 Si2 C5 114.90(15) . . ?
C1 Si2 C6 107.89(16) . . ?
C1 Si2 C7 111.66(15) . . ?
C5 Si2 C6 103.42(18) . . ?
C5 Si2 C7 108.00(18) . . ?
C6 Si2 C7 110.66(19) . . ?
P C1 Si1 114.06(15) . . ?
P C1 Si2 114.59(16) . . ?
P C1 H1 103.9 . . ?
Si1 C1 Si2 114.61(15) . . ?
Si1 C1 H1 103.9 . . ?
Si2 C1 H1 103.9 . . ?
Si1 C2 H2D 109.5 . . ?
Si1 C2 H2E 109.5 . . ?
Si1 C2 H2F 109.5 . . ?
H2D C2 H2E 109.5 . . ?
H2D C2 H2F 109.5 . . ?
H2E C2 H2F 109.5 . . ?
Si1 C3 H3A 109.5 . . ?
Si1 C3 H3B 109.5 . . ?
Si1 C3 H3C 109.5 . . ?
H3A C3 H3B 109.5 . . ?
H3A C3 H3C 109.5 . . ?
H3B C3 H3C 109.5 . . ?
Si1 C4 H4A 109.5 . . ?
Si1 C4 H4B 109.5 . . ?
Si1 C4 H4C 109.5 . . ?
H4A C4 H4B 109.5 . . ?
H4A C4 H4C 109.5 . . ?
H4B C4 H4C 109.5 . . ?
Si2 C5 H5A 109.5 . . ?
Si2 C5 H5B 109.5 . . ?
Si2 C5 H5C 109.5 . . ?
H5A C5 H5B 109.5 . . ?
H5A C5 H5C 109.5 . . ?
H5B C5 H5C 109.5 . . ?
Si2 C6 H6A 109.5 . . ?
Si2 C6 H6B 109.5 . . ?
Si2 C6 H6C 109.5 . . ?
H6A C6 H6B 109.5 . . ?
H6A C6 H6C 109.5 . . ?
H6B C6 H6C 109.5 . . ?
Si2 C7 H7A 109.5 . . ?
Si2 C7 H7B 109.5 . . ?
Si2 C7 H7C 109.5 . . ?
H7A C7 H7B 109.5 . . ?
H7A C7 H7C 109.5 . . ?
H7B C7 H7C 109.5 . . ?
P C8 C9 120.8(2) . . ?
P C8 C13 121.4(2) . . ?
C9 C8 C13 117.8(3) . . ?
C8 C9 H9 119.7 . . ?
C8 C9 C10 120.5(3) . . ?
H9 C9 C10 119.7 . . ?
C9 C10 H10 119.6 . . ?
C9 C10 C11 120.8(4) . . ?
H10 C10 C11 119.6 . . ?
C10 C11 H11 120.5 . . ?
C10 C11 C12 119.0(3) . . ?
H11 C11 C12 120.5 . . ?
C11 C12 H12 119.8 . . ?
C11 C12 C13 120.5(4) . . ?
H12 C12 C13 119.8 . . ?
C8 C13 C12 121.4(3) . . ?
C8 C13 H13 119.3 . . ?
C12 C13 H13 119.3 . . ?
H1A K H1A 145.1(6) . 4_465 ?
H1A K H1B 36.5(8) . . ?
H1A K H1B 34.4(7) 4_465 4_465 ?
H1A K H1B 127.2(7) . 4_465 ?
H1A K H1B 125.8(8) 4_465 . ?
H1A K H1C 37.4(8) 4_465 4_465 ?
H1A K H1C 153.4(8) . 4_465 ?
H1A K H2A 73.0(9) . . ?
H1A K H2A 143.8(9) 4_465 4_565 ?
H1A K H2A 71.0(9) . 4_565 ?
H1A K H2A 72.2(8) 4_465 . ?
H1A K H2B 61.7(7) . . ?
H1A K H2B 87.5(7) 4_465 . ?
H1A K H2B 125.2(7) 4_465 4_565 ?
H1A K H2B 81.0(7) . 4_565 ?
H1A K H2C 106.5(8) 4_465 4_565 ?
H1A K H2C 107.1(8) . 4_565 ?
H1A K O1 85.7(5) . . ?
H1A K O1 103.1(5) 4_465 . ?
H1A K O2 108.6(5) . . ?
H1A K O2 68.3(5) 4_465 . ?
H1B K H1B 137.0(7) . 4_465 ?
H1B K H1C 32.7(8) 4_465 4_465 ?
H1B K H1C 163.2(9) . 4_465 ?
H1B K H2A 65.2(9) . . ?
H1B K H2A 141.2(8) 4_465 4_565 ?
H1B K H2A 79.5(9) . 4_565 ?
H1B K H2A 71.8(8) 4_465 . ?
H1B K H2B 77.5(8) . . ?
H1B K H2B 66.6(7) 4_465 . ?
H1B K H2B 151.3(7) 4_465 4_565 ?
H1B K H2B 68.0(8) . 4_565 ?
H1B K H2C 119.7(8) 4_465 4_565 ?
H1B K H2C 101.7(9) . 4_565 ?
H1B K O1 122.1(6) . . ?
H1B K O1 71.7(5) 4_465 . ?
H1B K O2 72.1(6) . . ?
H1B K O2 102.0(5) 4_465 . ?
H1C K H2A 115.0(10) 4_465 4_565 ?
H1C K H2A 101.9(10) 4_465 . ?
H1C K H2B 98.5(8) 4_465 . ?
H1C K H2B 119.0(8) 4_465 4_565 ?
H1C K H2C 87.1(9) 4_465 4_565 ?
H1C K O1 71.5(7) 4_465 . ?
H1C K O2 95.6(7) 4_465 . ?
H2A K H2A 142.5(8) . 4_565 ?
H2A K H2B 36.2(8) . . ?
H2A K H2B 126.2(8) 4_565 . ?
H2A K H2B 33.6(8) 4_565 4_565 ?
H2A K H2B 129.4(8) . 4_565 ?
H2A K H2C 37.9(9) 4_565 4_565 ?
H2A K H2C 158.6(9) . 4_565 ?
H2A K O1 110.7(6) . . ?
H2A K O1 76.9(7) 4_565 . ?
H2A K O2 79.2(7) . . ?
H2A K O2 102.4(7) 4_565 . ?
H2B K H2B 142.1(6) . 4_565 ?
H2B K H2C 162.2(8) . 4_565 ?
H2B K H2C 33.7(7) 4_565 4_565 ?
H2B K O1 75.5(5) . . ?
H2B K O1 109.7(5) 4_565 . ?
H2B K O2 115.4(5) . . ?
H2B K O2 68.9(4) 4_565 . ?
H2C K O1 90.5(6) 4_565 . ?
H2C K O2 80.6(6) 4_565 . ?
O1 K O2 164.79(8) . . ?
K O1 C14 118.15(19) . . ?
K O1 C17 124.3(2) . . ?
C14 O1 C17 109.4(3) . . ?
O1 C14 H14A 110.6 . . ?
O1 C14 H14B 110.6 . . ?
O1 C14 C15 105.7(3) . . ?
H14A C14 H14B 108.7 . . ?
H14A C14 C15 110.6 . . ?
H14B C14 C15 110.6 . . ?
C14 C15 H15A 110.3 . . ?
C14 C15 H15B 110.3 . . ?
C14 C15 C16 107.2(4) . . ?
H15A C15 H15B 108.5 . . ?
H15A C15 C16 110.3 . . ?
H15B C15 C16 110.3 . . ?
C15 C16 H16A 110.3 . . ?
C15 C16 H16B 110.3 . . ?
C15 C16 C17 107.3(4) . . ?
H16A C16 H16B 108.5 . . ?
H16A C16 C17 110.3 . . ?
H16B C16 C17 110.3 . . ?
O1 C17 C16 106.1(3) . . ?
O1 C17 H17A 110.5 . . ?
O1 C17 H17B 110.5 . . ?
C16 C17 H17A 110.5 . . ?
C16 C17 H17B 110.5 . . ?
H17A C17 H17B 108.7 . . ?
K O2 C18 111.21(17) . . ?
K O2 C21 138.4(2) . . ?
C18 O2 C21 109.9(2) . . ?
O2 C18 H18A 110.4 . . ?
O2 C18 H18B 110.4 . . ?
O2 C18 C19 106.7(3) . . ?
H18A C18 H18B 108.6 . . ?
H18A C18 C19 110.4 . . ?
H18B C18 C19 110.4 . . ?
C18 C19 H19A 110.5 . . ?
C18 C19 H19B 110.5 . . ?
C18 C19 C20 106.1(3) . . ?
H19A C19 H19B 108.7 . . ?
H19A C19 C20 110.5 . . ?
H19B C19 C20 110.5 . . ?
C19 C20 H20A 110.6 . . ?
C19 C20 H20B 110.6 . . ?
C19 C20 C21 105.9(3) . . ?
H20A C20 H20B 108.7 . . ?
H20A C20 C21 110.6 . . ?
H20B C20 C21 110.6 . . ?
O2 C21 C20 105.2(3) . . ?
O2 C21 H21A 110.7 . . ?
O2 C21 H21B 110.7 . . ?
C20 C21 H21A 110.7 . . ?
C20 C21 H21B 110.7 . . ?
H21A C21 H21B 108.8 . . ?

_diffrn_measured_fraction_theta_max    0.996
_diffrn_reflns_theta_full              25.00
_diffrn_measured_fraction_theta_full   0.996
_refine_diff_density_max    0.543
_refine_diff_density_min   -0.396
_refine_diff_density_rms    0.061

# SQUEEZE RESULTS (APPEND TO CIF)
loop_
  _platon_squeeze_void_nr
  _platon_squeeze_void_average_x
  _platon_squeeze_void_average_y
  _platon_squeeze_void_average_z
  _platon_squeeze_void_volume
  _platon_squeeze_void_count_electrons
         1    -0.248     0.250     0.530     194.3       6.0
         2    -0.248     0.250     0.030     194.2       6.0
         3     0.248     0.750     0.970     194.2       5.9
         4     0.248     0.750     0.470     194.3       6.0
_platon_squeeze_details
; The void volume is appropriate for toluene (one molecule per void), 
but the electron count is too low, indicating facile loss of solvent
from the crystals before data collection.  Because the solvent can
not be identified confidently, it is not included in the chemical
formula or in properties derived from it (density, etc.).
;


#===END
